# Supplementary material for: 3-Acetyl-11-keto-β-boswellic Acid-Based Hybrids Alleviate Acetaminophen-Induced Hepatotoxicity in HepG2 by the Regulation of Inflammatory and Oxidative Stress Pathways: An Integrated Approach
Source: PubMed Central journal article supplement — ACS Omega. 2023 Oct 12;8(42):39490–510. doi: 10.1021/acsomega.3c05247 (PMC10601058; doi:10.1021/acsomega.3c05247), 2023-10-12
Supplement: ao3c05247_si_001.pdf [file ao3c05247_si_001.pdf]

# Supporting information

## **3-Acetyl-11-keto- $\beta$ -boswellic acid-based hybrids alleviate acetaminophen induced hepatotoxicity in HepG2 by regulation of inflammatory and oxidative stress pathways: An integrated approach.**

Abdullah A. Elgazar<sup>a</sup>, Ramadan A. El-Domany<sup>b</sup>, Wagdy M. Eldehna<sup>c</sup>, Farid A. Badria<sup>d\*</sup>

<sup>a</sup>*Department of Pharmacognosy, Faculty of Pharmacy, Kafrelsheikh University, Kafrelsheikh, P.O. Box 33516, Egypt*

<sup>b</sup>*Department of Microbiology and Immunology, Faculty of Pharmacy, Kafrelsheikh University, Kafrelsheikh, P.O. Box 33516, Egypt*

<sup>c</sup>*Department of Pharmaceutical Chemistry, Faculty of Pharmacy, Kafrelsheikh University, Kafrelsheikh, P.O. Box 33516, Egypt*

<sup>d</sup>*Department of Pharmacognosy, Faculty of Pharmacy, Mansoura University, Mansoura, Egypt*

\*Corresponding author:

Farid A. Badria Tel.: (+20)1001762927, E-mail address: faridbadria@gmail.com

Table S1. NMR assignment of Compound 3a

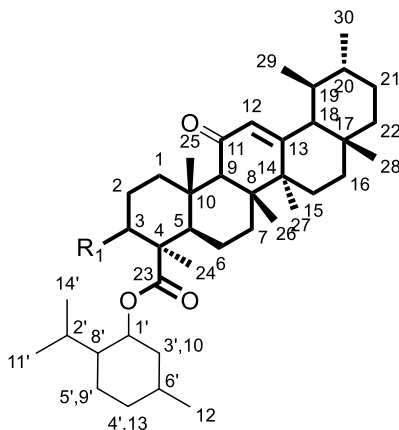

| Parent compound                 |                                |                          | Hybrid compound |                                 |                          |
|---------------------------------|--------------------------------|--------------------------|-----------------|---------------------------------|--------------------------|
| Atom C/H                        | <sup>1</sup> H (δ, ppm) (J,Hz) | <sup>13</sup> C (δ, ppm) | DEPT            | <sup>1</sup> H (δ, ppm) (J,Hz)  | <sup>13</sup> C (δ, ppm) |
| 11                              | -                              | 199.6                    | C               | --                              | 200.2                    |
| 24                              | -                              | 182.2                    | C               | --                              | 175.9                    |
| CH <sub>3</sub> CO              | -                              | 170.5                    | C               | --                              | 171.1                    |
| 13                              | -                              | 165.3                    | C               | --                              | 169.6                    |
| 12                              | 5.54 s                         | 130.8                    | CH              | 5.56 (s, 1H)                    | 128.5                    |
| 3                               | 5.28 t                         | 73.6                     | CH              | 5.23 (s, 1H)                    | 80.6                     |
| Menthol 1 (Kwan and Huang 2008) | 3.4 td, (j=10.4,4.3)           | 71.5                     | CH              | 4.61 (td, J = 11.3, 4.0 Hz, 1H) | 74                       |
| 9                               | 2.39 s                         | 60.7                     | CH              | 2.30 (s, 1H)                    | 61.7                     |
| 18                              | 1.37 d (J=12.3)                | 59.4                     | CH              | 1.27 – 1.16 (m, 1H)             | 55                       |
| 5                               | 1.38 dd, (J=12,2)              | 50.8                     | CH              | 1.85 – 1.47 (m, 1H)             | 48.4                     |
| 8'                              | 1.1                            | 50.12                    | CH              | 0.87 – 0.79 (m, 1H)             | 48.4                     |
| 4                               | -                              | 46.7                     | C               | --                              | 46.9                     |
| 14                              | -                              | 45.3                     | C               | --                              | 45.4                     |
| 10'                             | 0.95                           | 45                       | CH              | 0.87 – 0.79 (m, 1H)s            | 43.97                    |
| 3'                              | 1.9                            | 45                       | CH              | 1.85 – 1.47 (m, 1H)             | 43.97                    |
| 8                               | -                              | 43.9                     | C               | --                              | 43.25                    |

|                    |                                 |       |                 |                                  |       |
|--------------------|---------------------------------|-------|-----------------|----------------------------------|-------|
| 22                 | 1.29 m                          | 41.3  | CH <sub>2</sub> | 1.05 – 0.88 (m, 2H)              | 41.08 |
| 19                 | 1.52 m                          | 39.7  | CH              | 1.46 – 1.28 (m, 1H)              | 40.92 |
| 20                 | 1.39 m                          | 39.6  | CH              | 1.46 – 1.28 (m, 1H)              | 38.8  |
| 10                 | -                               | 37.6  | C               | --                               | 38.05 |
| 1                  | 2.53 dd,<br>(J=13.2,2)          | 35.0  | CH <sub>2</sub> | 2.73 (d, <i>J</i> = 13.5 Hz, 2H) | 37.7  |
| 13'                | 0.84                            | 34.52 | CH              | 0.87 – 0.79 (m, 1H)              | 36.9  |
| 4'                 | 1.66                            | 34.5  | CH              | 1.85 – 1.47 (m, 1H)              | 36.9  |
| 17                 | -                               | 34.2  | C               | --                               | 34.2  |
| 15                 | 1.66 m                          | 33.2  | CH <sub>2</sub> | 1.85 – 1.47 (m, 2H)              | 32.72 |
| 6'                 | 1.43                            | 31.6  | CH              | 1.85 – 1.47 (m, 1H)              | 31.8  |
| 7                  | 1.43 m                          | 31.3  | CH <sub>2</sub> | 1.46 – 1.28 (m, 2H)              | 31.4  |
| 30                 | 0.80 d<br>( <i>J</i> =7.4)      | 29.3  | CH <sub>3</sub> | 0.76 – 0.65(m, 3H)               | 31.2  |
| 21                 | 1.01 dd<br>( <i>J</i> =11.8, 3) | 27.9  | CH <sub>2</sub> | 1.05 – 0.88 (m, 2H)              | 28.6  |
| 16                 | 1.88 m                          | 27.6  | CH <sub>2</sub> | 1.85 – 1.47 (m, 2H)              | 28.3  |
| 2'                 | 2.17                            | 25.8  | CH              | 2.05 (d, <i>J</i> = 13.0 Hz, 1H) | 28.05 |
| 23                 | 1.21 s                          | 24.3  | CH <sub>3</sub> | 1.16 – 1.04 (m, 3H)              | 26.44 |
| 2                  | 1.56 m,<br>2.22 m               | 23.9  | CH <sub>2</sub> | 1.46 – 1.28 (m, 2H)              | 26    |
| 9'                 | 0.97                            | 23.1  | CH              | 0.87 – 0.79 (m, 1H)              | 23.58 |
| 5'                 | 1.61                            | 23.1  | CH              | 1.85 – 1.47 (m, 1H)              | 23.58 |
| 12'                | 0.91                            | 22.2  | CH <sub>3</sub> | 0.87 – 0.79 (m, 3H)              | 23.3  |
| CH <sub>3</sub> CO | 2.07 s                          | 21.7  | CH <sub>3</sub> | 1.91 (t, <i>J</i> = 14.3 Hz, 3H) | 23.12 |
| 28                 | 0.93 s                          | 21.5  | CH <sub>3</sub> | 0.87 – 0.79 (m, 3H)              | 22.03 |
| 11'                | 0.92                            | 21    | CH <sub>3</sub> | 0.87 – 0.79 (m, 3H)              | 21.3  |

|     |                |      |                 |                     |      |
|-----|----------------|------|-----------------|---------------------|------|
| 27  | 1.33 s         | 20.9 | CH3             | 1.46 – 1.28 (m, 3H) | 20.8 |
| 6   | 1.75 m         | 19.2 | CH <sub>2</sub> | 1.85 – 1.47 (m, 2H) | 18.7 |
| 26  | 1.17 s         | 18.8 | CH3             | 1.16 – 1.04 (m, 3H) | 17.4 |
| 29  | 0.78 d (J=6.3) | 17.8 | CH3             | 0.76 – 0.65 (m, 3H) | 16.7 |
| 14' | 0.8            | 16   | CH3             | 0.76 – 0.65(m, 3H)  | 16.4 |
| 25  | 1.12 s         | 13.6 | CH3             | 1.16 – 1.04 (m, 3H) | 15.9 |
| 7'  | 1.35           | --   | --              | --                  | --   |

**Table S2. NMR assignment of Compound 3b**

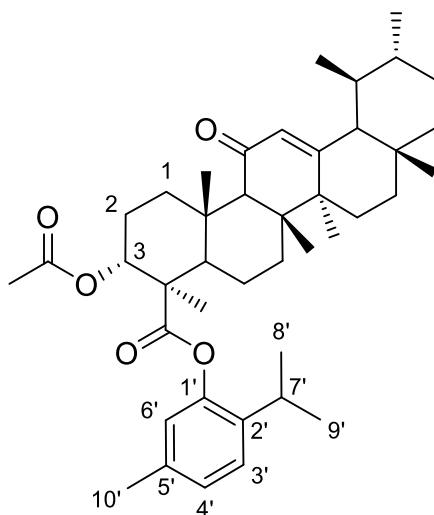

| \Atom<br>C/H | Parent compound                           |      |                                         | Hybrid compound |                                           |      |                                      |
|--------------|-------------------------------------------|------|-----------------------------------------|-----------------|-------------------------------------------|------|--------------------------------------|
|              | <sup>1</sup> H<br>( $\delta$ ,<br>(J,Hz)) | ppm) | <sup>13</sup> C<br>( $\delta$ ,<br>ppm) | DEPT            | <sup>1</sup> H<br>( $\delta$ ,<br>(J,Hz)) | ppm) | <sup>13</sup> C<br>( $\delta$ , ppm) |
| OH-          | 9.99                                      |      | -                                       |                 | --                                        |      | --                                   |
| 25           | 1.12 s                                    |      | 13.6                                    | CH3             | 1.21 – 1.09 (m, 3H)                       |      | 14.2                                 |
| 29           | 0.78 d(J=6.3)                             |      | 17.8                                    | CH3             | 1.02 – 0.69 (m, 3H)                       |      | 17.4                                 |
| 10'          | 2.2                                       |      | 18.7                                    | CH3             | 2.1                                       |      | 18.4                                 |
| 26           | 1.17 s                                    |      | 18.8                                    | CH3             | 1.21 – 1.09 (m, 3H)                       |      | 19                                   |
| 6            | 1.75 m                                    |      | 19.2                                    | CH <sub>2</sub> | 1.63 – 1.47 (m, 2H)                       |      | 20.6                                 |
| 27           | 1.33 s                                    |      | 20.9                                    | CH3             | 1.46 – 1.22 (m, 3H)                       |      | 21.1                                 |
| 28           | 0.93 s                                    |      | 21.5                                    | CH3             | 1.02 – 0.69 (m, 3H)                       |      | 21.6                                 |
| CH3CO        | 2.07 s                                    |      | 21.7                                    | CH3             | 1.86 (s, 3H)                              |      | 22.7                                 |

|                    |                                 |       |                 |                                       |        |
|--------------------|---------------------------------|-------|-----------------|---------------------------------------|--------|
| 2                  | 1.56 m,<br>2.22 m               | 23.9  | CH <sub>2</sub> | 1.63 – 1.47 (m, 2H)                   | 23.59  |
| 23                 | 1.21 s                          | 24.3  | CH <sub>3</sub> | 1.46 – 1.22 (m, 3H)                   | 23.85  |
| 7'                 | 3.3                             | 25.5  | CH              | 2.6 (dt, <i>J</i> = 13.5, 3.6 Hz, 1H) | 23.85  |
| 8',9'              | 1.05                            | 26.1  | CH <sub>3</sub> | 1.02 – 0.69 (m, 6H)                   | 26.6   |
| 16                 | 1.88 m                          | 27.6  | CH <sub>2</sub> | 1.75 – 1.64 (m, 2H),                  | 27.25  |
| 21                 | 1.01 dd( <i>J</i> =11.8, 3)     | 27.9  | CH <sub>2</sub> | 1.21 – 1.09 (m, 2H)                   | 27.46  |
| 30                 | 0.80 d( <i>J</i> =7.4)          | 29.3  | CH <sub>3</sub> | 1.02 – 0.69 (m, 3H)                   | 28.8   |
| 7                  | 1.43 m                          | 31.3  | CH <sub>2</sub> | 1.46 – 1.22 (m, 2H)                   | 32.7   |
| 15                 | 1.66 m                          | 33.2  | CH <sub>2</sub> | 1.63 – 1.47 (m, 2H)                   | 33.9   |
| 17                 | -                               | 34.2  | C               | --                                    | 34.2   |
| 1                  | 2.53 dd,<br>( <i>J</i> =13.2,2) | 35.0  | CH <sub>2</sub> | 2.22 (s, 2H),                         | 34.2   |
| 10                 | -                               | 37.6  | C               | --                                    | 37.4   |
| 20                 | 1.39 m                          | 39.6  | CH              | 1.46 – 1.22 (m, 1H)                   | 39.2   |
| 19                 | 1.52 m                          | 39.7  | CH              | 1.63 – 1.47 (m, 1H)                   | 39.3   |
| 22                 | 1.29 m                          | 41.3  | CH <sub>2</sub> | 1.46 – 1.22 (m, 2H)                   | 40.8   |
| 8                  | -                               | 43.9  | C               | --                                    | 43.8   |
| 14                 | -                               | 45.3  | C               | --                                    | 45.0   |
| 4                  | -                               | 46.7  | C               | --                                    | 47.2   |
| 5                  | 1.38 dd,<br>( <i>J</i> =12,2)   | 50.8  | CH              | 1.46 – 1.22 (m, 1H)                   | 50.57  |
| 18                 | 1.37 d<br>( <i>J</i> =12.3)     | 59.4  | CH              | 1.46 – 1.22 (m, 1H)                   | 59.05  |
| 9                  | 2.39 s                          | 60.7  | CH              | 2.44 (s, 1H)                          | 60.15  |
| 3                  | 5.28 t                          | 73.6  | CH              | 5.4(d, <i>J</i> = 3.0 Hz, 1H)         | 72.2   |
| 2'                 | 5.4                             | 116.9 | CH              | 7.30 (d, <i>J</i> = 2.4 Hz, 1H)       | 121.6  |
| 4'                 | 6.19                            | 123.6 | CH              | 7.36 (t, <i>J</i> = 7.7 Hz, 1H)       | 124.89 |
| 5'                 | 7.08                            | 126.3 | CH              | 7.5 (t, <i>J</i> = 7.7 Hz, 1H)        | 128.7  |
| 12                 | 5.54 s                          | 130.8 | CH              | 5.5 (s, 1H)                           | 128.88 |
| 6'                 | --                              | 131.7 | C               | --                                    | 130.4  |
| 3'                 | -                               | 138.4 | C               | --                                    | 143    |
| 1'                 | -                               | 150.2 | C               | --                                    | 147    |
| 13                 | -                               | 165.3 | C               | --                                    | 165    |
| CH <sub>3</sub> CO | -                               | 170.5 | C               | --                                    | 170    |
| 24                 | -                               | 182.2 | C               | --                                    | 172.3  |
| 11                 | -                               | 199.6 | C               | --                                    | 198.9  |

**Table S3. NMR assignment of Compound 5a**

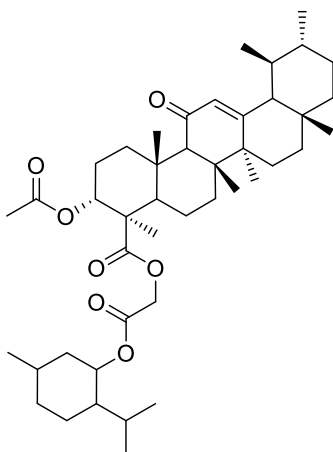

| Parent compound                          |                                |                          | Hybrid compound |                                        |                          |
|------------------------------------------|--------------------------------|--------------------------|-----------------|----------------------------------------|--------------------------|
| Atom C/H                                 | <sup>1</sup> H (δ, (J,Hz) ppm) | <sup>13</sup> C (δ, ppm) | DEPT            | <sup>1</sup> H (δ, (J,Hz) ppm)         | <sup>13</sup> C (δ, ppm) |
| 11                                       | -                              | 199.6                    | C               | --                                     | 199.32                   |
| 24                                       | -                              | 182.2                    | C               | --                                     | 175.06                   |
| CH <sub>3</sub> CO                       | -                              | 170.5                    | C               | --                                     | 170.18                   |
| -CH <sub>2</sub> -CO                     | --                             | 167.2                    | C               | --                                     | 167.19                   |
| 13                                       | -                              | 165.3                    | C               | --                                     | 164.99                   |
| 12                                       | 5.54 s                         | 130.8                    | CH              | 5.48 (s, 1H)                           | 130.51                   |
| 3                                        | 5.28 t                         | 73.6                     | CH              | 5.30 (d, <i>J</i> = 2.9 Hz, 1H)        | 75.63                    |
| Menthol 1 ( <i>Kwan and Huang 2008</i> ) | 3.4 td, ( <i>j</i> =10.4,4.3)  | 71.5                     | CH              | 4.69 (dt, <i>J</i> = 10.9, 5.5 Hz, 1H) | 73.23                    |
| 9                                        | 2.39 s                         | 60.7                     | CH              | 2.35 (s, 1H)                           | 60.76                    |
| 18                                       | 1.37 d ( <i>J</i> =12.3)       | 59.4                     | CH              | 1.51 – 1.31 (m, 1H)                    | 59.03                    |
| 5                                        | 1.38 dd, ( <i>J</i> =12,2)     | 50.8                     | CH              | 1.51 – 1.31 (m, 1H)                    | 50.39                    |
| 8'                                       | 1.1                            | 50.12                    | CH              | 1.51 – 1.31 (m, 1H)                    | 46.91                    |
| 4                                        | -                              | 46.7                     | C               | --                                     | 46.76                    |
| 14                                       | -                              | 45.3                     | C               | --                                     | 45.09                    |
| 3'                                       | 1.9                            | 45                       | CH              | 1.93 (d, <i>J</i> = 12.1 Hz, 1H)       | 43.77                    |
| 10'                                      | 0.95                           | 45                       | CH              | 0.88 (s, 1H)                           | 43.77                    |
| 8                                        | -                              | 43.9                     | C               | --                                     | 40.92                    |
| 22                                       | 1.29 m                         | 41.3                     | CH <sub>2</sub> | 1.31 – 1.11 (m, 2H)                    | 40.74                    |

|                      |                                              |       |                 |                                              |       |
|----------------------|----------------------------------------------|-------|-----------------|----------------------------------------------|-------|
| 19                   | 1.52 m                                       | 39.7  | CH              | 1.51 – 1.31 (m, 1H)                          | 39.33 |
| 20                   | 1.39 m                                       | 39.6  | CH              | 1.51 – 1.31 (m, 1H)                          | 39.29 |
| 10                   | -                                            | 37.6  | C               | --                                           | 37.30 |
| 1                    | 2.53 dd,<br>(J=13.2,2)                       | 35.0  | CH <sub>2</sub> | 2.47 (dt, <i>J</i> = 13.2, 3.6 Hz, 2H)       | 34.56 |
| 13'                  | 0.84                                         | 34.52 | CH              | 0.82 (t, <i>J</i> = 6.2 Hz, 1H)              | 34.12 |
| 4'                   | 1.66                                         | 34.5  | CH              | 1.89 – 1.70 (m, 1H)                          | 34.12 |
| 17                   | -                                            | 34.2  | C               | --                                           | 33.98 |
| 15                   | 1.66 m                                       | 33.2  | CH <sub>2</sub> | 1.64 – 1.52 (m, 2H)                          | 32.87 |
| 6'                   | 1.43                                         | 31.6  | CH              | 1.51 – 1.31 (m, 1H)                          | 31.41 |
| 7                    | 1.43 m                                       | 31.3  | CH <sub>2</sub> | 1.51 – 1.31 (m, 2H)                          | 30.92 |
| 30                   | 0.80 d<br>( <i>J</i> =7.4)                   | 29.3  | CH <sub>3</sub> | 0.78 – 0.71 (m, 3H)                          | 28.88 |
| 21                   | 1.01 dd<br>( <i>J</i> =11.8, 3)              | 27.9  | CH <sub>2</sub> | 1.01 (s, 2H)                                 | 27.53 |
| 16                   | 1.88 m                                       | 27.6  | CH <sub>2</sub> | 1.89 – 1.70 (m, 2H)                          | 27.22 |
| 2'                   | 2.17                                         | 25.8  | CH              | 2.15 (ddd, <i>J</i> = 17.9, 9.5, 3.3 Hz, 1H) | 26.11 |
| 23                   | 1.21 s                                       | 24.3  | CH <sub>3</sub> | 1.31 – 1.11 (m, 3H)                          | 23.85 |
| 2                    | 1.56 m,<br>2.22 m                            | 23.9  | CH <sub>2</sub> | 1.64 – 1.52 (m, 2H)                          | 23.54 |
| 5'                   | 1.61                                         | 23.1  | CH              | 1.51 – 1.31 (m, 1H)                          | 23.30 |
| 9'                   | 0.97                                         | 23.1  | CH              | 1.31 – 1.11 (m, 1H)                          | 23.30 |
| 12'                  | 0.91                                         | 22.2  | CH <sub>3</sub> | 0.82 (t, <i>J</i> = 6.2 Hz, 3H)              | 21.98 |
| CH <sub>3</sub> CO   | 2.07 s                                       | 21.7  | CH <sub>3</sub> | 2.03 (s, 3H)                                 | 21.38 |
| 28                   | 0.93 s                                       | 21.5  | CH <sub>3</sub> | 0.88 (s, 3H)                                 | 21.17 |
| 11'                  | 0.92                                         | 21    | CH <sub>3</sub> | 0.82 (t, <i>J</i> = 6.2 Hz, 3H)              | 20.76 |
| 27                   | 1.33 s                                       | 20.9  | CH <sub>3</sub> | 1.31 – 1.11 (m, 3H)                          | 20.56 |
| 6                    | 1.75 m                                       | 19.2  | CH <sub>2</sub> | 1.89 – 1.70 (m, 2H)                          | 18.78 |
| 26                   | 1.17 s                                       | 18.8  | CH <sub>3</sub> | 1.31 – 1.11 (m, 3H)                          | 18.35 |
| 29                   | 0.78 d<br>( <i>J</i> =6.3)                   | 17.8  | CH <sub>3</sub> | 0.68 (d, <i>J</i> = 6.8 Hz, 3H)              | 17.45 |
| 14'                  | 0.8                                          | 16    | CH <sub>3</sub> | 0.78 – 0.71 (m, 3H)                          | 16.22 |
| 25                   | 1.12 s                                       | 13.6  | CH <sub>3</sub> | 1.01 (s, 3H)                                 | 13.38 |
| 7'                   | 1.35                                         | --    | --              | --                                           | --    |
| -CH <sub>2</sub> -CO | 4.61-4.46 (2H, q,<br><i>J</i> =16.0, 16.2Hz) | 60.9  | CH <sub>2</sub> | 4.52 (q, <i>J</i> = 15.8 , 15.78 Hz, 2H)     | 60.29 |

**Table S4 NMR assignment of compound 5b**

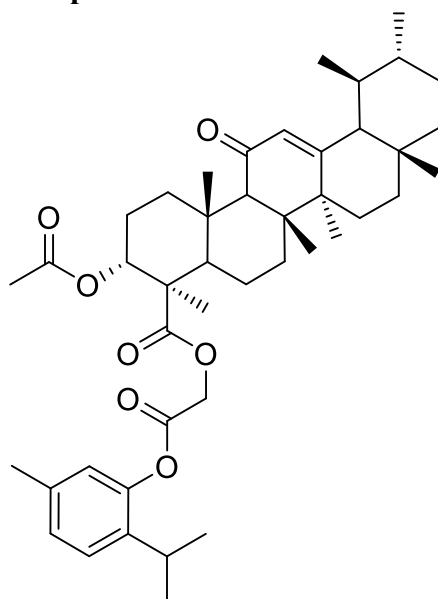

| Parent compound     |                                    |                             | Hybrid compound |                                   |                             |
|---------------------|------------------------------------|-----------------------------|-----------------|-----------------------------------|-----------------------------|
| Atom                | <sup>1</sup> H<br>(δ, ppm) (J,Hz)  | <sup>13</sup> C<br>(δ, ppm) | DEPT            | <sup>1</sup> H<br>(δ, ppm) (J,Hz) | <sup>13</sup> C<br>(δ, ppm) |
| 11                  | -                                  | 199.6                       | C               | --                                | 199.4                       |
| 24                  | -                                  | 182.2                       | C               | --                                | 175.15                      |
| CH <sub>3</sub> CO  | -                                  | 170.5                       | C               | --                                | 170.26                      |
| CH <sub>2</sub> CO  | -                                  | 166.5                       | C               | --                                | 166.56                      |
| LINKER              |                                    |                             |                 |                                   |                             |
| 13                  | -                                  | 165.3                       | C               | --                                | 165.17                      |
| 1'                  | -                                  | 150.2                       | C               | --                                | 147.12                      |
| 3'                  | -                                  | 138.4                       | C               | --                                | 137.03                      |
| 6'                  | --                                 | 131.7                       | C               | --                                | 136.8                       |
| 12                  | 5.54 s                             | 130.8                       | CH              | 5.48 (s, 1H)                      | 130.47                      |
| 5'                  | 7.08                               | 126.3                       | CH              | 7.13 (d, J = 7.9 Hz, 1H)          | 127.62                      |
| 4'                  | 6.19                               | 123.6                       | CH              | 6.96 (dd, J = 8.0, 1.7 Hz, 1H)    | 126.62                      |
| 2'                  | 5.4                                | 116.9                       | CH              | 6.74 (d, J = 1.8 Hz, 1H)          | 122.38                      |
| 3                   | 5.28 t                             | 73.6                        | CH              | 5.32 (d, J = 2.9 Hz, 1H)          | 73.2                        |
| 9                   | 2.39 s                             | 60.7                        | CH              | 2.36 (s, 1H)                      | 60.53                       |
| CH <sub>2</sub> -CO | 4.90-4.73 (2H, q, J=16.0, 16.1 Hz, | 60.7                        | CH <sub>2</sub> | 4.82 (q, J = 17.5 Hz, 2H)         | 60.29                       |
| 18                  | 1.37 d (J=12.3)                    | 59.4                        | CH              | 1.28 (s, 1H)                      | 59.03                       |



|       |                        |               |     |                                                          |             |
|-------|------------------------|---------------|-----|----------------------------------------------------------|-------------|
| 5     | 1.38 dd,<br>(J=12,2)   | 50.8          | CH  | 1.28 (s, 1H)                                             | 50.38       |
| 4     | -                      | 46.7          | C   | --                                                       | 46.85       |
| 14    | -                      | 45.3          | C   | --                                                       | 45.09       |
| 8     | -                      | 43.9          | C   | --                                                       | 43.79       |
| 22    | 1.29 m                 | 41.3          | CH2 | 1.12 – 1.09 (s, 2H)                                      | 40.9        |
| 19    | 1.52 m                 | 39.7          | CH  | 1.49 – 1.35 (m, 1H)                                      | 39.34       |
| 20    | 1.39 m                 | 39.6          | CH  | 1.49 – 1.35 (m, 1H)                                      | 39.28       |
| 10    | -                      | 37.6          | C   | --                                                       | 37.32       |
| 1     | 2.53 dd,<br>(J=13.2,2) | 35.0          | CH2 | 2.48 (dt, J = 13.2, 3.6 Hz,<br>1H)<br>1.49 – 1.35(m, 1H) | 34.51       |
| 17    | -                      | 34.2          | C   | --                                                       | 33.98       |
| 15    | 1.66 m                 | 33.2          | CH2 | 1.49 – 1.35 (m, 2H)                                      | 32.87       |
| 7     | 1.43 m                 | 31.3          | CH2 | 1.49 – 1.35 (m, 2H)                                      | 30.92       |
| 30    | 0.80 d<br>(J=7.4)      | 29.3          | CH3 | 0.77 – 0.70 (m, 3H)                                      | 28.88       |
| 21    | 1.01 dd<br>(J=11.8, 3) | 27.9          | CH2 | 0.97 – 0.85 (m, 2H)                                      | 27.52       |
| 16    | 1.88 m                 | 27.6          | CH2 | 1.94 – 1.76 (m, 2H)                                      | 27.23       |
| 8',9' | 1.05                   | 23.6-<br>26.1 | CH3 | 1.12 – 1.09 (m, 6H)                                      | 23.87-26.97 |
| 7'    | 3.38                   | 25.5          | CH  | 2.88 (dq, J = 16.1, 7.8 Hz,<br>1H)                       | 23.56       |
| 23    | 1.21 s                 | 24.3          | CH3 | 1.21 – 1.15 (m, 3H)                                      | 23.13       |
| 2     | 1.56 m,<br>2.22 m      | 23.9          | CH2 | 1.76 – 1.68 (m, 1H)<br>2.16 (t, J = 12.2 Hz, 1H)         | 23.11       |
| CH3CO | 2.07 s                 | 21.7          | CH3 | 2.02 (s, 3H)                                             | 21.37       |
| 28    | 0.93 s                 | 21.5          | CH3 | 0.97 – 0.85 (m, 3H)                                      | 21.17       |
| 27    | 1.33 s                 | 20.9          | CH3 | 1.28 (s, 3H)                                             | 20.82       |
| 6     | 1.75 m                 | 19.2          | CH2 | 1.60 (ddq, J = 15.5, 10.5,<br>3.8 Hz, 2H)                | 20.55       |
| 26    | 1.17 s                 | 18.8          | CH3 | 1.21 – 1.15 (m, 3H)                                      | 18.8        |
| 10'   | 2.2                    | 18.7          | CH3 | 2.24 (s, 3H)                                             | 18.34       |
| 29    | 0.78 d<br>(J=6.3)      | 17.8          | CH3 | 0.77 – 0.70 (m, 3H)                                      | 17.44       |
| 25    | 1.12 s                 | 13.6          | CH3 | 1.03 (s, 3H)                                             | 13.47       |
| OH-   | 9.99                   | -             |     | --                                                       | --          |

**Table S5 NMR assignment of compound 5c**

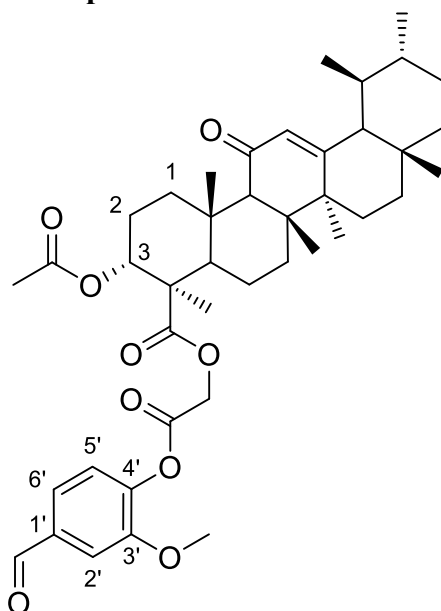

| Parent compound              |                                            |                                      | Hybrid compound |                                                            |                                      |
|------------------------------|--------------------------------------------|--------------------------------------|-----------------|------------------------------------------------------------|--------------------------------------|
| Atom<br>C/H                  | <sup>1</sup> H<br>( $\delta$ , ppm) (J,Hz) | <sup>13</sup> C<br>( $\delta$ , ppm) | DEPT            | <sup>1</sup> H<br>( $\delta$ , ppm) (J,Hz)                 | <sup>13</sup> C<br>( $\delta$ , ppm) |
| 11                           | -                                          | 199.6                                | C               | --                                                         | 199.56                               |
| C=O<br>vanillin              | 10.11                                      | 191.2                                |                 | 9.84 (s, 1H)                                               | 191.1                                |
| 24                           | -                                          | 182.2                                | C               | --                                                         | 175.02.                              |
| CH <sub>3</sub> CO           | -                                          | 170.5                                | C               | --                                                         | 170.38                               |
| CH <sub>2</sub> CO<br>LINKER | -                                          | 166.5                                | C               | --                                                         | 165.44                               |
| 13                           | -                                          | 165.3                                | C               | --                                                         | 165.38                               |
| 4'                           | --                                         | 152.14                               |                 | --                                                         | 151.79                               |
| 3'                           | --                                         | 147.5                                |                 | --                                                         | 147.20                               |
| 12                           | 5.54 s                                     | 130.8                                | CH              | 5.58 (s, 1H)                                               | 130.41                               |
| 1'                           | --                                         | 129.77                               |                 | --                                                         | 129.80                               |
| 6'                           | 6.9 d(J=7.5)                               | 127.49                               | CH              | 7.06 (d, $J = 8.5$ Hz, 1H)                                 | 127.66                               |
| 5'                           | 7.2                                        | 114.75                               | CH              | 7.44 (d, $J = 1.9$ Hz, 1H)                                 | 114.43                               |
| 2'                           | 7.3 d(J=1.50)                              | 109.14                               | CH              | 7.45 (d, $J = 1.8$ Hz, 1H)                                 | 108..81                              |
| 3                            | 5.28 t                                     | 73.6                                 | CH              | 5.40 (dt, $J = 12.3, 2.8$ Hz, 1H)                          | 73.2                                 |
| 9                            | 2.39 s                                     | 60.7                                 | CH              | 2.43 (d, $J = 2.5$ Hz, 1H)                                 | 60.28                                |
| CH <sub>2</sub> -CO          | 4.90-4.73 (2H, q, $J=16.0, 16.1$ Hz,       | 60.7                                 | CH <sub>2</sub> | 4.76 (d, $J = 16.2$ Hz, 1H)<br>4.61 (d, $J = 16.2$ Hz, 1H) | 60.16                                |
| 18                           | 1.37 d<br>( $J=12.3$ )                     | 59.4                                 | CH              | 1.27 (t, $J = 7.0$ Hz, 1H)                                 | 59.02                                |
| -OCH <sub>3</sub>            | 3.84                                       | 56.2                                 |                 | 3.98 (s, 3H)                                               | 56.14                                |

|                    |                            |      |                 |                                                       |       |
|--------------------|----------------------------|------|-----------------|-------------------------------------------------------|-------|
| vanillin           |                            |      |                 |                                                       |       |
| 5                  | 1.38 dd,<br>( $J=12,2$ )   | 50.8 | CH              | 1.27 (t, $J = 7.0$ Hz, 1H)                            | 50.39 |
| 4                  | -                          | 46.7 | C               | --                                                    | 46.79 |
| 14                 | -                          | 45.3 | C               | --                                                    | 45.09 |
| 8                  | -                          | 43.9 | C               | --                                                    | 43.80 |
| 22                 | 1.29 m                     | 41.3 | CH <sub>2</sub> | 1.27 (t, $J = 7.0$ Hz, 2H)                            | 40.9  |
| 19                 | 1.52 m                     | 39.7 | CH              | 1.56 (d, $J = 11.0$ Hz, 1H)                           | 39.33 |
| 20                 | 1.39 m                     | 39.6 | CH              | 1.36 (s, 1H)                                          | 39.27 |
| 10                 | -                          | 37.6 | C               | --                                                    | 37.31 |
| 1                  | 2.53 dd,<br>( $J=13.2,2$ ) | 35.0 | CH <sub>2</sub> | 2.56 (dd, $J = 13.2, 3.7$ Hz, 1H) 1.53 – 1.38 (m, 1H) | 34.50 |
| 17                 | -                          | 34.2 | C               | --                                                    | 33.98 |
| 15                 | 1.66 m                     | 33.2 | CH <sub>2</sub> | 1.92 (dd, $J = 9.3, 4.1$ Hz, 2H)                      | 32.86 |
| 7                  | 1.43 m                     | 31.3 | CH <sub>2</sub> | 1.53 – 1.38 (m, 2H)                                   | 30.91 |
| 30                 | 0.80 d<br>( $J=7.4$ )      | 29.3 | CH <sub>3</sub> | 0.86 – 0.79 (m, 3H)                                   | 28.89 |
| 21                 | 1.01 dd<br>( $J=11.8, 3$ ) | 27.9 | CH <sub>2</sub> | 0.96 (s, 2H)                                          | 27.52 |
| 16                 | 1.88 m                     | 27.6 | CH <sub>2</sub> | 2.23 (t, $J = 15.7$ Hz, 2H)                           | 27.23 |
| 23                 | 1.21 s                     | 24.3 | CH <sub>3</sub> | 1.24 – 1.14 (m, 3H)                                   | 23.88 |
| 2                  | 1.56 m,<br>2.22 m          | 23.9 | CH <sub>2</sub> | 1.83 – 1.59 (m, 2H)                                   | 23.55 |
| CH <sub>3</sub> CO | 2.07 s                     | 21.7 | CH <sub>3</sub> | 2.11 (d, $J = 2.0$ Hz, 3H)                            | 21.38 |
| 28                 | 0.93 s                     | 21.5 | CH <sub>3</sub> | 0.96 (s, 3H)                                          | 21.16 |
| 27                 | 1.33 s                     | 20.9 | CH <sub>3</sub> | 1.36 (s, 3H)                                          | 20.5  |
| 6                  | 1.75 m                     | 19.2 | CH <sub>2</sub> | 2.11 (d, $J = 2.0$ Hz, 2H)                            | 18.7  |
| 26                 | 1.17 s                     | 18.8 | CH <sub>3</sub> | 1.24 – 1.14 (m, 3H)                                   | 18.3  |
| 29                 | 0.78 d<br>( $J=6.3$ )      | 17.8 | CH <sub>3</sub> | 0.86 – 0.79 (m, 3H)                                   | 17.43 |
| 25                 | 1.12 s                     | 13.6 | CH <sub>3</sub> | 1.11 (d, $J = 10.0$ Hz, 3H)                           | 13.44 |
| OH-                | 8.71                       | -    |                 | --                                                    | --    |

**Table S6 NMR assignment of compound 5d**

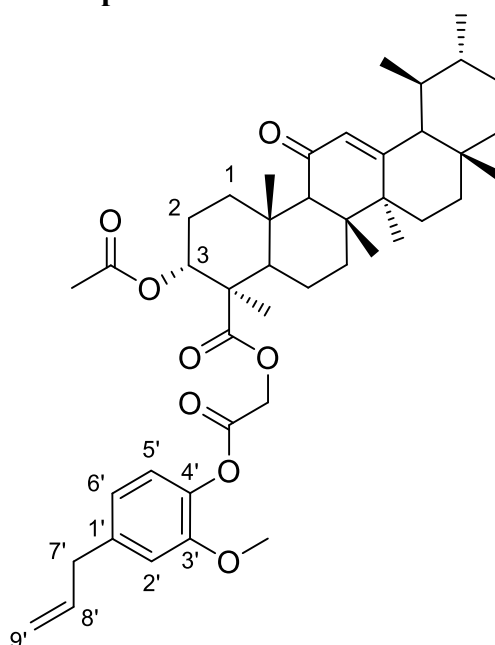

| Parent compound                |                                          |                                     | Hybrid compound |                                          |                                      |
|--------------------------------|------------------------------------------|-------------------------------------|-----------------|------------------------------------------|--------------------------------------|
| Atom<br>C/H                    | <sup>1</sup> H<br>( $\delta$ ,ppm)(J,Hz) | <sup>13</sup> C<br>( $\delta$ ,ppm) | DEPT            | <sup>1</sup> H( $\delta$ ,ppm)(J,Hz)     | <sup>13</sup> C<br>( $\delta$ , ppm) |
| 11                             | -                                        | 199.6                               | C               | --                                       | 199.35                               |
| 24                             | -                                        | 182.2                               | C               | --                                       | 175.02                               |
| CH <sub>3</sub> CO             | -                                        | 170.5                               | C               | --                                       | 170.24                               |
| CH <sub>2</sub> CO<br>LINKER   | -                                        | 166.5                               | C               | --                                       | 165.94                               |
| 13                             | -                                        | 165.3                               | C               | --                                       | 165.02                               |
| 3'                             | --                                       | 146.6                               | C               | --                                       | 150.64                               |
| 4'                             | --                                       | 144.03                              | C               | --                                       | 139.47                               |
| -CH=<br>eugenol                | 5.9                                      | 137.9                               | CH              | 5.87 (ddt, $J = 16.9, 10.2, 6.7$ Hz, 1H) | 137.19                               |
| 1'                             | --                                       | 131.94                              | C               | --                                       | 136.97                               |
| 12                             | 5.54 s                                   | 130.8                               | CH              | 5.47 (s, 1H)                             | 130.51                               |
| 5'                             | 6.67                                     | 121.2                               | CH              | 6.73 – 6.65 (m, 1H)                      | 122.33                               |
| 6'                             | 6.82                                     | 115.49                              | CH              | 6.89 (d, $J = 7.9$ Hz, 1H)               | 120.70                               |
| 2'                             | 6.66                                     | 114.46                              | CH              | 6.73 – 6.65 (m, 1H)                      | 116.26                               |
| Eugenol-<br>CH=CH <sub>2</sub> | 5.06,<br>5.04                            | 111.8                               | CH              | 5.06 – 4.99 (m, 2H)                      | 112.79                               |
| 3                              | 5.28 t                                   | 73.6                                | CH              | 5.33 (d, $J = 2.9$ Hz, 1H)               | 73.24                                |
| 9                              | 2.39 s                                   | 60.7                                | CH              | 2.35 (s, 1H)                             | 60.35                                |

|                        |                                    |      |                 |                                                                               |       |
|------------------------|------------------------------------|------|-----------------|-------------------------------------------------------------------------------|-------|
| CH2-CO                 | 4.90-4.73 (2H, q, J=16.0, 16.1 Hz, | 60.7 | CH2             | 4.90 (d, $J = 16.0$ Hz, 1H) 4.77 (d, $J = 16.0$ Hz, 1H)                       | 60.30 |
| 18                     | 1.37 d (J=12.3)                    | 59.4 | CH              | 1.37 – 1.18 (m, 1H)                                                           | 59.03 |
| -OCH3<br>Eugenol       | 3.8                                | 55.8 | CH3             | 3.73 (s, 3H)                                                                  | 55.86 |
| 5                      | 1.38 dd, (J=12,2)                  | 50.8 | CH              | 1.37 – 1.18 (m, 1H)                                                           | 50.39 |
| 4                      | -                                  | 46.7 | C               | --                                                                            | 46.84 |
| 14                     | -                                  | 45.3 | C               | --                                                                            | 45.09 |
| 8                      | -                                  | 43.9 | C               | --                                                                            | 43.78 |
| 22                     | 1.29 m                             | 41.3 | CH2             | 1.16 (s, 2H)                                                                  | 40.92 |
| CH2-<br>CH=<br>eugenol | 3.29                               | 39.9 | CH2             | 3.29 (d, $J = 6.8$ Hz, 2H)                                                    | 40.10 |
| 19                     | 1.52 m                             | 39.7 | CH              | 1.39 (ddd, $J = 12.1, 10.0, 7.2$ Hz, 1H)                                      | 39.34 |
| 20                     | 1.39 m                             | 39.6 | CH              | 1.37 – 1.18 (m, 1H)                                                           | 39.29 |
| 10                     | -                                  | 37.6 | C               | --                                                                            | 37.33 |
| 1                      | 2.53 dd, (J=13.2,2)                | 35.0 | CH <sub>2</sub> | 2.47 (dt, $J = 13.0, 3.5$ Hz, 1H)<br>1.39 (ddd, $J = 12.1, 10.0, 7.2$ Hz, 1H) | 34.54 |
| 17                     | -                                  | 34.2 | C               | --                                                                            | 33.99 |
| 15                     | 1.66 m                             | 33.2 | CH <sub>2</sub> | 1.66 – 1.53 (m, 2H)                                                           | 32.88 |
| 7                      | 1.43 m                             | 31.3 | CH <sub>2</sub> | 1.39 (ddd, $J = 12.1, 10.0, 7.2$ Hz, 2H)                                      | 30.92 |
| 30                     | 0.80 d (J=7.4)                     | 29.3 | CH3             | 0.81 – 0.70 (m, 3H)                                                           | 28.87 |
| 21                     | 1.01 dd (J=11.8, 3)                | 27.9 | CH2             | 0.87 (s, 2H)                                                                  | 27.53 |
| 16                     | 1.88 m                             | 27.6 | CH <sub>2</sub> | 1.93 – 1.68 (m, 2H)                                                           | 27.23 |
| 23                     | 1.21 s                             | 24.3 | CH3             | 1.37 – 1.18 (m, 3H)                                                           | 23.87 |
| 2                      | 1.56 m,<br>2.22 m                  | 23.9 | CH <sub>2</sub> | 2.18 (td, $J = 14.2, 3.5$ Hz, 1H)<br>1.51 – 1.44 (m, 1H)                      | 23.56 |
| CH3CO                  | 2.07 s                             | 21.7 | CH3             | 2.02 (s, 3H)                                                                  | 21.39 |
| 28                     | 0.93 s                             | 21.5 | CH3             | 0.87 (s, 3H)                                                                  | 21.17 |
| 27                     | 1.33 s                             | 20.9 | CH3             | 1.37 – 1.18 (m, 3H)                                                           | 20.56 |
| 6                      | 1.75 m                             | 19.2 | CH <sub>2</sub> | 1.93 – 1.68 (m, 2H)                                                           | 18.76 |
| 26                     | 1.17 s                             | 18.8 | CH3             | 1.11 (s, 3H)                                                                  | 18.32 |
| 29                     | 0.78 d (J=6.3)                     | 17.8 | CH3             | 0.81 – 0.70 (m, 3H)                                                           | 17.45 |
| 25                     | 1.12 s                             | 13.6 | CH3             | 1.03 (s, 3H)                                                                  | 13.45 |
| OH-                    | 5.6                                | -    |                 | --                                                                            | --    |

**Table S7 NMR assignment of compound 8a**

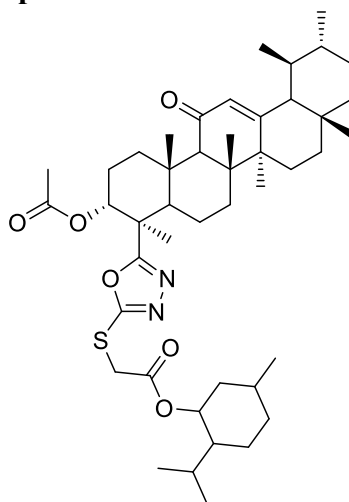

| Parent compound                                     |                                          |                                     | Hybrid compound |                                      |                                      |
|-----------------------------------------------------|------------------------------------------|-------------------------------------|-----------------|--------------------------------------|--------------------------------------|
| Atom<br>C/H                                         | <sup>1</sup> H<br>( $\delta$ ,ppm)(J,Hz) | <sup>13</sup> C<br>( $\delta$ ,ppm) | DEPT            | <sup>1</sup> H( $\delta$ ,ppm)(J,Hz) | <sup>13</sup> C<br>( $\delta$ , ppm) |
| 11                                                  | -                                        | 199.6                               | C               | --                                   | 199.32                               |
| 24                                                  | -                                        | 182.2                               | C               | --                                   | --                                   |
| CH <sub>3</sub> CO                                  | -                                        | 170.5                               | C               | --                                   | 172.16                               |
| -CH <sub>2</sub> -CO<br>MENTHOL                     |                                          | 167.2                               | C               | --                                   | 167.19                               |
| 13                                                  | -                                        | 165.3                               | C               | --                                   | 165                                  |
| 12                                                  | 5.54 s                                   | 130.8                               | CH              | 5.46 (s, 1H)                         | 130.41                               |
| 3                                                   | 5.28 t                                   | 73.6                                | CH              | 4.34 (d, $J = 2.9$<br>Hz, 1H)        | 76.70                                |
| Menthol<br>1 ( <i>Kwan and<br/>Huang<br/>2008</i> ) | 3.4 td,<br>( $j=10.4,4.3$ )              | 71.5                                | CH              | 4.68 (td, $J = 10.9,$<br>4.4 Hz, 1H) | 70.62                                |
| -CH <sub>2</sub> -CO                                | 4.61-4.46 (2H, q,<br>$J=16.0, 16.2$ Hz)  | 60.9                                | CH <sub>2</sub> | 3.98 (s, 2H)                         | 60.34                                |
| 9                                                   | 2.39 s                                   | 60.7                                | CH              | 2.09 – 1.88 (m,<br>1H)               | 59.01                                |
| 18                                                  | 1.37 d<br>( $J=12.3$ )                   | 59.4                                | CH              | 1.69 – 1.55 (m,<br>1H)               | 53.47                                |
| 5                                                   | 1.38 dd,<br>( $J=12,2$ )                 | 50.8                                | CH              | 1.50 – 1.34 (m,<br>1H)               | 49.16                                |
| 8'                                                  | 1.1                                      | 50.12                               | CH              | 1.50 – 1.34 (m,<br>1H)               | 46.92                                |
| 4                                                   | -                                        | 46.7                                | C               | --                                   | 43.81                                |
| 14                                                  | -                                        | 45.3                                | C               | --                                   | 45.09                                |

|     |                        |       |                 |                        |       |
|-----|------------------------|-------|-----------------|------------------------|-------|
| 3'  | 1.9                    | 45    | CH              | 1.87 – 1.73 (m,<br>1H) | 41.91 |
| 10' | 0.95                   | 45    | CH              | 0.90 – 0.76 (m,<br>1H) | 41.91 |
| 8   | -                      | 43.9  | C               | --                     | 40.91 |
| 22  | 1.29 m                 | 41.3  | CH <sub>2</sub> | 1.20 – 1.11 (m,<br>2H) | 40.61 |
| 19  | 1.52 m                 | 39.7  | CH              | 1.50 – 1.34 (m,<br>1H) | 39.28 |
| 20  | 1.39 m                 | 39.6  | CH              | 1.50 – 1.34 (m,<br>1H) | 39.28 |
| 10  | -                      | 37.6  | C               | --                     | 37.11 |
| 1   | 2.53 dd,<br>(J=13.2,2) | 35.0  | CH <sub>2</sub> | 2.52 – 2.36 (m,<br>2H) | 34.71 |
| 13' | 0.84                   | 34.52 | CH              | 0.76 – 0.62 (m,<br>1H) | 34.09 |
| 4'  | 1.66                   | 34.5  | CH              | 1.69 – 1.55 (m,<br>1H) | 33.96 |
| 17  | -                      | 34.2  | C               | --                     | 33.96 |
| 15  | 1.66 m                 | 33.2  | CH <sub>2</sub> | 1.69 – 1.55 (m,<br>2H) | 33.70 |
| 6'  | 1.43                   | 31.6  | CH              | 1.50 – 1.34 (m,<br>1H) | 32.71 |
| 7   | 1.43 m                 | 31.3  | CH <sub>2</sub> | 1.69 – 1.55 (m,<br>2H) | 31.41 |
| 30  | 0.80 d<br>(J=7.4)      | 29.3  | CH <sub>3</sub> | 0.76 – 0.62 (m,<br>3H) | 30.91 |
| 21  | 1.01 dd<br>(J=11.8, 3) | 27.9  | CH <sub>2</sub> | 1.03 – 0.91 (m,<br>1H) | 28.88 |
| 16  | 1.88 m                 | 27.6  | CH <sub>2</sub> | 1.87 – 1.73 (m,<br>2H) | 27.49 |
| 2'  | 2.17                   | 25.8  | CH              | 2.09 – 1.88 (m,<br>1H) | 27.17 |
| 23  | 1.21 s                 | 24.3  | CH <sub>3</sub> | 1.34 – 1.21 (m,<br>3H) | 26.17 |
| 2   | 1.56 m,<br>2.22 m      | 23.9  | CH <sub>2</sub> | 1.69 – 1.55 (m,<br>2H) | 26.03 |
| 5'  | 1.61                   | 23.1  | CH              | 1.50 – 1.34 (m,<br>1H) | 25.39 |
| 9'  | 0.97                   | 23.1  | CH              | 1.03 – 0.91 (m,<br>1H) | 23.29 |
| 12' | 0.91                   | 22.2  | CH <sub>3</sub> | 0.90 – 0.76 (m,<br>3H) | 23.29 |

|                     |                |      |                 |                     |       |
|---------------------|----------------|------|-----------------|---------------------|-------|
| CH <sub>3</sub> CO  | 2.07 s         | 21.7 | CH <sub>3</sub> | 2.09 – 1.88 (m, 3H) | 21.99 |
| 28                  | 0.93 s         | 21.5 | CH <sub>3</sub> | 0.90 – 0.76 (m, 3H) | 21.16 |
| 11'                 | 0.92           | 21   | CH <sub>3</sub> | 0.90 – 0.76 (m, 3H) | 20.79 |
| 27                  | 1.33 s         | 20.9 | CH <sub>3</sub> | 1.34 – 1.21 (m, 3H) | 20.58 |
| 6                   | 1.75 m         | 19.2 | CH <sub>2</sub> | 1.69 – 1.55 (m, 2H) | 18.64 |
| 26                  | 1.17 s         | 18.8 | CH <sub>3</sub> | 1.34 – 1.21 (m, 3H) | 18.36 |
| 29                  | 0.78 d (J=6.3) | 17.8 | CH <sub>3</sub> | 0.76 – 0.62 (m, 3H) | 17.46 |
| 14'                 | 0.8            | 16   | CH <sub>3</sub> | 0.76 – 0.62 (m, 3H) | 16.24 |
| 25                  | 1.12 s         | 13.6 | CH <sub>3</sub> | 1.07 (s, 3H)        | 13.11 |
| O-C=N<br>oxadiazole | --             | --   | C               | --                  | 167   |
| S-C=N<br>oxadiazole | --             | --   | C               | --                  | 162.2 |
| 7'                  | 1.35           | --   | --              | --                  | --    |



**Table S8 NMR assignment of compound 8b**

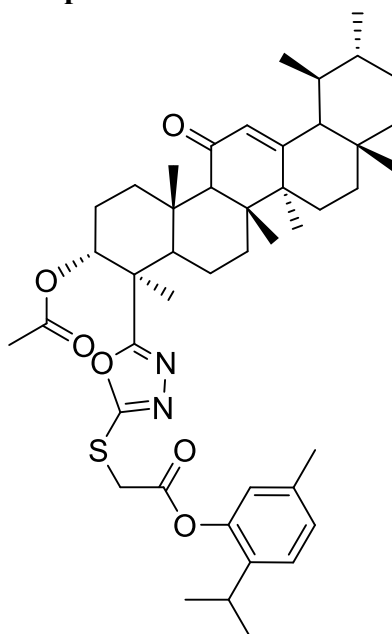

| Atom<br>C/H     | Parent compound                                  |                                         |      | Hybrid compound                                  |                                      |  |
|-----------------|--------------------------------------------------|-----------------------------------------|------|--------------------------------------------------|--------------------------------------|--|
|                 | <sup>1</sup> H<br>( $\delta$ ,<br>(J,Hz)<br>ppm) | <sup>13</sup> C<br>( $\delta$ ,<br>ppm) | DEPT | <sup>1</sup> H<br>( $\delta$ ,<br>(J,Hz)<br>ppm) | <sup>13</sup> C<br>( $\delta$ , ppm) |  |
| 11              | -                                                | 199.6                                   | C    | --                                               | 199.23                               |  |
| 24              | -                                                | 182.2                                   | C    | --                                               |                                      |  |
| CH3CO           | -                                                | 170.5                                   | C    | --                                               | 172.43                               |  |
| O-C=N           |                                                  | 167                                     |      |                                                  | 166.47                               |  |
| CH2CO<br>LINKER | -                                                | 166.5                                   | C    | --                                               | 166.47                               |  |
| 13              | -                                                | 165.3                                   | C    | --                                               | 165.06                               |  |
| S-C=N           |                                                  | 163                                     |      |                                                  | 161.94                               |  |
| 1'              | -                                                | 150.2                                   | C    | --                                               | 147.64                               |  |
| 3'              | -                                                | 138.4                                   | C    | --                                               | 136.88                               |  |
| 6'              | --                                               | 131.7                                   | C    | --                                               | 136.77                               |  |
| 12              | 5.54 s                                           | 130.8                                   | CH   | 5.55 (s, 1H)                                     | 130.42                               |  |
| 5'              | 7.08                                             | 126.3                                   | CH   | 7.21 (d, $J$ = 7.9 Hz, 1H)                       | 127.65                               |  |
| 4'              | 6.19                                             | 123.6                                   | CH   | 7.05 (dd, $J$ = 7.9, 1.7 Hz, 1H)                 | 126.56                               |  |
| 2'              | 5.4                                              | 116.9                                   | CH   | 6.86 (d, $J$ = 1.8 Hz, 1H)                       | 122.29                               |  |
| 3               | 5.28 t                                           | 73.6                                    | CH   | 5.32 (s, 1H)                                     | 70.65                                |  |
| 9               | 2.39 s                                           | 60.7                                    | CH   | 2.46 (s, 1H)                                     | 60.33                                |  |
| CH2-CO          | 4.90-4.73 (2H, q, $J$ = 16.0, 16.1 Hz,           | 60.7                                    | CH2  | 4.33 (d, $J$ = 4.1 Hz, 2H)                       | 59                                   |  |

|                    |                        |      |                 |                             |       |
|--------------------|------------------------|------|-----------------|-----------------------------|-------|
| 18                 | 1.37 d<br>(J=12.3)     | 59.4 | CH              | 1.41 – 1.27 (m, 3H)         | 49.19 |
| 5                  | 1.38 dd,<br>(J=12,2)   | 50.8 | CH              | 1.60 – 1.45 (m, 1H)         | 45.01 |
| 4                  | -                      | 46.7 | C               | --                          | 43.8  |
| 14                 | -                      | 45.3 | C               | --                          | 41.97 |
| 8                  | -                      | 43.9 | C               | --                          | 40.91 |
| 22                 | 1.29 m                 | 41.3 | CH <sub>2</sub> | 1.44 – 1.27 (m, 2H)         | 39.28 |
| 19                 | 1.52 m                 | 39.7 | CH              | 1.60 – 1.45 (m, 1H)         | 39.28 |
| 20                 | 1.39 m                 | 39.6 | CH              | 1.60 – 1.45 (m, 1H)         | 37.1  |
| 10                 | -                      | 37.6 | C               | --                          | 34.42 |
| 1                  | 2.53 dd,<br>(J=13.2,2) | 35.0 | CH <sub>2</sub> | 2.63 – 2.50 (m, 2H)         | 33.96 |
| 17                 | -                      | 34.2 | C               | --                          | 33.67 |
| 15                 | 1.66 m                 | 33.2 | CH <sub>2</sub> | 1.93 – 1.65 (m, 2H)         | 32.68 |
| 7                  | 1.43 m                 | 31.3 | CH <sub>2</sub> | 1.60 – 1.45 (m, 2H)         | 30.91 |
| 30                 | 0.80 d<br>(J=7.4)      | 29.3 | CH <sub>3</sub> | 0.84 – 0.80 (m, 3H)         | 28.86 |
| 21                 | 1.01 dd<br>(J=11.8, 3) | 27.9 | CH <sub>2</sub> | 0.96 (s, 2H)                | 27.49 |
| 16                 | 1.88 m                 | 27.6 | CH <sub>2</sub> | 1.93 – 1.65 (m, 2H)         | 27.17 |
| 8',9'              | 1.05                   | 26   | CH <sub>3</sub> | 1.19 (d, J = 6.9 Hz, 6H)    | 27    |
| 7'                 | 3.38                   | 25.5 | CH              | 3.00 (hept, J = 6.9 Hz, 1H) | 26.06 |
| 23                 | 1.21 s                 | 24.3 | CH <sub>3</sub> | 1.44 – 1.27 (m, 3H)         | 25.41 |
| 2                  | 1.56 m,<br>2.22 m      | 23.9 | CH <sub>2</sub> | 1.93 – 1.65 (m, 2H)         | 23.11 |
| CH <sub>3</sub> CO | 2.07 s                 | 21.7 | CH <sub>3</sub> | 1.93 – 1.65 (m, 3H)         | 23.08 |
| 28                 | 0.93 s                 | 21.5 | CH <sub>3</sub> | 0.96 (s, 3H)                | 21.16 |
| 27                 | 1.33 s                 | 20.9 | CH <sub>3</sub> | 1.44 – 1.27 (m, 3H)         | 20.83 |
| 6                  | 1.75 m                 | 19.2 | CH <sub>2</sub> | 1.93 – 1.65 (m, 2H)         | 20.58 |
| 26                 | 1.17 s                 | 18.8 | CH <sub>3</sub> | 1.44 – 1.27 (m, 3H)         | 18.64 |
| 10'                | 2.2                    | 18.7 | CH <sub>3</sub> | 2.32 (s, 3H)                | 18.32 |
| 29                 | 0.78 d<br>(J=6.3)      | 17.8 | CH <sub>3</sub> | 0.84 – 0.80 (m, 3H)         | 17.45 |
| 25                 | 1.12 s                 | 13.6 | CH <sub>3</sub> | 1.13 (s, 3H)                | 13.1  |
| OH-                | 9.99                   | -    |                 | --                          |       |

**Table S9 NMR assignment of compound 8b**

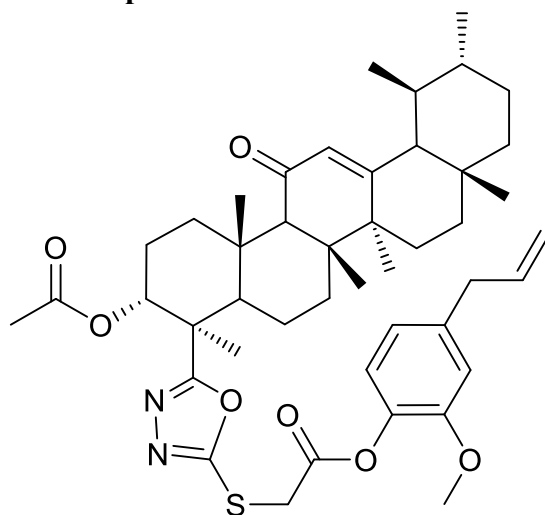

| Parent compound    |                                          | Hybrid compound                     |                 |                                                             |                                      |
|--------------------|------------------------------------------|-------------------------------------|-----------------|-------------------------------------------------------------|--------------------------------------|
| Atom<br>C/H        | <sup>1</sup> H<br>( $\delta$ ,ppm)(J,Hz) | <sup>13</sup> C<br>( $\delta$ ,ppm) | DEPT            | <sup>1</sup> H( $\delta$ ,ppm)(J,Hz)                        | <sup>13</sup> C<br>( $\delta$ , ppm) |
| 3'                 | 6.82                                     | 115.49                              | CH              | 6.99 (d, $J = 7.9$ Hz, 1H)                                  | 120.69                               |
| 4'                 | 6.67                                     | 121.2                               | CH              | 6.82 – 6.74 (m, 1H)                                         | 122.21                               |
| 6'                 | 6.66                                     | 114.46                              | CH              | 6.82 – 6.74 (m, 1H)                                         | 116.31                               |
| -CH=<br>eugenol    | 5.9                                      | 137.9                               | CH              | 5.96 (ddt, $J = 15.6$ ,<br>10.4, 6.7 Hz, 1H)                | 137.66                               |
| 12                 | 5.54 s                                   | 130.8                               | CH              | 5.54 (s, 1H)                                                | 130.42                               |
| 3                  | 5.28 t                                   | 73.6                                | CH              | 5.32 (s, 1H)                                                | 70.66                                |
| Eugenol-<br>CH=CH2 | 5.06,<br>5.04                            | 111.8                               | CH2             | 5.18 – 5.07 (m, 2H)                                         | 112.73                               |
| CH2-CO             | 4.90-4.73 (2H, q,<br>$J=16.0$ , 16.1 Hz, | 60.7                                | CH2             | 4.32 (d, $J = 1.5$ Hz,<br>2H)                               | 59                                   |
| -OCH3<br>Eugenol   | 3.8                                      | 55.8                                | CH3             | 3.81 (s, 3H)                                                | 53.47                                |
| CH2-CH=<br>eugenol | 3.29                                     | 39.9                                | CH2             | 3.38 (d, $J = 6.7$ Hz,<br>2H)                               | 40.08                                |
| 1                  | 2.53 dd,<br>( $J=13.2,2$ )               | 35.0                                | CH <sub>2</sub> | 2.63 – 2.49 (m, 2H)                                         | 34.26                                |
| 9                  | 2.39 s                                   | 60.7                                | CH              | 2.46 (s, 1H)                                                | 60.34                                |
| 2                  | 1.56 m,<br>2.22 m                        | 23.9                                | CH <sub>2</sub> | 2.11 (td, $J = 13.7$ ,<br>4.91H) 1.58 – 1.40<br>(m, 1H) Hz, | 26.05                                |
| 16                 | 1.88 m                                   | 27.6                                | CH <sub>2</sub> | 1.86 (qd, $J = 14.4$ ,<br>8.2 Hz, 2H)                       | 27.49                                |
| CH3CO              | 2.07 s                                   | 21.7                                | CH3             | 1.75 – 1.69 (m, 3H)                                         | 25.37                                |

|                              |                        |        |                 |                     |        |
|------------------------------|------------------------|--------|-----------------|---------------------|--------|
| 15                           | 1.66 m                 | 33.2   | CH <sub>2</sub> | 1.75 – 1.69 (m, 2H) | 33.68  |
| 6                            | 1.75 m                 | 19.2   | CH <sub>2</sub> | 1.75 – 1.69 (m, 2H) | 18.62  |
| 7                            | 1.43 m                 | 31.3   | CH <sub>2</sub> | 1.58 – 1.40 (m, 2H) | 32.68  |
| 19                           | 1.52 m                 | 39.7   | CH              | 1.58 – 1.40 (m, 1H) | 39.28  |
| 18                           | 1.37 d<br>(J=12.3)     | 59.4   | CH              | 1.49 – 1.44 (m, 1H) | 55.84  |
| 5                            | 1.38 dd,<br>(J=12,2)   | 50.8   | CH              | 1.49 – 1.44 (m, 1H) | 49.2   |
| 20                           | 1.39 m                 | 39.6   | CH              | 1.49 – 1.44 (m, 1H) | 39.28  |
| 23                           | 1.21 s                 | 24.3   | CH <sub>3</sub> | 1.40 – 1.15 (m, 3H) | 27.16  |
| 27                           | 1.33 s                 | 20.9   | CH <sub>3</sub> | 1.40 – 1.15 (m, 3H) | 20.58  |
| 22                           | 1.29 m                 | 41.3   | CH <sub>2</sub> | 1.40 – 1.15 (m, 2H) | 40.91  |
| 26                           | 1.17 s                 | 18.8   | CH <sub>3</sub> | 1.11 (s, 3H)        | 18.3   |
| 25                           | 1.12 s                 | 13.6   | CH <sub>3</sub> | 1.04 – 0.95 (m, 3H) | 13.08  |
| 21                           | 1.01 dd<br>(J=11.8, 3) | 27.9   | CH <sub>2</sub> | 1.04 – 0.95 (m, 2H) | 28.87  |
| 30                           | 0.80 d<br>(J=7.4)      | 29.3   | CH <sub>3</sub> | 0.84 – 0.78 (m, 3H) | 30.91  |
| 28                           | 0.93 s                 | 21.5   | CH <sub>3</sub> | 0.84 – 0.78 (m, 3H) | 21.16  |
| 29                           | 0.78 d<br>(J=6.3)      | 17.8   | CH <sub>3</sub> | 0.71 (s, 3H)        | 17.46  |
| 11                           | -                      | 199.6  | C               | --                  | 199.26 |
| 24                           | -                      | 182.2  | C               | --                  | --     |
| CH <sub>3</sub> CO           | -                      | 170.5  | C               | --                  | 172.32 |
| CH <sub>2</sub> CO<br>LINKER | -                      | 166.5  | C               | --                  | 165.92 |
| 13                           | -                      | 165.3  | C               | --                  | 165.06 |
| 1'                           | --                     | 146.6  | C               | --                  | 150.55 |
| 2'                           | --                     | 144.03 | C               | --                  | 139.57 |
| 5'                           | --                     | 131.94 | C               | --                  | 136.91 |
| 4                            | -                      | 46.7   | C               | --                  | 45.01  |
| 14                           | -                      | 45.3   | C               | --                  | 43.8   |
| 8                            | -                      | 43.9   | C               | --                  | 41.95  |
| 10                           | -                      | 37.6   | C               | --                  | 37.1   |
| 17                           | -                      | 34.2   | C               | --                  | 33.96  |
| OH-                          | 5.6                    | -      |                 | --                  |        |
| O-C=N                        | --                     | 166    |                 |                     | 165.92 |
| S-C=N                        | --                     | 163    |                 |                     | 161.96 |

**Table S10 NMR assignment of compound 14b**

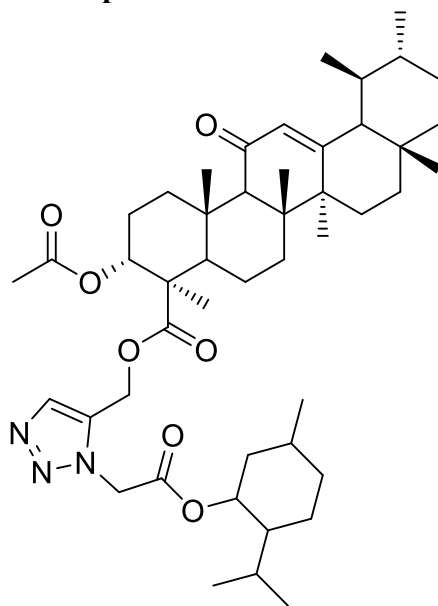

| Atom<br>C/H                          | Parent compound                           |     |                                         | Hybrid compound |                                           |     |                                      |
|--------------------------------------|-------------------------------------------|-----|-----------------------------------------|-----------------|-------------------------------------------|-----|--------------------------------------|
|                                      | <sup>1</sup> H<br>( $\delta$ ,<br>(J,Hz)) | ppm | <sup>13</sup> C<br>( $\delta$ ,<br>ppm) | DEPT            | <sup>1</sup> H<br>( $\delta$ ,<br>(J,Hz)) | ppm | <sup>13</sup> C<br>( $\delta$ , ppm) |
| 11                                   | -                                         |     | 199.6                                   | C               | --                                        |     | 199.33                               |
| 24                                   | -                                         |     | 182.2                                   | C               | --                                        |     | 175.63                               |
| CH <sub>3</sub> CO                   | -                                         |     | 170.5                                   | C               | --                                        |     | 170.23                               |
| -CH <sub>2</sub> -CO<br>MENTHOL      |                                           |     | 167.2                                   | C               |                                           |     | 165.53                               |
| 13                                   | -                                         |     | 165.3                                   | C               | --                                        |     | 165.09                               |
| CH=N<br>triazole                     | 8.0                                       |     | 142                                     | CH              | 7.78 (s, 1H)                              |     | 130.46                               |
| C=N<br>triazole                      | --                                        |     | <sup>124</sup>                          | C               | --                                        |     | 125.66                               |
| 12                                   | 5.54 s                                    |     | 130.8                                   | CH              | 5.55 (s, 1H)                              |     | 130.46                               |
| 3                                    | 5.28 t                                    |     | 73.6                                    | CH              | 5.35 – 5.23 (m,<br>1H)                    |     | 77.2                                 |
| Menthol<br>1(Kwan and<br>Huang 2008) | 3.4 td, (j=10.4,4.3)                      |     | 71.5                                    | CH              | 4.80 (td, J =<br>10.9, 4.4 Hz,<br>1H)     |     | 73.20                                |

|                           |                                   |       |                 |                                            |       |
|---------------------------|-----------------------------------|-------|-----------------|--------------------------------------------|-------|
| -CH <sub>2</sub> -CO      | 4.61-4.46 (2H, q, J=16.0, 16.2Hz) | 60.9  | CH <sub>2</sub> | 5.15 (d, J= 3.4 Hz, 2H)                    | 60.23 |
| 9                         | 2.39 s                            | 60.7  | CH              | 2.40 (s, 1H)                               | 59.02 |
| CH <sub>2</sub> -triazole | 5.23                              | 60    | CH <sub>2</sub> | 5.35 – 5.23 (m, 2H)                        | 58.50 |
| 18                        | 1.37 d (J=12.3)                   | 59.4  | CH              | 1.35 (s, 1H)                               | 57.38 |
| 5                         | 1.38 dd, (J=12,2)                 | 50.8  | CH              | 1.35 (s, 1H)                               | 51.08 |
| 8'                        | 1.1                               | 50.12 | CH              | 1.34 – 1.14 (m, 1H)                        | 50.46 |
| 4                         | -                                 | 46.7  | C               | --                                         | 46.83 |
| 14                        | -                                 | 45.3  | C               | --                                         | 46.71 |
| 3'                        | 1.9                               | 45    | CH              | 2.24 – 1.99 (m, 1H)                        | 45.04 |
| 10'                       | 0.95                              | 45    | CH              | 0.97 – 0.89 (m, 1H)                        | 45.04 |
| 8                         | -                                 | 43.9  | C               | --                                         | 43.76 |
| 22                        | 1.29 m                            | 41.3  | CH <sub>2</sub> | 1.34 – 1.14 (m, 2H)                        | 40.91 |
| 19                        | 1.52 m                            | 39.7  | CH              | 1.61 – 1.51 (m, 1H)                        | 40.64 |
| 20                        | 1.39 m                            | 39.6  | CH              | 1.35 (s, 1H)                               | 39.32 |
| 10                        | -                                 | 37.6  | C               | --                                         | 39.28 |
| 1                         | 2.53 dd, (J=13.2,2)               | 35.0  | CH <sub>2</sub> | 2.56 – 2.48 (m, 1H)<br>1.71 – 1.61 (m, 1H) | 37.23 |
| 13'                       | 0.84                              | 34.52 | CH              | 0.97 – 0.89 (m, 1H)                        | 34.54 |
| 4'                        | 1.66                              | 34.5  | CH              | 1.93 – 1.76 (m, 1H)                        | 33.98 |
| 17                        | -                                 | 34.2  | C               | --                                         | 32.77 |
| 15                        | 1.66 m                            | 33.2  | CH <sub>2</sub> | 1.75 – 1.71 (m, 2H)                        | 31.39 |
| 6'                        | 1.43                              | 31.6  | CH              | 1.54 – 1.36 (m, 1H)                        | 30.91 |
| 7                         | 1.43 m                            | 31.3  | CH <sub>2</sub> | 1.54 – 1.36 (m, 2H)                        | 28.85 |
| 30                        | 0.80 d (J=7.4)                    | 29.3  | CH <sub>3</sub> | 0.89 – 0.79 (m, 3H)                        | 27.51 |
| 21                        | 1.01 dd (J=11.8, 3)               | 27.9  | CH <sub>2</sub> | 0.97 – 0.89 (m, 2H)                        | 27.22 |

|                    |                   |      |                 |                         |       |
|--------------------|-------------------|------|-----------------|-------------------------|-------|
| 16                 | 1.88 m            | 27.6 | CH <sub>2</sub> | 2.24 – 1.99 (m, 2H)     | 26.29 |
| 2'                 | 2.17              | 25.8 | CH              | 2.24 – 1.99 (m, 1H)     | 23.72 |
| 23                 | 1.21 s            | 24.3 | CH <sub>3</sub> | 1.34 – 1.14 (m, 3H)     | 23.56 |
| 2                  | 1.56 m,<br>2.22 m | 23.9 | CH <sub>2</sub> | 1.75 – 1.71 (m, 2H)     | 23.30 |
| 5'                 | 1.61              | 23.1 | CH              | 1.75 – 1.71 (m, 1H)     | 21.94 |
| 9'                 | 0.97              | 23.1 | CH              | 0.97 – 0.89 (m, 1H)     | 21.94 |
| 12'                | 0.91              | 22.2 | CH <sub>3</sub> | 0.97 – 0.89 (m, 3H)     | 21.37 |
| CH <sub>3</sub> CO | 2.07 s            | 21.7 | CH <sub>3</sub> | 2.24 – 1.99 (m, 3H)     | 21.16 |
| 28                 | 0.93 s            | 21.5 | CH <sub>3</sub> | 0.97 – 0.89 (m, 3H)     | 20.73 |
| 11'                | 0.92              | 21   | CH <sub>3</sub> | 0.97 – 0.89 (m, 3H)     | 20.53 |
| 27                 | 1.33 s            | 20.9 | CH <sub>3</sub> | 1.34 – 1.14 (m, 3H)     | 18.82 |
| 6                  | 1.75 m            | 19.2 | CH <sub>2</sub> | 1.75 – 1.71 (m, 2H)     | 18.45 |
| 26                 | 1.17 s            | 18.8 | CH <sub>3</sub> | 1.34 – 1.14 (m, 3H)     | 18.29 |
| 29                 | 0.78 d<br>(J=6.3) | 17.8 | CH <sub>3</sub> | 0.76 (d, J= 6.9 Hz, 3H) | 17.43 |
| 14'                | 0.8               | 16   | CH <sub>3</sub> | 0.89 – 0.79 (m, 3H)     | 16.27 |
| 25                 | 1.12 s            | 13.6 | CH <sub>3</sub> | 1.11 – 0.97 (m, 3H)     | 13.20 |
| 7'                 | 1.35              | --   | --              | --                      | --    |

Table S11 NMR assignment of compound 14b

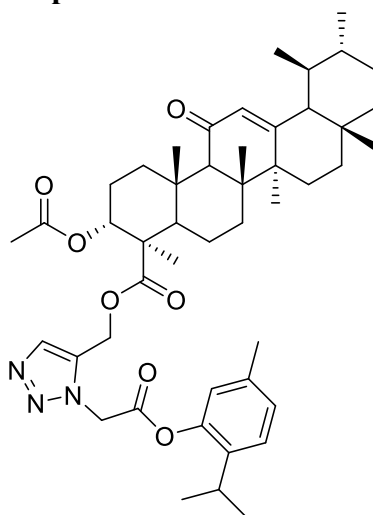

| Atom<br>C/H        | Parent compound                                  |                                      |                 | Hybrid compound                                             |                                      |  |
|--------------------|--------------------------------------------------|--------------------------------------|-----------------|-------------------------------------------------------------|--------------------------------------|--|
|                    | <sup>1</sup> H<br>( $\delta$ ,<br>(J,Hz)<br>ppm) | <sup>13</sup> C<br>( $\delta$ , ppm) | DEPT            | <sup>1</sup> H<br>( $\delta$ ,<br>(J,Hz)<br>ppm)            | <sup>13</sup> C<br>( $\delta$ , ppm) |  |
| OH-                | 9.99                                             | -                                    |                 | --                                                          | --                                   |  |
| CH=N<br>triazole   | 8.0                                              | 142                                  | CH              | 7.77 (s, 1H)                                                | 142.96                               |  |
| 5'                 | 7.08                                             | 126.3                                | CH              | 7.13 (d, $J = 7.9$ Hz, 1H)                                  | 127.92                               |  |
| 4'                 | 6.19                                             | 123.6                                | CH              | 6.98 (d, $J = 8.0$ Hz, 1H)                                  | 126.70                               |  |
| 12                 | 5.54 s                                           | 130.8                                | CH              | 5.45 (s, 1H)                                                | 130.45                               |  |
| 2'                 | 5.4                                              | 116.9                                | CH              | 6.77 (s, 1H)                                                | 122.14                               |  |
| 3                  | 5.28 t                                           | 73.6                                 | CH              | 5.22 (d, $J = 5.4$ Hz, 3H)                                  | 73.19                                |  |
| CH2-triazole       | 5.23                                             | 60                                   | CH <sub>2</sub> | 5.39 – 5.35 (m, 2H)                                         | 50.87                                |  |
| 7'                 | 3.38                                             | 25.5                                 | CH              | 2.81 (p, $J = 6.9$ Hz, 1H)                                  | 23.72                                |  |
| 1                  | 2.53 dd,<br>( $J=13.2,2$ )                       | 35.0                                 | CH <sub>2</sub> | 2.41 (dd, $J = 13.5,$<br>3.4 Hz, 1H)<br>2.20 – 1.93 (m, 1H) | 34.53                                |  |
| 9                  | 2.39 s                                           | 60.7                                 | CH              | 2.35 – 2.22 (m, 1H)                                         | 60.21                                |  |
| 10'                | 2.2                                              | 18.7                                 | CH <sub>3</sub> | 2.35 – 2.22 (m, 3H)                                         | 18.22,                               |  |
| CH <sub>3</sub> CO | 2.07 s                                           | 21.7                                 | CH <sub>3</sub> | 2.20 – 1.93 (m, 3H)                                         | 21.38                                |  |
| 16                 | 1.88 m                                           | 27.6                                 | CH <sub>2</sub> | 2.20 – 1.93 (m, 2H)                                         | 27.20                                |  |
| 6                  | 1.75 m                                           | 19.2                                 | CH <sub>2</sub> | 1.83 – 1.31 (m, 2H)                                         | 20.53                                |  |
| 15                 | 1.66 m                                           | 33.2                                 | CH <sub>2</sub> | 1.83 – 1.31 (m, 2H)                                         | 32.75                                |  |



|                           |                                       |                |                 |                                            |             |
|---------------------------|---------------------------------------|----------------|-----------------|--------------------------------------------|-------------|
| 2                         | 1.56 m,<br>2.22 m                     | 23.9           | CH <sub>2</sub> | 2.35 – 2.22 (m, 1H)<br>1.83 – 1.31 (m, 1H) | 23.03       |
| 19                        | 1.52 m                                | 39.7           | CH              | 1.83 – 1.31 (m, 1H)                        | 39.32       |
| 7                         | 1.43 m                                | 31.3           | CH <sub>2</sub> | 1.83 – 1.31 (m, 2H)                        | 30.92       |
| 20                        | 1.39 m                                | 39.6           | CH              | 1.30 – 1.22 (m, 1H)                        | 39.29       |
| 5                         | 1.38 dd,<br>(J=12,2)                  | 50.8           | CH              | 1.30 – 1.22 (m, 1H)                        | 50.45       |
| 18                        | 1.37 d<br>(J=12.3)                    | 59.4           | CH              | 1.30 – 1.22 (m, 1H)                        | 57.44       |
| 27                        | 1.33 s                                | 20.9           | CH <sub>3</sub> | 1.19 – 1.01 (m, 3H)                        | 20.83       |
| 22                        | 1.29 m                                | 41.3           | CH <sub>2</sub> | 1.30 – 1.22 (m, 2H)                        | 40.9        |
| 23                        | 1.21 s                                | 24.3           | CH <sub>3</sub> | 1.19 – 1.01 (m, 3H)                        | 23.55       |
| 26                        | 1.17 s                                | 18.8           | CH <sub>3</sub> | 1.19 – 1.02 (m, 3H)                        | 18.8        |
| 25                        | 1.12 s                                | 13.6           | CH <sub>3</sub> | 0.95 – 0.85 (m, 3H)                        | 13.20.      |
| 8',9'                     | 1.05                                  | 23.6-<br>26.1  | CH <sub>3</sub> | 1.19 – 1.02 (m, 6H)                        | 23.03-27.16 |
| 21                        | 1.01 dd<br>(J=11.8, 3)                | 27.9           | CH <sub>2</sub> | 0.95 – 0.85 (m, 2H)                        | 27.51       |
| 28                        | 0.93 s                                | 21.5           | CH <sub>3</sub> | 0.83 (s, 3H)                               | 21.17       |
| 30                        | 0.80 d<br>(J=7.4)                     | 29.3           | CH <sub>3</sub> | 0.78 – 0.69 (m, 3H)                        | 28.88       |
| 29                        | 0.78 d<br>(J=6.3)                     | 17.8           | CH <sub>3</sub> | 0.78 – 0.69 (m, 3H)                        | 17.44       |
| 11                        | -                                     | 199.6          | C               | --                                         | 199.3       |
| 24                        | -                                     | 182.2          | C               | --                                         | 175.63      |
| CH <sub>3</sub> CO        | -                                     | 170.5          | C               | --                                         | 170.24      |
| CH <sub>2</sub> CO LINKER | -                                     | 166.5          | C               | --                                         | 165.07      |
| 13                        | -                                     | 165.3          | C               | --                                         | 164.86      |
| 1'                        | -                                     | 150.2          | C               | --                                         | 147.09      |
| 3'                        | -                                     | 138.4          | C               | --                                         | 136.95      |
| 6'                        | --                                    | 131.7          | C               | --                                         | 136.67      |
| C=N<br>triazole           | --                                    | <sup>124</sup> | C               | --                                         | 125.61      |
| CH <sub>2</sub> -CO       | 4.90-4.73 (2H, q,<br>J=16.0, 16.1 Hz, | 60.7           | CH <sub>2</sub> | 5.22 (q, J = 6.6 Hz,<br>3H)                | 59.03       |
| 4                         | -                                     | 46.7           | C               | --                                         | 46.71       |
| 14                        | -                                     | 45.3           | C               | --                                         | 45.01       |
| 8                         | -                                     | 43.9           | C               | --                                         | 43.75       |
| 10                        | -                                     | 37.6           | C               | --                                         | 37.21       |

Table S12 NMR assignment of compound 14c

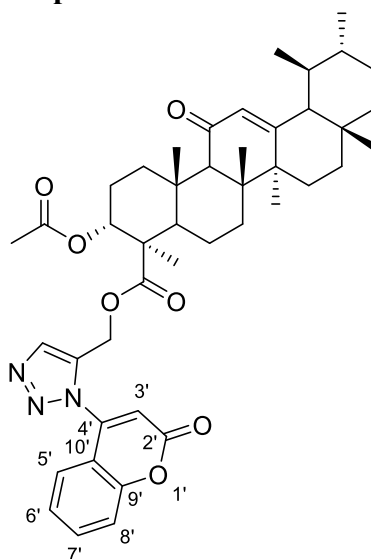

| Parent compound    |                                               |                                      | Hybrid compound |                                     |               |
|--------------------|-----------------------------------------------|--------------------------------------|-----------------|-------------------------------------|---------------|
| Atom<br>C/H        | <sup>1</sup> H<br>( $\delta$ ,<br>(J,Hz) ppm) | <sup>13</sup> C<br>( $\delta$ , ppm) | DEPT            | PMR                                 | C13           |
| 11                 | -                                             | 199.6                                | C               | -                                   | 199.21        |
| 24                 | -                                             | 182.2                                | C               | -                                   | 175.6         |
| CH <sub>3</sub> CO | -                                             | 170.5                                | C               | -                                   | 170.25        |
| 2'                 | --                                            | 166.1                                | C               | --                                  | 165.19        |
| 13                 | -                                             | 165.3                                | C               | -                                   | 165.19        |
| 4'                 | --                                            | 162.32                               | C               | --                                  | 159.8         |
| 9'                 | --                                            | 153.98                               | C               | --                                  | 154.26        |
| C=N                | --                                            | <sup>142</sup>                       |                 | --                                  | 146.6         |
| 7'                 | 7.65 (d, $J = 7.8$<br>Hz, 1H)                 | 133.17                               | CH              | 7.62 (dd, $J = 7.4$<br>Hz, 1H)      | 133.76        |
| 12                 | 5.54 s                                        | 130.8                                | CH              | 5.46 (s, 1H)                        | 130.4         |
| 6'                 | 7.38<br>7.34 (m, 1H)                          | 124.39                               | CH              | 7.41 (d, $J = 8.2$ Hz,<br>1H)       | 125.29        |
| CH=N               | <sup>8</sup>                                  | <sup>124</sup>                       | CH              | 8.05 (s, 1H)                        | 125.19        |
| 5'                 | 7.83 (d, $J = 7.2$<br>Hz, 1H)                 | 123.66                               | CH              | 7.70 (dd, $J = 8.2,$<br>1.5 Hz, 1H) | <b>125.19</b> |
| 8'                 | 7.38<br>7.34 (m, 1H)                          | 116.7                                | CH              | 7.30 (t, $J = 7.7$ Hz,<br>1H)       | 117.79        |

|                    |                        |        |                 |                                    |        |
|--------------------|------------------------|--------|-----------------|------------------------------------|--------|
| 10'                | --                     | 116.27 | C               |                                    | 114.29 |
| 3'                 | 5.60 (s, 1H)           | 91.46  | CH              | 6.50 (s, 1H)                       | 110.34 |
| 3                  | 5.28 t                 | 73.6   | CH              | 5.29 – 5.21 (m, 1H)                | 72.98  |
| 9                  | 2.39 s                 | 60.7   | CH              | 2.33 (s, 1H)                       | 60.14  |
| CH <sub>2</sub> CO | 5.3                    | 60     | CH <sub>2</sub> | 5.31 (s, 2H)                       | 59.02  |
| 18                 | 1.37 d<br>(J=12.3)     | 59.4   | CH              | 1.38 – 1.19 (m,<br>1H)             | 57.03  |
| 5                  | 1.38 dd,<br>(J=12,2)   | 50.8   | CH              | 1.38 – 1.19 (m, 1H)                | 50.48  |
| 4                  | -                      | 46.7   | C               | -                                  | 46.81  |
| 14                 | -                      | 45.3   | C               | -                                  | 45.03  |
| 8                  | -                      | 43.9   | C               | -                                  | 43.77  |
| 22                 | 1.29 m<br>1.46 m       | 41.3   | CH <sub>2</sub> | 0.98 – 0.91 (m, 2H)                | 40.89  |
| 19                 | 1.52 m                 | 39.7   | CH              | 1.57 – 1.38 (m, 1H)                | 39.32  |
| 20                 | 1.39 m                 | 39.6   | CH              | 1.38 – 1.19 (m, 1H)                | 39.27  |
| 10                 | -                      | 37.6   | C               |                                    | 37.23  |
| 1                  | 2.53 dd,<br>(J=13.2,2) | 35.0   | CH <sub>2</sub> | 2.43 (dt, J = 13.4,<br>3.5 Hz, 2H) | 34.46  |
| 17                 | -                      | 34.2   | C               |                                    | 33.97  |
| 15                 | 1.66 m                 | 33.2   | CH <sub>2</sub> | 1.57 – 1.38<br>(m, 2H)             | 32.7   |
| 7                  | 1.43 m                 | 31.3   | CH <sub>2</sub> | 1.38 – 1.19 (m, 2H)                | 30.90  |
| 30                 | 0.80 d<br>(J=7.4)      | 29.3   | CH <sub>3</sub> | 0.89 – 0.82 (m, 3H)                | 28.86  |
| 21                 | 1.01 dd<br>(J=11.8, 3) | 27.9   | CH <sub>2</sub> | 0.77 – 0.69 (m, 2H)                | 27.49  |
| 16                 | 1.88 m                 | 27.6   | CH <sub>2</sub> | 1.74 – 1.57 (m, 2H)                | 27.22  |
| 23                 | 1.21 s                 | 24.3   | CH <sub>3</sub> | 1.19 – 1.06 (m, 3H)                | 23.81  |
| 2                  | 1.56 m,<br>2.22 m      | 23.9   | CH <sub>2</sub> | 2.31 – 2.01 (m, 2H)                | 23.59  |
| CH <sub>3</sub> CO | 2.07 s                 | 21.7   | CH <sub>3</sub> | 2.02 (s, 3H)                       | 21.37  |
| 28                 | 0.93 s                 | 21.5   | CH <sub>3</sub> | 0.89 – 0.82 (m, 3H)                | 21.16  |
| 27                 | 1.33 s                 | 20.9   | CH <sub>3</sub> | 1.38 – 1.19 (m, 3H)                | 20.5   |
| 6                  | 1.75 m                 | 19.2   | CH <sub>2</sub> | 1.57 – 1.38 (m, 2H)                | 18.8   |
| 26                 | 1.17 s                 | 18.8   | CH <sub>3</sub> | 1.19 – 1.06 (m, 3H)                | 18.3   |
| 29                 | 0.78 d<br>(J=6.3)      | 17.8   | CH <sub>3</sub> | 0.77 – 0.69 (m, 3H)                | 17.43  |
| 25                 | 1.12 s                 | 13.6   | CH <sub>3</sub> | 1.19 – 1.06 (m, 3H)                | 13.3   |
| 4-OH               | 12.53                  | -      | -               | --                                 | --     |

Table S13 NMR assignment of compound 16a

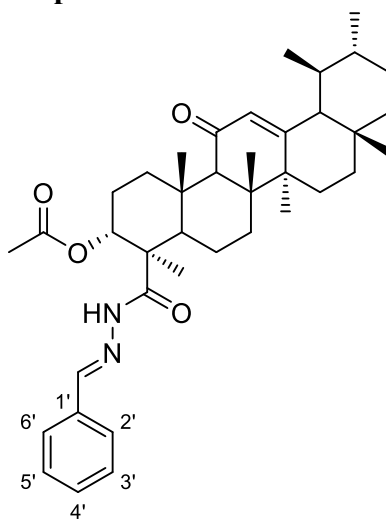

| Atom<br>C/H        | Parent compound                           |     |                                      | Hybrid compound |                                           |     |                                      |
|--------------------|-------------------------------------------|-----|--------------------------------------|-----------------|-------------------------------------------|-----|--------------------------------------|
|                    | <sup>1</sup> H<br>( $\delta$ ,<br>(J,Hz)) | ppm | <sup>13</sup> C<br>( $\delta$ , ppm) | DEPT            | <sup>1</sup> H<br>( $\delta$ ,<br>(J,Hz)) | ppm | <sup>13</sup> C<br>( $\delta$ , ppm) |
| 11                 | -                                         |     | 199.6                                | C               | --                                        |     | 199.23                               |
| CHO/CH=N           | 10.2                                      |     | 189.37                               | CH              | 8.54 (s, 1H)                              |     | 143.45                               |
| 24                 | -                                         |     | 182.2                                | C               | -                                         |     | 162.75                               |
| CH <sub>3</sub> CO | -                                         |     | 170.5                                | C               | -                                         |     | 173.16                               |
| 13                 | --                                        |     | 165.3                                | C               | --                                        |     | 164.94                               |
| 2'                 | --                                        |     | 156.73                               | C               | --                                        |     | 153.98                               |
| 5'                 | --                                        |     | 153.69                               | C               | --                                        |     | 152.92                               |
| 12                 | 5.54 s                                    |     | 130.8                                | CH              | 5.54 (s, 1H)                              |     | 130.64                               |
| 1'                 | --                                        |     | 125.03                               | C               | -                                         |     | 130.64                               |
| 4'                 | 7.78                                      |     | 123.29                               | CH              | 7.56 (d, $J = 3.1$ Hz, 1H)                |     | 121.96                               |
| 6'                 | 6.4                                       |     | 113.38                               | CH              | 6.84 (d, $J = 9.1$ Hz, 1H)                |     | 119.71                               |
| 3'                 | 6.5                                       |     | 110.60                               | CH              | 6.93 (dd, $J = 9.1, 3.1$ Hz, 1H)          |     | 112.67                               |
| 3                  | 5.28 t                                    |     | 73.6                                 | CH              | 4.24 (s, 1H)                              |     | 70.51                                |
| 9                  | 2.39 s                                    |     | 60.7                                 | CH              | 2.57 – 2.38 (m, 1H)                       |     | 60.56                                |
| 18                 | 1.37 d<br>( $J=12.3$ )                    |     | 59.4                                 | CH              | 1.39 – 1.30 (m, 1H)                       |     | 59.12                                |
| OCH <sub>3</sub>   | 3.8                                       |     | 56.17                                | CH <sub>3</sub> | 3.84 (s, 3H)                              |     | 56.36                                |
| OCH <sub>3</sub>   | 3.8                                       |     | 56.16                                | CH <sub>3</sub> | 3.80 (s, 3H)                              |     | 56.15                                |
| 5                  | 1.38 dd,<br>( $J=12,2$ )                  |     | 50.8                                 | CH              | 1.04 – 0.89(m, 1H)                        |     | 49.04                                |
| 4                  | -                                         |     | 46.7                                 | C               | -                                         |     | 47.48                                |
| 14                 | -                                         |     | 45.3                                 | C               | -                                         |     | 45.16                                |

|                    |                           |      |                 |                     |       |
|--------------------|---------------------------|------|-----------------|---------------------|-------|
| 8                  | -                         | 43.9 | C               | -                   | 43.94 |
| 22                 | 1.29 m<br>1.46 m          | 41.3 | CH <sub>2</sub> | 1.39 – 1.30 (m, 2H) | 41.01 |
| 19                 | 1.52 m                    | 39.7 | CH              | 1.93 – 1.71 (m, 1H) | 39.42 |
| 20                 | 1.39 m                    | 39.6 | CH              | 1.64 – 1.39 (m, 1H) | 39.38 |
| 10                 | -                         | 37.6 | C               |                     | 37.66 |
| 1                  | 2.53<br>dd,<br>(J=13.2,2) | 35.0 | CH <sub>2</sub> | 2.57 – 2.38 (m, 2H) | 36.67 |
| 17                 | -                         | 34.2 | C               | --                  | 34.30 |
| 15                 | 1.66 m                    | 33.2 | CH <sub>2</sub> | 1.64 – 1.39 (m, 2H) | 34.09 |
| 7                  | 1.43 m                    | 31.3 | CH <sub>2</sub> | 1.39 – 1.30 (m, 2H) | 33.30 |
| 30                 | 0.80 d<br>(J=7.4)         | 29.3 | CH <sub>3</sub> | 0.83 – 0.75 (m, 3H) | 31.02 |
| 21                 | 1.01 dd<br>(J=11.8, 3)    | 27.9 | CH <sub>2</sub> | 1.04 – 0.89 (s, 2H) | 28.99 |
| 16                 | 1.88 m                    | 27.6 | CH <sub>2</sub> | 1.64 – 1.39 (m, 2H) | 27.61 |
| 23                 | 1.21 s                    | 24.3 | CH <sub>3</sub> | 1.31 – 1.11 (m, 3H) | 27.27 |
| 2                  | 1.56 m,<br>2.22 m         | 23.9 | CH <sub>2</sub> | 2.15 – 2.01 (m, 2H) | 26.71 |
| CH <sub>3</sub> CO | 2.07 s                    | 21.7 | CH <sub>3</sub> | 1.93 – 1.71 (m, 3H) | 24.80 |
| 28                 | 0.93 s                    | 21.5 | CH <sub>3</sub> | 1.04 – 0.89 (s, 3H) | 21.25 |
| 27                 | 1.33 s                    | 20.9 | CH <sub>3</sub> | 1.39 – 1.30 (m, 3H) | 20.62 |
| 6                  | 1.75 m                    | 19.2 | CH <sub>2</sub> | 1.64 – 1.39 (m, 2H) | 20.03 |
| 26                 | 1.17 s                    | 18.8 | CH <sub>3</sub> | 1.31 – 1.11 (m, 3H) | 18.48 |
| 29                 | 0.78 d<br>(J=6.3)         | 17.8 | CH <sub>3</sub> | 0.83 – 0.75 (m, 3H) | 17.55 |
| 25                 | 1.12 s                    | 13.6 | CH <sub>3</sub> | 1.31 – 1.11 (m, 3H) | 13.90 |
| NH                 | 11.25                     | --   | NH              | 8.86 (s, 1H)        |       |

Table S14 NMR assignment of compound 16b

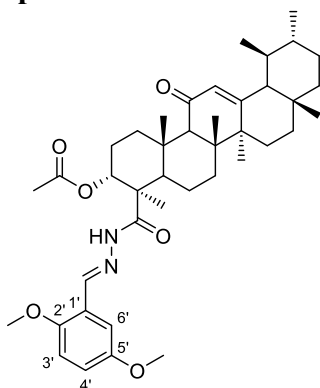

| Parent compound    |                                          |                                     | Hybrid compound |                                      |                                      |
|--------------------|------------------------------------------|-------------------------------------|-----------------|--------------------------------------|--------------------------------------|
| Atom<br>C/H        | <sup>1</sup> H<br>( $\delta$ ,ppm)(J,Hz) | <sup>13</sup> C<br>( $\delta$ ,ppm) | DEPT            | <sup>1</sup> H( $\delta$ ,ppm)(J,Hz) | <sup>13</sup> C<br>( $\delta$ , ppm) |
| 11                 | -                                        | 199.6                               | C               | --                                   | 199.23                               |
| CHO/CH=N           | 10.2                                     | 189.37                              | CH              | 8.54 (s, 1H)                         | 143.45                               |
| 24                 | -                                        | 182.2                               | C               | -                                    | 162.75                               |
| CH <sub>3</sub> CO | -                                        | 170.5                               | C               | -                                    | 173.16                               |
| 13                 | --                                       | 165.3                               | C               | --                                   | 164.94                               |
| 2'                 | --                                       | 156.73                              | C               | --                                   | 153.98                               |
| 5'                 | --                                       | 153.69                              | C               | --                                   | 152.92                               |
| 12                 | 5.54 s                                   | 130.8                               | CH              | 5.54 (s, 1H)                         | 130.64                               |
| 1'                 | --                                       | 125.03                              | C               | -                                    | 130.64                               |
| 4'                 | 7.78                                     | 123.29                              | CH              | 7.56 (d, $J = 3.1$ Hz, 1H)           | 121.96                               |
| 6'                 | 6.4                                      | 113.38                              | CH              | 6.84 (d, $J = 9.1$ Hz, 1H)           | 119.71                               |
| 3'                 | 6.5                                      | 110.60                              | CH              | 6.93 (dd, $J = 9.1, 3.1$ Hz, 1H)     | 112.67                               |
| 3                  | 5.28 t                                   | 73.6                                | CH              | 4.24 (s, 1H)                         | 70.51                                |
| 9                  | 2.39 s                                   | 60.7                                | CH              | 2.57 – 2.38 (m, 1H)                  | 60.56                                |
| 18                 | 1.37 d<br>( $J=12.3$ )                   | 59.4                                | CH              | 1.39 – 1.30 (m, 1H)                  | 59.12                                |
| OCH <sub>3</sub>   | 3.8                                      | 56.17                               | CH <sub>3</sub> | 3.84 (s, 3H)                         | 56.36                                |
| OCH <sub>3</sub>   | 3.8                                      | 56.16                               | CH <sub>3</sub> | 3.80 (s, 3H)                         | 56.15                                |
| 5                  | 1.38 dd, ( $J=12,2$ )                    | 50.8                                | CH              | 1.04 – 0.89(m, 1H)                   | 49.04                                |
| 4                  | -                                        | 46.7                                | C               | -                                    | 47.48                                |
| 14                 | -                                        | 45.3                                | C               | -                                    | 45.16                                |
| 8                  | -                                        | 43.9                                | C               | -                                    | 43.94                                |
| 22                 | 1.29 -1.46 m                             | 41.3                                | CH <sub>2</sub> | 1.39 – 1.30 (m, 2H)                  | 41.01                                |
| 19                 | 1.52 m                                   | 39.7                                | CH              | 1.93 – 1.71 (m, 1H)                  | 39.42                                |
| 20                 | 1.39 m                                   | 39.6                                | CH              | 1.64 – 1.39 (m, 1H)                  | 39.38                                |
| 10                 | -                                        | 37.6                                | C               |                                      | 37.66                                |
| 1                  | 2.53 dd, ( $J=13.2,2$ )                  | 35.0                                | CH <sub>2</sub> | 2.57 – 2.38 (m, 2H)                  | 36.67                                |

|                    |                    |      |                 |                     |       |
|--------------------|--------------------|------|-----------------|---------------------|-------|
| 17                 | -                  | 34.2 | C               | --                  | 34.30 |
| 15                 | 1.66 m             | 33.2 | CH <sub>2</sub> | 1.64 – 1.39 (m, 2H) | 34.09 |
| 7                  | 1.43 m             | 31.3 | CH <sub>2</sub> | 1.39 – 1.30 (m, 2H) | 33.30 |
| 30                 | 0.80 d (J=7.4)     | 29.3 | CH <sub>3</sub> | 0.83 – 0.75 (m, 3H) | 31.02 |
| 21                 | 1.01 dd(J=11.8, 3) | 27.9 | CH <sub>2</sub> | 1.04 – 0.89 (s, 2H) | 28.99 |
| 16                 | 1.88 m             | 27.6 | CH <sub>2</sub> | 1.64 – 1.39 (m, 2H) | 27.61 |
| 23                 | 1.21 s             | 24.3 | CH <sub>3</sub> | 1.31 – 1.11 (m, 3H) | 27.27 |
| 2                  | 1.56 - 2.22 m      | 23.9 | CH <sub>2</sub> | 2.15 – 2.01 (m, 2H) | 26.71 |
| CH <sub>3</sub> CO | 2.07 s             | 21.7 | CH <sub>3</sub> | 1.93 – 1.71 (m, 3H) | 24.80 |
| 28                 | 0.93 s             | 21.5 | CH <sub>3</sub> | 1.04 – 0.89 (s, 3H) | 21.25 |
| 27                 | 1.33 s             | 20.9 | CH <sub>3</sub> | 1.39 – 1.30 (m, 3H) | 20.62 |
| 6                  | 1.75 m             | 19.2 | CH <sub>2</sub> | 1.64 – 1.39 (m, 2H) | 20.03 |
| 26                 | 1.17 s             | 18.8 | CH <sub>3</sub> | 1.31 – 1.11 (m, 3H) | 18.48 |
| 29                 | 0.78 d (J=6.3)     | 17.8 | CH <sub>3</sub> | 0.83 – 0.75 (m, 3H) | 17.55 |
| 25                 | 1.12 s             | 13.6 | CH <sub>3</sub> | 1.31 – 1.11 (m, 3H) | 13.90 |
| NH                 | 11.25              | --   | NH              | 8.86 (s, 1H)        |       |

Table S15 NMR assignment of compound 16b

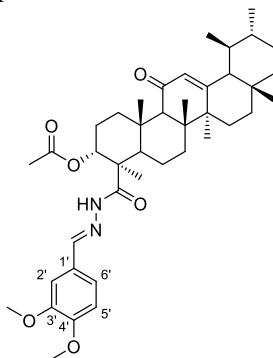

| Parent compound    |                             |                            | Hybrid compound |                                |                             |
|--------------------|-----------------------------|----------------------------|-----------------|--------------------------------|-----------------------------|
| Atom<br>C/H        | <sup>1</sup> H(δ,ppm)(J,Hz) | <sup>13</sup> C<br>(δ,ppm) | DEPT            | <sup>1</sup> H(δ,ppm)(J,Hz)    | <sup>13</sup> C<br>(δ, ppm) |
| 11                 | -                           | 199.6                      | C               | --                             | 199.14                      |
| CHO/CH=N           | 10.2                        | 189.37                     | CH              | 8.54 (s, 1H)                   | 148.05                      |
| 24                 | -                           | 182.2                      | C               | -                              | 164.88                      |
| CH <sub>3</sub> CO | -                           | 170.5                      | C               | -                              | 173.12                      |
| 13                 | --                          | 165.3                      | C               | --                             | 164.88                      |
| 4'                 | --                          | 154.61                     | CH              | --                             | 151.25                      |
| 3'                 | --                          | 149.73                     | CH              | --                             | 149.40                      |
| 12                 | 5.54 s                      | 130.8                      | CH              | 5.48 (s, 1H)                   | 130.35                      |
| 1'                 | --                          | 130.27                     |                 | -                              | 126.65                      |
| 2'                 | 7.41                        | 110.62                     | CH              | 7.02 (dd, J = 8.3, 1.9 Hz, 1H) | 110.46                      |
| 6'                 | 7.47                        | 126.59                     | CH              | 7.38 (d, J = 1.9 Hz, 1H)       | 122.70                      |

|                    |                        |        |                 |                            |        |
|--------------------|------------------------|--------|-----------------|----------------------------|--------|
| 5'                 | 6.99                   | 109.29 | CH              | 6.78 (d, $J = 8.3$ Hz, 1H) | 108.26 |
| 3                  | 5.28 t                 | 73.6   | CH              | 4.17 (s, 1H)               | 70.42  |
| 9                  | 2.39 s                 | 60.7   | CH              | 2.50 – 2.36 (m, 1H)        | 60.45  |
| 18                 | 1.37 d ( $J=12.3$ )    | 59.4   | CH              | 1.33 – 1.28 (m, 1H)        | 59.01  |
| OCH3               | 3.8                    | 56.17  | CH <sub>3</sub> | 3.86 (s, 3H)               | 56.10  |
| OCH3               | 3.8                    | 56.16  | CH <sub>3</sub> | 3.83 (s, 3H)               | 55.93  |
| 5                  | 1.38 dd, ( $J=12.2$ )  | 50.8   | CH              | 0.97 – 0.85 (m, 1H)        | 48.91  |
| 4                  | -                      | 46.7   | C               | -                          | 47.40  |
| 14                 | -                      | 45.3   | C               | -                          | 45.05  |
| 8                  | -                      | 43.9   | C               | -                          | 43.84  |
| 22                 | 1.29 -1.46 m           | 41.3   | CH <sub>2</sub> | 1.26 – 1.17 (m, 2H)        | 40.90  |
| 19                 | 1.52 m                 | 39.7   | CH              | 1.55 – 1.38 (m, 1H)        | 39.32  |
| 20                 | 1.39 m                 | 39.6   | CH              | 1.33 – 1.28 (m, 1H)        | 39.27  |
| 10                 | -                      | 37.6   | C               |                            | 37.57  |
| 1                  | 2.53,dd,( $J=13.2,2$ ) | 35.0   | CH <sub>2</sub> | 2.50 – 2.36 (m, 2H)        | 34.23  |
| 17                 | -                      | 34.2   | C               | --                         | 33.9   |
| 15                 | 1.66 m                 | 33.2   | CH <sub>2</sub> | 1.55 – 1.38 (m, 2H)        | 33.99  |
| 7                  | 1.43 m                 | 31.3   | CH <sub>2</sub> | 1.33 – 1.28 (m, 2H)        | 33.22  |
| 30                 | 0.80 d ( $J=7.4$ )     | 29.3   | CH <sub>3</sub> | 0.77 – 0.69 (m, 3H)        | 30.91  |
| 21                 | 1.01 dd( $J=11.8, 3$ ) | 27.9   | CH <sub>2</sub> | 0.97 – 0.85 (s, 2H)        | 28.88  |
| 16                 | 1.88 m                 | 27.6   | CH <sub>2</sub> | 1.87 – 1.67 (m, 2H)        | 27.50  |
| 23                 | 1.21 s                 | 24.3   | CH <sub>3</sub> | 1.20 – 1.10 (m, 3H)        | 27.17  |
| 2                  | 1.56 -2.22 m           | 23.9   | CH <sub>2</sub> | 2.09 – 1.96 (m, 2H)        | 26.59  |
| CH <sub>3</sub> CO | 2.07 s                 | 21.7   | CH <sub>3</sub> | 1.87 – 1.67 (m, 3H)        | 24.78  |
| 28                 | 0.93 s                 | 21.5   | CH <sub>3</sub> | 0.97 – 0.85 (s, 3H)        | 21.15  |
| 27                 | 1.33 s                 | 20.9   | CH <sub>3</sub> | 1.26 – 1.17 (m, 3H)        | 20.51  |
| 6                  | 1.75 m                 | 19.2   | CH <sub>2</sub> | 1.55 – 1.38 (m, 2H)        | 19.93  |
| 26                 | 1.17 s                 | 18.8   | CH <sub>3</sub> | 1.20 – 1.10 (m, 3H)        | 18.37  |
| 29                 | 0.78 d ( $J=6.3$ )     | 17.8   | CH <sub>3</sub> | 0.77 – 0.69 (m, 3H)        | 17.45  |
| 25                 | 1.12 s                 | 13.6   | CH <sub>3</sub> | 1.20 – 1.10 (m, 3H)        | 13.82  |
| NH                 | 11.25                  | --     | NH              | 8.86 (s, 1H)               |        |



**Table S16 NMR assignment of compound 16c**

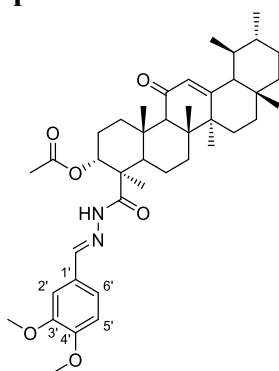

| Parent compound    |                             |                            | Hybrid compound |                             |                             |
|--------------------|-----------------------------|----------------------------|-----------------|-----------------------------|-----------------------------|
| Atom<br>C/H        | <sup>1</sup> H(δ,ppm)(J,Hz) | <sup>13</sup> C<br>(δ,ppm) | DEPT            | <sup>1</sup> H(δ,ppm)(J,Hz) | <sup>13</sup> C<br>(δ, ppm) |
| 11                 | -                           | 199.6                      | C               | --                          | 199.05                      |
| CHO/CH=N           | 10.2                        | 190.95                     | CH              | 8.27 (s, 1H)                | 148.12                      |
| 24                 | -                           | 182.2                      | C               | -                           | 164.85                      |
| CH <sub>3</sub> CO | -                           | 170.5                      | C               | -                           | 173.12                      |
| 13                 | --                          | 165.3                      | C               | --                          | 164.88                      |
| 5'                 | --                          | 153.72                     | CH              | --                          | 153.66                      |
| 3'                 | --                          | 153.72                     | CH              | --                          | 153.45                      |
| 4'                 | --                          | 143.72                     | CH              | --                          | 140.10                      |
| 1'                 | --                          | 131.84                     |                 | -                           | 130.54                      |
| 12                 | 5.54 s                      | 130.8                      | CH              | 5.57 (s, 1H)                | 129.18                      |
| 2'                 | 7.13                        | 106.81                     | CH              | 6.98 (s, 1H)                | 106.72                      |
| 6'                 | 7.13                        | 106                        | CH              | 6.98 (s, 1H)                | 104.70                      |
| 3                  | 5.28 t                      | 73.6                       | CH              | 4.25 (s, 1H)                | 70.47                       |
| OCH <sub>3</sub>   | 3.93                        | 60.93                      | CH <sub>3</sub> | 3.97 – 3.87 (m, 3H)         | 60.98                       |
| 9                  | 2.39 s                      | 60.7                       | CH              | 2.60 – 2.42 (m, 1H)         | 60.42                       |
| 18                 | 1.37 d(J=12.3)              | 59.4                       | CH              | 1.29 – 1.14(m, 1H)          | 59.02                       |
| OCH <sub>3</sub>   | 3.93                        | 57.27                      | CH <sub>3</sub> | 3.97 – 3.87 (m, 3H)         | 58.50                       |
| OCH <sub>3</sub>   | 3.93                        | 57.27                      | CH <sub>3</sub> | 3.97 – 3.87 (m, 3H)         | 56.31                       |
| 5                  | 1.38 dd,(J=12,2)            | 50.8                       | CH              | 1.41 – 1.29 (m, 1H)         | 48.87                       |
| 4                  | -                           | 46.7                       | C               | -                           | 47.47                       |
| 14                 | -                           | 45.3                       | C               | -                           | 45.04                       |
| 8                  | -                           | 43.9                       | C               | -                           | 43.84                       |
| 22                 | 1.29 -1.46 m                | 41.3                       | CH <sub>2</sub> | 1.41 – 1.29 (m, 2H)         | 40.90                       |
| 19                 | 1.52 m                      | 39.7                       | CH              | 1.95 – 1.73 (m, 1H)         | 39.33                       |
| 20                 | 1.39 m                      | 39.6                       | CH              | 1.41 – 1.29 (m, 1H)         | 39.27                       |
| 10                 | -                           | 37.6                       | C               |                             | 37.57                       |
| 1                  | 2.53dd,(J=13.2,2)           | 35.0                       | CH <sub>2</sub> | 2.60 – 2.42 (m, 2H)         | 34.20                       |
| 17                 | -                           | 34.2                       | C               | --                          | 34.00                       |

|                    |                   |      |                 |                                 |       |
|--------------------|-------------------|------|-----------------|---------------------------------|-------|
| 15                 | 1.66 m            | 33.2 | CH <sub>2</sub> | 1.41 – 1.29 (m, 2H)             | 34.00 |
| 7                  | 1.43 m            | 31.3 | CH <sub>2</sub> | 1.41 – 1.29 (m, 2H)             | 33.24 |
| 30                 | 0.80 d (J=7.4)    | 29.3 | CH <sub>3</sub> | 0.86 – 0.78 (m, 3H)             | 30.91 |
| 21                 | 1.0 dd(J=11.8, 3) | 27.9 | CH <sub>2</sub> | 1.05 – 0.94 (s, 2H)             | 28.89 |
| 16                 | 1.88 m            | 27.6 | CH <sub>2</sub> | 1.95 – 1.73 (m, 2H)             | 27.50 |
| 23                 | 1.21 s            | 24.3 | CH <sub>3</sub> | 1.29 – 1.14 (m, 3H)             | 27.18 |
| 2                  | 1.56 -2.22 m      | 23.9 | CH <sub>2</sub> | 2.11 (tt, J = 9.9, 4.8 Hz, 2H)  | 26.57 |
| CH <sub>3</sub> CO | 2.07 s            | 21.7 | CH <sub>3</sub> | 1.95 – 1.73 (m, 3H)             | 24.77 |
| 28                 | 0.93 s            | 21.5 | CH <sub>3</sub> | 1.05 – 0.94 (s, 3H)             | 21.15 |
| 27                 | 1.33 s            | 20.9 | CH <sub>3</sub> | 1.41 – 1.29 (m, 3H)             | 20.51 |
| 6                  | 1.75 m            | 19.2 | CH <sub>2</sub> | 1.48 (dt, J = 13.7, 8.0 Hz, 2H) | 19.99 |
| 26                 | 1.17 s            | 18.8 | CH <sub>3</sub> | 1.29 – 1.14 (m, 3H)             | 18.45 |
| 29                 | 0.78 d (J=6.3)    | 17.8 | CH <sub>3</sub> | 0.86 – 0.78 (m, 3H)             | 17.45 |
| 25                 | 1.12 s            | 13.6 | CH <sub>3</sub> | 1.29 – 1.14 (m, 3H)             | 13.82 |
| NH                 | 11.25             | --   | NH              | 8.60 (s, 1H)                    |       |

Table S17 NMR assignment of compound 16d

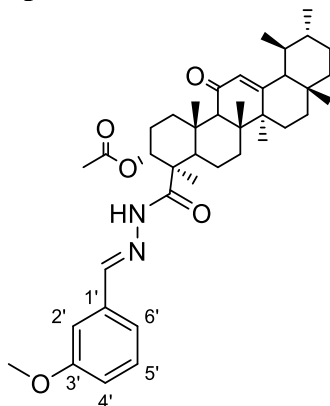

| Parent compound    |                             |                         | Hybrid compound |                             |                          |
|--------------------|-----------------------------|-------------------------|-----------------|-----------------------------|--------------------------|
| Atom C/H           | <sup>1</sup> H(δ,ppm)(J,Hz) | <sup>13</sup> C (δ,ppm) | DEPT            | <sup>1</sup> H(δ,ppm)(J,Hz) | <sup>13</sup> C (δ, ppm) |
| 11                 | -                           | 199.6                   | C               | --                          | 199.22                   |
| CHO/CH=N           | 10.2                        | 190.95                  | CH              | 8.17 (s, 1H)                | 147.95                   |
| 24                 | -                           | 182.2                   | C               | -                           | 164.98                   |
| CH <sub>3</sub> CO | -                           | 170.5                   | C               | -                           | 173.40                   |
| 13                 | --                          | 165.3                   | C               | --                          | 164.98                   |
| 3'                 | --                          | 160.15                  | CH              | --                          | 159.99                   |
| 1'                 | --                          | 137.79                  | C               | -                           | 135.19                   |
| 12                 | 5.54 s                      | 130.8                   | CH              | 5.48 (s, 1H)                | 130.64                   |
| 5'                 | 7.44                        | 130.05                  | CH              | 7.29 – 7.21 (m, 1H)         | 129.75                   |
| 6'                 | 7.44                        | 123.57                  | CH              | 7.29 – 7.21 (m, 1H)         | 121.12                   |

|                    |                       |        |                 |                                            |        |
|--------------------|-----------------------|--------|-----------------|--------------------------------------------|--------|
| 4'                 | 7.18                  | 121.25 | CH              | 6.87 (dd, $J = 8.2, 2.6$ Hz, 1H)           | 117.55 |
| 2'                 | 7.37                  | 112.05 | CH              | 7.15 (d, $J = 7.5$ Hz, 1H)                 | 111.02 |
| 3                  | 5.28 t                | 73.6   | CH              | 4.17 (s, 1H)                               | 70.53  |
| 9                  | 2.39 s                | 60.7   | CH              | 2.50 – 2.35 (m, 1H)                        | 60.55  |
| 18                 | 1.37 d( $J=12.3$ )    | 59.4   | CH              | 1.34 – 1.21 (m, 1H)                        | 59.13  |
| OCH <sub>3</sub>   | 3.85                  | 55.48  | CH <sub>3</sub> | 3.76 (s, 3H)                               | 55.58  |
| 5                  | 1.38 dd( $J=12,2$ )   | 50.8   | CH              | 1.34 – 1.21 (m, 1H)                        | 49.02  |
| 4                  | -                     | 46.7   | C               | -                                          | 47.57  |
| 14                 | -                     | 45.3   | C               | -                                          | 45.16  |
| 8                  | -                     | 43.9   | C               | -                                          | 43.95  |
| 22                 | 1.29 m<br>1.46 m      | 41.3   | CH <sub>2</sub> | 1.34 – 1.21 (m, 1H)<br>1.20 – 1.15 (m, 1H) | 41.01  |
| 19                 | 1.52 m                | 39.7   | CH              | 1.34 – 1.21 (m, 1H)                        | 39.43  |
| 20                 | 1.39 m                | 39.6   | CH              | 1.34 – 1.21 (m, 1H)                        | 39.38  |
| 10                 | -                     | 37.6   | C               |                                            | 37.68  |
| 1                  | 2.53dd, $(J=13.2,2)$  | 35.0   | CH <sub>2</sub> | 2.50 – 2.35 (m, 2H)                        | 34.32  |
| 17                 | -                     | 34.2   | C               | --                                         | 34.10  |
| 15                 | 1.66 m                | 33.2   | CH <sub>2</sub> | 1.57 – 1.35 (m, 2H)                        | 34.00  |
| 7                  | 1.43 m                | 31.3   | CH <sub>2</sub> | 1.57 – 1.35 (m, 2H)                        | 33.32  |
| 30                 | 0.80 d( $J=7.4$ )     | 29.3   | CH <sub>3</sub> | 0.77 – 0.69 (m, 3H)                        | 31.02  |
| 21                 | 1.01dd( $J=11.8, 3$ ) | 27.9   | CH <sub>2</sub> | 0.98 – 0.85 (m, 2H)                        | 28.99  |
| 16                 | 1.88 m                | 27.6   | CH <sub>2</sub> | 1.86 – 1.65 (m, 2H)                        | 27.61  |
| 23                 | 1.21 s                | 24.3   | CH <sub>3</sub> | 1.15 – 1.08 (m, 9H)                        | 27.28  |
| 2                  | 1.56-,2.22 m          | 23.9   | CH <sub>2</sub> | 2.50 – 2.35 (m, 1H)<br>2.08 – 1.95 (m, 1H) | 26.68  |
| CH <sub>3</sub> CO | 2.07 s                | 21.7   | CH <sub>3</sub> | 1.86 – 1.65 (m, 3H)                        | 24.80  |
| 28                 | 0.93 s                | 21.5   | CH <sub>3</sub> | 0.98 – 0.85 (m, 3H)                        | 21.26  |
| 27                 | 1.33 s                | 20.9   | CH <sub>3</sub> | 1.34 – 1.21 (m, 3H)                        | 20.60  |
| 6                  | 1.75 m                | 19.2   | CH <sub>2</sub> | 1.57 – 1.35 (m, 2H)                        | 20.05  |
| 26                 | 1.17 s                | 18.8   | CH <sub>3</sub> | 1.15 – 1.08 (m, 9H)                        | 18.47  |
| 29                 | 0.78 d( $J=6.3$ )     | 17.8   | CH <sub>3</sub> | 0.77 – 0.69 (m, 3H)                        | 17.56  |
| 25                 | 1.12 s                | 13.6   | CH <sub>3</sub> | 1.15 – 1.08 (m, 9H)                        | 17.56  |
| NH                 | 11.25                 | --     | NH              | 8.59 (s, 1H)                               |        |

**Table S18 NMR assignment of compound 16f**

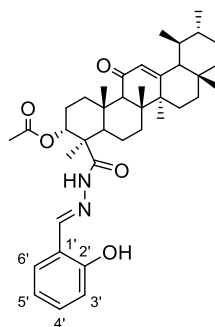

| Atom<br>C/H        | Parent compound             |                            | DEPT            | Hybrid compound                       |                            |
|--------------------|-----------------------------|----------------------------|-----------------|---------------------------------------|----------------------------|
|                    | <sup>1</sup> H(δ,ppm)(J,Hz) | <sup>13</sup> C<br>(δ,ppm) |                 | <sup>1</sup> H(δ,ppm)(J,Hz)           | <sup>13</sup> C(δ,<br>ppm) |
| 11                 | -                           | 199.6                      | C               | --                                    | 199.11                     |
| CHO/CH=N           | 10.2                        | 196.5                      | CH              | 8.41 (s, 1H)                          | 150.90                     |
| 24                 | -                           | 182.2                      | C               | -                                     | 165.00                     |
| CH <sub>3</sub> CO | -                           | 170.5                      | C               | -                                     | 172.89                     |
| 13                 | --                          | 165.3                      | C               | --                                    | 165.00                     |
| 2'                 | --                          | 162                        | CH              |                                       | 158.50                     |
| 4'                 | 6.69                        | 136.68                     | CH              | 6.92 (dd, <i>J</i> = 8.5, 4.1 Hz, 1H) | 131.84                     |
| 6'                 | 6.45                        | 133.69                     | CH              | 6.82 (t, <i>J</i> = 7.4 Hz, 1H)       | 130.86                     |
| 12                 | 5.54 s                      | 130.8                      | CH              | 5.49 (s, 1H)                          | 130.50                     |
| 1'                 | --                          | 120.926                    | C               | -                                     | 119.33                     |
| 5'                 | 6.7                         | 119.43                     | CH              | 7.13 (d, <i>J</i> = 7.5 Hz, 1H)       | 117.49                     |
| 3'                 | 6.9                         | 117.69                     | CH              | 7.23 (d, <i>J</i> = 7.6 Hz, 1H)       | 117.24                     |
| 3                  | 5.28 t                      | 73.6                       | CH              | 4.14 (s, 1H)                          | 70.32                      |
| 9                  | 2.39 s                      | 60.7                       | CH              | 2.50 – 2.29 (m, 1H)                   | 60.44                      |
| 18                 | 1.37 d ( <i>J</i> =12.3)    | 59.4                       | CH              | 1.28 – 1.11 (m, 1H)                   | 59.03                      |
| 5                  | 1.38 dd( <i>J</i> =12,2)    | 50.8                       | CH              | 1.38 – 1.29 (m, 1H)                   | 48.88                      |
| 4                  | -                           | 46.7                       | C               | -                                     | 47.51                      |
| 14                 | -                           | 45.3                       | C               | -                                     | 45.05                      |
| 8                  | -                           | 43.9                       | C               | -                                     | 43.86                      |
| 22                 | 1.29-1.46 m                 | 41.3                       | CH <sub>2</sub> | 1.38 – 1.29 (m, 2H)                   | 40.90                      |
| 19                 | 1.52 m                      | 39.7                       | CH              | 1.38 – 1.29 (m, 1H)                   | 39.32                      |
| 20                 | 1.39 m                      | 39.6                       | CH              | 1.38 – 1.29 (m, 1H)                   | 39.27                      |
| 10                 | -                           | 37.6                       | C               |                                       | 37.54                      |
| 1                  | 2.53dd( <i>J</i> =13.2,2)   | 35.0                       | CH <sub>2</sub> | 2.50 – 2.29 (m, 2H)                   | 34.18                      |
| 17                 | -                           | 34.2                       | C               | --                                    | 34.00                      |
| 15                 | 1.66 m                      | 33.2                       | CH <sub>2</sub> | 1.59 – 1.38 (m, 2H)                   | 34.00                      |
| 7                  | 1.43 m                      | 31.3                       | CH <sub>2</sub> | 1.59 – 1.38 (m, 2H)                   | 33.18                      |
| 30                 | 0.80 d<br>( <i>J</i> =7.4)  | 29.3                       | CH <sub>3</sub> | 0.77 – 0.69 (m, 3H)                   | 30.91                      |
| 21                 | 1.01dd( <i>J</i> =11.8, 3)  | 27.9                       | CH <sub>2</sub> | 0.98 – 0.85 (m, 2H)                   | 28.9                       |

|                    |                        |      |                 |                                        |       |
|--------------------|------------------------|------|-----------------|----------------------------------------|-------|
| 16                 | 1.88 m                 | 27.6 | CH <sub>2</sub> | 1.87 – 1.68 (m, 2H)                    | 27.49 |
| 23                 | 1.21 s                 | 24.3 | CH <sub>3</sub> | 1.28 – 1.11 (m, 3H)                    | 27.18 |
| 2                  | 1.56 -2.22 m           | 23.9 | CH <sub>2</sub> | 2.03 (td, <i>J</i> = 13.5, 4.5 Hz, 2H) | 26.55 |
| CH <sub>3</sub> CO | 2.07 s                 | 21.7 | CH <sub>3</sub> | 1.87 – 1.68 (m, 3H)                    | 24.58 |
| 28                 | 0.93 s                 | 21.5 | CH <sub>3</sub> | 0.98 – 0.85 (m, 3H)                    | 21.15 |
| 27                 | 1.33 s                 | 20.9 | CH <sub>3</sub> | 1.28 – 1.11 (m, 3H)                    | 20.51 |
| 6                  | 1.75 m                 | 19.2 | CH <sub>2</sub> | 1.59 – 1.38 (m, 2H)                    | 19.94 |
| 26                 | 1.17 s                 | 18.8 | CH <sub>3</sub> | 1.28 – 1.11 (m, 3H)                    | 18.38 |
| 29                 | 0.78 d( <i>J</i> =6.3) | 17.8 | CH <sub>3</sub> | 0.77 – 0.69 (m, 3H)                    | 17.45 |
| 25                 | 1.12 s                 | 13.6 | CH <sub>3</sub> | 1.08 (s, 3H)                           | 13.76 |
| NH                 | 11.25                  | --   | NH              | 8.56 (s, 1H)                           |       |
| OH                 | 9.1                    | --   | --              | --                                     | --    |

Table S19 NMR assignment of compound 16g

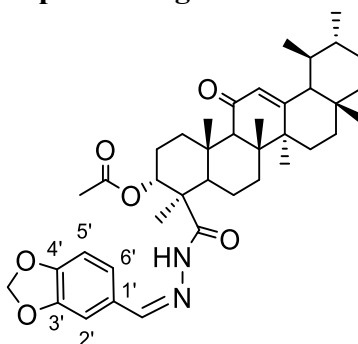

| Parent compound      |                                |                            | Hybrid compound |                                       |                            |
|----------------------|--------------------------------|----------------------------|-----------------|---------------------------------------|----------------------------|
| Atom<br>C/H          | <sup>1</sup> H(δ,ppm)(J,Hz)    | <sup>13</sup> C<br>(δ,ppm) | DEPT            | <sup>1</sup> H(δ,ppm)(J,Hz)           | <sup>13</sup> C(δ,<br>ppm) |
| NH                   | 11.25                          | --                         | NH              | 8.50 (s, 1H)                          |                            |
| CHO/CH=N             | 10.2                           | 190                        | CH              | 8.09 (s, 1H)                          | 147.62                     |
| 6'                   | 7.23                           | 108.3                      | CH              | 7.32 (d, <i>J</i> = 1.6 Hz, 1H)       | 108.16                     |
| 2'                   | 7.2                            | 106.9                      | CH              | 6.98 (dd, <i>J</i> = 8.0, 1.7 Hz, 1H) | 106.16                     |
| 5'                   | 6.92                           | 128.6                      | CH              | 6.72 (d, <i>J</i> = 8.0 Hz, 1H)       | 123.82                     |
| O-CH <sub>2</sub> -O | 6.06                           | 102.1                      | CH <sub>2</sub> | 5.92 (s, 2H)                          | 101.52                     |
| 12                   | 5.54 s                         | 130.8                      | CH              | 5.48 (s, 1H)                          | 128.25                     |
| 3                    | 5.28 t                         | 73.6                       | CH              | 4.15 (d, <i>J</i> = 2.9 Hz, 1H)       | 70.42                      |
| 1                    | 2.53<br>dd,( <i>J</i> =13.2,2) | 35.0                       | CH <sub>2</sub> | 2.49 – 2.32 (m, 2H)                   | 34.23                      |
| 9                    | 2.39 s                         | 60.7                       | CH              | 2.49 – 2.32 (m, 1H)                   | 60.45                      |
| CH <sub>3</sub> CO   | 2.07 s                         | 21.7                       | CH <sub>3</sub> | 1.86 – 1.68 (m, 3H)                   | 24.72                      |
| 16                   | 1.88 m                         | 27.6                       | CH <sub>2</sub> | 1.86 – 1.68 (m, 2H)                   | 27.50                      |
| 6                    | 1.75 m                         | 19.2                       | CH <sub>2</sub> | 1.57 – 1.37 (m, 2H)                   | 19.91                      |

|                    |                   |       |                 |                                            |        |
|--------------------|-------------------|-------|-----------------|--------------------------------------------|--------|
| 15                 | 1.66 m            | 33.2  | CH <sub>2</sub> | 1.57 – 1.37 (m, 2H)                        | 33.99  |
| 2                  | 1.56-2.22 m       | 23.9  | CH <sub>2</sub> | 2.09 – 1.96 (m, 1H)<br>1.86 – 1.68 (m, 1H) | 26.58  |
| 19                 | 1.52 m            | 39.7  | CH              | 1.35 – 1.28 (m, 1H)                        | 39.32  |
| 7                  | 1.43 m            | 31.3  | CH <sub>2</sub> | 1.57 – 1.37 (m, 2H)                        | 33.21  |
| 20                 | 1.39 m            | 39.6  | CH              | 1.35 – 1.28 (m, 1H)                        | 39.27  |
| 5                  | 1.38 dd,(J=12,2)  | 50.8  | CH              | 1.35 – 1.28 (m, 1H)                        | 48.91  |
| 18                 | 1.37 d( J=12.3)   | 59.4  | CH              | 1.35 – 1.28 (m, 1H)                        | 59.02  |
| 27                 | 1.33 s            | 20.9  | CH <sub>3</sub> | 1.27 – 1.15 (m, 3H)                        | 20.51  |
| 22                 | 1.29 -1.46 m      | 41.3  | CH <sub>2</sub> | 1.35 – 1.28 (m, 1H)<br>0.99 – 0.90 (m, 1H) | 40.91  |
| 23                 | 1.21 s            | 24.3  | CH <sub>3</sub> | 1.27 – 1.15 (m, 3H)                        | 27.17  |
| 26                 | 1.17 s            | 18.8  | CH <sub>3</sub> | 1.14 – 1.09 (m, 3H)                        | 18.36  |
| 25                 | 1.12 s            | 13.6  | CH <sub>3</sub> | 1.14 – 1.09 (m, 3H)                        | 13.79  |
| 21                 | 1.01dd(J=11.8, 3) | 27.9  | CH <sub>2</sub> | 0.90 – 0.85 (m, 2H)                        | 28.88  |
| 28                 | 0.93 s            | 21.5  | CH <sub>3</sub> | 0.90 – 0.85 (m, 3H)                        | 21.15  |
| 30                 | 0.80 d( J=7.4)    | 29.3  | CH <sub>3</sub> | 0.77 – 0.69 (m, 3H)                        | 30.91  |
| 29                 | 0.78 d( J=6.3)    | 17.8  | CH <sub>3</sub> | 0.77 – 0.69 (m, 3H)                        | 17.45  |
| 11                 | -                 | 199.6 | C               | --                                         | 199.15 |
| 24                 | -                 | 182.2 | C               | --                                         | 164.86 |
| CH <sub>3</sub> CO | -                 | 170.5 | C               | --                                         | 173.14 |
| 13                 | --                | 165.3 | C               | --                                         | 164.86 |
| 4'                 | --                | 153.1 | C               | --                                         | 149.75 |
| 3'                 | --                | 148.7 | C               | --                                         | 148.34 |
| 1'                 | --                | 131.9 | C               | -                                          | 130.54 |
| 4                  | -                 | 46.7  | C               | -                                          | 47.40  |
| 14                 | -                 | 45.3  | C               | -                                          | 45.05  |
| 8                  | -                 | 43.9  | C               | -                                          | 43.84  |
| 10                 | -                 | 37.6  | C               |                                            | 37.56  |
| 17                 | -                 | 34.2  | C               | --                                         | 33.99  |

Table S20 NMR assignment of compound 16h

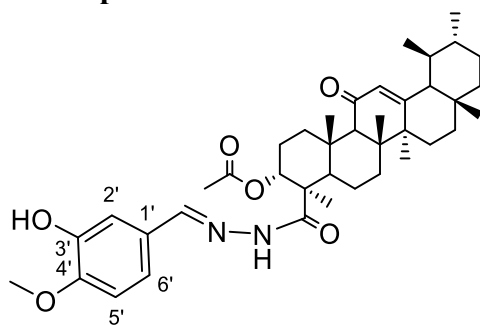

| Atom<br>C/H        | Parent compound             |                            |                 | Hybrid compound                            |                            |
|--------------------|-----------------------------|----------------------------|-----------------|--------------------------------------------|----------------------------|
|                    | <sup>1</sup> H(δ,ppm)(J,Hz) | <sup>13</sup> C<br>(δ,ppm) | DEPT            | <sup>1</sup> H(δ,ppm)(J,Hz)                | <sup>13</sup> C(δ,<br>ppm) |
| NH                 | 11.25                       | --                         | NH              | 8.87 (s, 1H)                               |                            |
| CHO/CH=N           | 10.2                        | 196.5                      | CH              | 8.00 (s, 1H)                               | 147.94                     |
| OH                 | 9.1                         | --                         | --              | --                                         | --                         |
| 2'                 | 7.44                        | 108.7                      | CH              | 7.28 (d, <i>J</i> = 2.0 Hz, 1H)            | 110.64                     |
| 6'                 | 7.41                        | 127.5                      | CH              | 7.02 (dd, <i>J</i> = 8.4, 2.0 Hz, 1H)      | 121.05                     |
| 5'                 | 6.9                         | 114.3                      | CH              | 6.71 (d, <i>J</i> = 8.4 Hz, 1H)            | 112.94                     |
| 12                 | 5.54 s                      | 130.8                      | CH              | 5.47 (s, 1H)                               | 130.47                     |
| 3                  | 5.28 t                      | 73.6                       | CH              | 4.19 (s, 1H)                               | 70.25                      |
| OCH3               | 3.96                        | 56.24                      | CH3             | 3.79 (s, 3H)                               | 55.91                      |
| 1                  | 2.53dd( <i>J</i> =13.2,2)   | 35.0                       | CH <sub>2</sub> | 2.49 – 2.29 (m, 2H)                        | 34.25                      |
| 9                  | 2.39 s                      | 60.7                       | CH              | 2.07 – 1.95 (m, 1H)                        | 60.47                      |
| CH <sub>3</sub> CO | 2.07 s                      | 21.7                       | CH <sub>3</sub> | 2.49 – 2.29 (m, 3H)                        | 24.65                      |
| 16                 | 1.88 m                      | 27.6                       | CH <sub>2</sub> | 1.58 – 1.31 (m, 2H)                        | 27.50                      |
| 6                  | 1.75 m                      | 19.2                       | CH <sub>2</sub> | 1.58 – 1.31 (m, 2H)                        | 19.79                      |
| 15                 | 1.66 m                      | 33.2                       | CH <sub>2</sub> | 1.58 – 1.31 (m, 2H)                        | 33.99                      |
| 2                  | 1.56 -2.22 m                | 23.9                       | CH <sub>2</sub> | 1.74 – 1.61 (m, 1H)<br>1.58 – 1.31 (m, 2H) | 26.56                      |
| 19                 | 1.52 m                      | 39.7                       | CH              | 1.31 – 1.27 (m, 1H)                        | 39.30                      |
| 7                  | 1.43 m                      | 31.3                       | CH <sub>2</sub> | 1.58 – 1.31 (m, 2H)                        | 33.17                      |
| 20                 | 1.39 m                      | 39.6                       | CH              | 1.31 – 1.27 (m, 1H)                        | 39.27                      |
| 5                  | 1.38 dd( <i>J</i> =12,2)    | 50.8                       | CH              | 1.31 – 1.27 (m, 1H)                        | 49.03                      |
| 18                 | 1.37 d( <i>J</i> =12.3)     | 59.4                       | CH              | 1.31 – 1.27 (m, 1H)                        | 59.03                      |
| 27                 | 1.33 s                      | 20.9                       | CH <sub>3</sub> | 1.26 – 1.12 (m, 3H)                        | 20.50                      |
| 22                 | 1.29 m<br>1.46 m            | 41.3                       | CH <sub>2</sub> | 1.26 – 1.12 (m, 1H)<br>1.12 – 1.07 (m, 1H) | 40.91                      |
| 23                 | 1.21 s                      | 24.3                       | CH <sub>3</sub> | 1.26 – 1.12 (m, 3H)                        | 27.17                      |
| 26                 | 1.17 s                      | 18.8                       | CH <sub>3</sub> | 1.12 – 1.07 (m, 3H)                        | 18.35                      |
| 25                 | 1.12 s                      | 13.6                       | CH <sub>3</sub> | 1.12 – 1.07 (m, 3H)                        | 13.92                      |
| 21                 | 1.01dd( <i>J</i> =11.8, 3)  | 27.9                       | CH <sub>2</sub> | 0.89 – 0.85 (m, 2H)                        | 28.88                      |

|                    |                |       |                 |                                       |        |
|--------------------|----------------|-------|-----------------|---------------------------------------|--------|
| 28                 | 0.93 s         | 21.5  | CH <sub>3</sub> | 0.89 – 0.85 (m, 3H)                   | 21.15  |
| 30                 | 0.80 d (J=7.4) | 29.3  | CH <sub>3</sub> | 0.75 – 0.65 (m, 3H)                   | 30.91  |
| 29                 | 0.78 d (J=6.3) | 17.8  | CH <sub>3</sub> | 0.75 – 0.65 (m, 3H)                   | 17.45  |
| 11                 | -              | 199.6 | C               | --                                    | 199.46 |
| 24                 | -              | 182.2 | C               | -                                     | 165.14 |
| CH <sub>3</sub> CO | -              | 170.5 | C               | -                                     | 173.53 |
| 13                 | --             | 165.3 | C               | --                                    | 165.14 |
| 4'                 | --             | 151.6 | CH              | 6.92 (dd, <i>J</i> = 8.5, 4.1 Hz, 1H) | 149.14 |
| 3'                 | -              | 147.1 | CH              | 7.23 (d, <i>J</i> = 7.6 Hz, 1H)       | 146.09 |
| 1'                 | --             | 129.8 |                 | -                                     | 127.00 |
| 4                  | -              | 46.7  | C               | -                                     | 47.44  |
| 14                 | -              | 45.3  | C               | -                                     | 45.08  |
| 8                  | -              | 43.9  | C               | -                                     | 43.84  |
| 10                 | -              | 37.6  | C               |                                       | 37.54  |
| 17                 | -              | 34.2  | C               | --                                    | 33.99  |



Table S21 NMR assignment of compound 16i

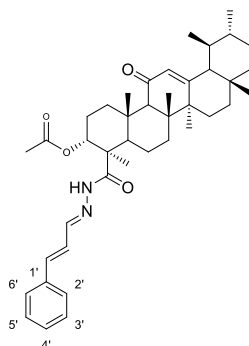

| Atom<br>C/H        | Parent compound             |                            | Hybrid compound |                                        |                         |
|--------------------|-----------------------------|----------------------------|-----------------|----------------------------------------|-------------------------|
|                    | <sup>1</sup> H(δ,ppm)(J,Hz) | <sup>13</sup> C<br>(δ,ppm) | DEPT            | <sup>1</sup> H(δ,ppm)(J,Hz)            | <sup>13</sup> C(δ, ppm) |
| 11                 | -                           | 199.6                      | C               | --                                     | 199.46                  |
| CHO/CH=N           | 10.2                        | 193.36                     | CH              | 7.96 (d, <i>J</i> = 8.8 Hz, 1H)        | 149.36                  |
| 24                 | -                           | 182.2                      | C               | -                                      | 164.87                  |
| CH <sub>3</sub> CO | -                           | 170.5                      | C               | -                                      | 173.19                  |
| 13                 | --                          | 165.3                      | C               | --                                     | 164.87                  |
| Ph-CH              | 7.48                        | 152.46                     |                 | 6.99 (dd, <i>J</i> = 16.1, 8.7 Hz, 1H) | 152.94                  |
| 1'                 | --                          | 134.12                     |                 | -                                      | 135.68                  |
| CH=CH              | 6.6                         | 131.17                     |                 | 6.84 (d, <i>J</i> = 15.9 Hz, 1H)       | 131.34                  |
| 12                 | 5.54 s                      | 130.8                      | CH              | 5.49 (s, 1H)                           | 130.54                  |
| 5'                 | 6.6                         | 129.07                     | CH              | 7.29 (t, <i>J</i> = 7.0 Hz, 1H)        | 129.30                  |
| 3'                 | 6.6                         | 129.07                     | CH              | 7.29 (t, <i>J</i> = 7.0 Hz, 2H)        | 129.15                  |
| 4'                 | 6.6                         | 128.62                     | CH              | 7.28 – 7.20 (m, 1H)                    | 128.92                  |
| 2'                 | 7.64-7.33                   | 128.46                     | CH              | 7.47 – 7.34 (m, 1H)                    | 128.54                  |
| 6'                 | 7.64-7.33                   | 127.5                      | CH              | 7.47 – 7.34 (m, 1H)                    | 127.23                  |
| 3                  | 5.28 t                      | 73.6                       | CH              | 4.17 (s, 1H)                           | 70.36                   |
| 9                  | 2.39 s                      | 60.7                       | CH              | 2.50 – 2.32 (m, 1H)                    | 60.45                   |
| 18                 | 1.37 d( <i>J</i> =12.3)     | 59.4                       | CH              | 1.20 – 1.05 (m, 1H)                    | 59.02                   |
| 5                  | 1.38 dd( <i>J</i> =12,2)    | 50.8                       | CH              | 1.34 – 1.20 (m, 1H)                    | 48.89                   |
| 4                  | -                           | 46.7                       | C               | -                                      | 47.34                   |
| 14                 | -                           | 45.3                       | C               | -                                      | 45.04                   |
| 8                  | -                           | 43.9                       | C               | -                                      | 43.84                   |
| 22                 | 1.29 -1.46 m                | 41.3                       | CH <sub>2</sub> | 1.34 – 1.20 (m, 2H)                    | 40.91                   |
| 19                 | 1.52 m                      | 39.7                       | CH              | 1.58 – 1.35 (m, 1H)                    | 39.33                   |
| 20                 | 1.39 m                      | 39.6                       | CH              | 1.34 – 1.20 (m, 1H)                    | 39.28                   |
| 10                 | -                           | 37.6                       | C               |                                        | 37.55                   |
| 1                  | 2.53dd( <i>J</i> =13.2,2)   | 35.0                       | CH <sub>2</sub> | 2.50 – 2.32 (m, 2H)                    | 34.18                   |
| 17                 | -                           | 34.2                       | C               | --                                     | 33.99                   |
| 15                 | 1.66 m                      | 33.2                       | CH <sub>2</sub> | 1.58 – 1.35 (m, 2H)                    | 33.99                   |

|                    |                   |      |                 |                                            |       |
|--------------------|-------------------|------|-----------------|--------------------------------------------|-------|
| 7                  | 1.43 m            | 31.3 | CH <sub>2</sub> | 1.58 – 1.35 (m, 2H)                        | 33.20 |
| 30                 | 0.80 d(J=7.4)     | 29.3 | CH <sub>3</sub> | 0.77 – 0.69 (m, 3H)                        | 30.91 |
| 21                 | 1.01dd(J=11.8, 3) | 27.9 | CH <sub>2</sub> | 0.90 – 0.85 (m, 2H)                        | 28.88 |
| 16                 | 1.88 m            | 27.6 | CH <sub>2</sub> | 1.87 – 1.64 (m, 2H)                        | 27.50 |
| 23                 | 1.21 s            | 24.3 | CH <sub>3</sub> | 1.34 – 1.20 (m, 3H)                        | 27.17 |
| 2                  | 1.56 -2.22 m      | 23.9 | CH <sub>2</sub> | 2.50 – 2.32 (m, 1H)<br>1.87 – 1.64 (m, 1H) | 26.58 |
| CH <sub>3</sub> CO | 2.07 s            | 21.7 | CH <sub>3</sub> | 2.09 – 1.96 (m, 3H)                        | 24.54 |
| 28                 | 0.93 s            | 21.5 | CH <sub>3</sub> | 0.90 – 0.85 (m, 3H)                        | 21.15 |
| 27                 | 1.33 s            | 20.9 | CH <sub>3</sub> | 1.34 – 1.20 (m, 3H)                        | 20.51 |
| 6                  | 1.75 m            | 19.2 | CH <sub>2</sub> | 1.87 – 1.64 (m, 2H)                        | 19.90 |
| 26                 | 1.17 s            | 18.8 | CH <sub>3</sub> | 1.20 – 1.05 (m, 3H)                        | 18.38 |
| 29                 | 0.78 d(J=6.3)     | 17.8 | CH <sub>3</sub> | 0.77 – 0.69 (m, 3H)                        | 17.45 |
| 25                 | 1.12 s            | 13.6 | CH <sub>3</sub> | 1.20 – 1.05 (m, 3H)                        | 13.72 |
| NH                 | 11.25             | --   | NH              | 8.69 (s, 1H)                               |       |
| OH                 | 9.1               | --   | --              | --                                         | --    |

**Table S22 NMR assignment of compound 16j**

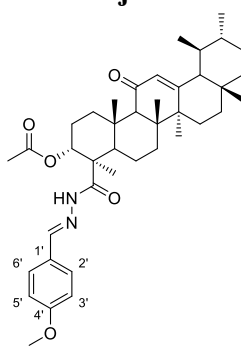

| Atom<br>C/H | Parent compound             |                            | Hybrid compound |                             |                            |
|-------------|-----------------------------|----------------------------|-----------------|-----------------------------|----------------------------|
|             | <sup>1</sup> H(δ,ppm)(J,Hz) | <sup>13</sup> C<br>(δ,ppm) | DEPT            | <sup>1</sup> H(δ,ppm)(J,Hz) | <sup>13</sup> C<br>(δ,ppm) |
| NH          | 11.25                       | --                         | NH              | 8.47 (s, 1H)                | --                         |
| CHO/CH=N    | 10.2                        | 190.7                      | CH              | 8.11 (s, 1H)                | 147.75                     |

|                    |                       |        |                 |                                            |        |
|--------------------|-----------------------|--------|-----------------|--------------------------------------------|--------|
| 2'                 | 7.8                   | 131.93 | CH              | 7.61 (d, $J = 8.3$ Hz, 1H)                 | 132.04 |
| 6'                 | 7.8                   | 131.93 | CH              | 7.61 (d, $J = 8.3$ Hz, 1H)                 | 130.56 |
| 5'                 | 6.98                  | 114.33 | CH              | 6.83 (d, $J = 8.3$ Hz, 1H)                 | 114.34 |
| 3'                 | 6.98                  | 114.33 | CH              | 6.83 (d, $J = 8.3$ Hz, 1H)                 | 114.17 |
| 12                 | 5.54 s                | 130.8  | CH              | 5.48 (s, 1H)                               | 129.28 |
| 3                  | 5.28 t                | 73.6   | CH              | 4.17 (s, 1H)                               | 70.48  |
| OCH <sub>3</sub>   | 3.85                  | 56     | CH <sub>3</sub> | 3.76 (s, 3H)                               | 55.39  |
| 1                  | 2.53dd,( $J=13.2,2$ ) | 35.0   | CH <sub>2</sub> | 2.51 – 2.34 (m, 2H)                        | 34.23  |
| 9                  | 2.39 s                | 60.7   | CH              | 2.51 – 2.34 (m, 1H)                        | 60.45  |
| CH <sub>3</sub> CO | 2.07 s                | 21.7   | CH <sub>3</sub> | 1.88 – 1.69 (m, 3H)                        | 24.75  |
| 16                 | 1.88 m                | 27.6   | CH <sub>2</sub> | 2.02 (ddd, $J = 16.9, 11.0, 4.2$ Hz, 2H)   | 27.51  |
| 6                  | 1.75 m                | 19.2   | CH <sub>2</sub> | 1.88 – 1.69 (m, 2H)                        | 19.94  |
| 15                 | 1.66 m                | 33.2   | CH <sub>2</sub> | 1.56 – 1.42 (m, 2H)                        | 33.99  |
| 2                  | 1.56-2.22 m           | 23.9   | CH <sub>2</sub> | 1.88 – 1.69 (m, 1H)<br>1.56 – 1.42 (m, 1H) | 26.59  |
| 19                 | 1.52 m                | 39.7   | CH              | 1.32 – 1.28 (m, 1H)                        | 39.3   |
| 7                  | 1.43 m                | 31.3   | CH <sub>2</sub> | 1.56 – 1.42 (m, 2H)                        | 33.22  |
| 20                 | 1.39 m                | 39.6   | CH              | 1.32 – 1.28 (m, 1H)                        | 39.28  |
| 5                  | 1.38 dd,( $J=12,2$ )  | 50.8   | CH              | 1.32 – 1.28 (m, 1H)                        | 48.91  |
| 18                 | 1.37 d( $J=12.3$ )    | 59.4   | CH              | 1.32 – 1.28 (m, 1H)                        | 59.02  |
| 27                 | 1.33 s                | 20.9   | CH <sub>3</sub> | 1.28 – 1.24 (m, 3H)                        | 20.52  |
| 22                 | 1.29 -1.46 m          | 41.3   | CH <sub>2</sub> | 1.28 – 1.24 (m, 1H)<br>0.98 – 0.92 (m, 1H) | 40.91  |
| 23                 | 1.21 s                | 24.3   | CH <sub>3</sub> | 1.24 – 1.15 (m, 3H)                        | 27.18  |
| 26                 | 1.17 s                | 18.8   | CH <sub>3</sub> | 1.14 – 1.09 (m, 3H)                        | 18.37  |
| 25                 | 1.12 s                | 13.6   | CH <sub>3</sub> | 1.14 – 1.09 (m, 3H)                        | 13.78  |
| 21                 | 1.01dd( $J=11.8, 3$ ) | 27.9   | CH <sub>2</sub> | 0.90 – 0.83 (m, 2H)                        | 28.89  |
| 28                 | 0.93 s                | 21.5   | CH <sub>3</sub> | 0.90 – 0.83 (m, 3H)                        | 21.15  |
| 30                 | 0.80 d( $J=7.4$ )     | 29.3   | CH <sub>3</sub> | 0.77 – 0.69 (m, 3H)                        | 30.92  |
| 29                 | 0.78 d( $J=6.3$ )     | 17.8   | CH <sub>3</sub> | 0.77 – 0.69 (m, 3H)                        | 17.45  |
| 11                 | -                     | 199.6  | C               | --                                         | 199.13 |
| 24                 | -                     | 182.2  | C               | -                                          | 164.82 |
| CH <sub>3</sub> CO | -                     | 170.5  | C               | -                                          | 173.33 |
| 13                 | -                     | 165.3  | C               | -                                          | 164.79 |
| 4'                 | --                    | 164.6  | CH              | 7.33 – 7.27 (m, 1H)                        | 161.50 |
| 1'                 | --                    | 129.97 | C               | --                                         | 126.27 |
| 4                  | -                     | 46.7   | C               | -                                          | 47.35  |
| 14                 | -                     | 45.3   | C               | -                                          | 45.05  |
| 8                  | -                     | 43.9   | C               | -                                          | 43.84  |
| 10                 | -                     | 37.6   | C               | -                                          | 37.58  |
| 17                 | -                     | 34.2   | C               | -                                          | 33.99  |

Table S23 NMR assignment of compound 18

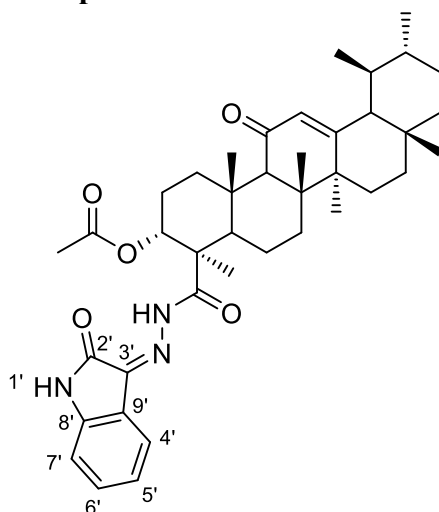

| Atom<br>C/H        | Parent compound             |                            | Hybrid compound |                                            |                            |
|--------------------|-----------------------------|----------------------------|-----------------|--------------------------------------------|----------------------------|
|                    | <sup>1</sup> H(δ,ppm)(J,Hz) | <sup>13</sup> C<br>(δ,ppm) | DEPT            | <sup>1</sup> H(δ,ppm)(J,Hz)                | <sup>13</sup> C<br>(δ,ppm) |
| 11                 | -                           | 199.6                      | C               | --                                         | 199.28                     |
| C=O/C=N            | --                          | 184.3                      | C               | --                                         | 140.31                     |
| 24                 | -                           | 182.2                      | C               | --                                         | 164.96                     |
| CH <sub>3</sub> CO | -                           | 170.5                      | C               | --                                         | 174.58                     |
| 13                 | -                           | 165.3                      | C               | --                                         | 164.96                     |
| 2'                 | --                          | 159.26                     | C               | --                                         | 162.56                     |
| 8'                 | --                          | 150.64                     | C               | --                                         | 131.41                     |
| 12                 | 5.54 s                      | 130.8                      | CH              | 5.57 (s, 1H)                               | 130.54                     |
| 4'                 | 7.50                        | 124.59                     | CH              | 7.35 (t, <i>J</i> = 7.7 Hz, 1H)            | 123.63                     |
| 5'                 | 7.07                        | 122.68                     | CH              | 7.13 (t, <i>J</i> = 7.6 Hz, 1H)            | 122.29                     |
| 6'                 | 7.58                        | 117.73                     | CH              | 7.82 (d, <i>J</i> = 7.6 Hz, 1H)            | 120.57                     |
| 9'                 | --                          | 117.73                     | C               |                                            | 120.57                     |
| 7'                 | 6.9                         | 112.12                     | CH              | 6.91 (d, <i>J</i> = 7.8 Hz, 1H)            | 110.61                     |
| 3                  | 5.28 t                      | 73.6                       | CH              | 4.29 (s, 1H)                               | 70.51                      |
| 9                  | 2.39 s                      | 60.7                       | CH              | 2.62 – 2.46 (m, 1H)                        | 60.47                      |
| 18                 | 1.37 d( <i>J</i> =12.3)     | 59.4                       | CH              | 1.70 – 1.53 (m, 1H)                        | 59.03                      |
| 5                  | 1.38 dd, <i>(J</i> =12,2)   | 50.8                       | CH              | 1.70 – 1.53 (m, 1H)                        | 48.86                      |
| 4                  | -                           | 46.7                       | C               | -                                          | 48.18                      |
| 14                 | -                           | 45.3                       | C               | -                                          | 45.06                      |
| 8                  | -                           | 43.9                       | C               | -                                          | 43.83                      |
| 22                 | 1.29 m<br>1.46 m            | 41.3                       | CH <sub>2</sub> | 1.37 – 1.24 (m, 1H)<br>1.51 – 1.36 (m, 1H) | 40.93                      |
| 19                 | 1.52 m                      | 39.7                       | CH              | 1.70 – 1.53 (m, 1H)                        | 39.29                      |
| 20                 | 1.39 m                      | 39.6                       | CH              | 1.70 – 1.53 (m, 1H)                        | 39.29                      |
| 10                 | -                           | 37.6                       | C               | -                                          | 37.59                      |
| 1                  | 2.53dd, <i>(J</i> =13.2,2)  | 35.0                       | CH <sub>2</sub> | 2.62 – 2.46 (m, 2H)                        | 34.11                      |

|                    |                     |      |                 |                                                            |       |
|--------------------|---------------------|------|-----------------|------------------------------------------------------------|-------|
| 17                 | -                   | 34.2 | C               | -                                                          | 33.99 |
| 15                 | 1.66 m              | 33.2 | CH <sub>2</sub> | 1.70 – 1.53 (m, 2H)                                        | 33.99 |
| 7                  | 1.43 m              | 31.3 | CH <sub>2</sub> | 1.70 – 1.53 (m, 2H)                                        | 30.92 |
| 30                 | 0.80 d (J=7.4)      | 29.3 | CH <sub>3</sub> | 0.90 – 0.77 (m, 3H)                                        | 30.92 |
| 21                 | 1.01 dd (J=11.8, 3) | 27.9 | CH <sub>2</sub> | 1.07 – 0.94 (m, 2H)                                        | 28.87 |
| 16                 | 1.88 m              | 27.6 | CH <sub>2</sub> | 1.99 – 1.74 (m, 2H)                                        | 27.53 |
| 23                 | 1.21 s              | 24.3 | CH <sub>3</sub> | 1.37 – 1.24 (m, 3H)                                        | 27.13 |
| 2                  | 1.56-2.22 m         | 23.9 | CH <sub>2</sub> | 2.11 (td, <i>J</i> = 13.7, 4.8 Hz, 1H) 1.70 – 1.53 (m, 1H) | 26.58 |
| CH <sub>3</sub> CO | 2.07 s              | 21.7 | CH <sub>3</sub> | 1.70 – 1.53 (m, 3H)                                        | 24.56 |
| 28                 | 0.93 s              | 21.5 | CH <sub>3</sub> | 1.07 – 0.94 (m, 3H)                                        | 21.15 |
| 27                 | 1.33 s              | 20.9 | CH <sub>3</sub> | 1.51 – 1.36 (m, 3H)                                        | 20.53 |
| 6                  | 1.75 m              | 19.2 | CH <sub>2</sub> | 1.70 – 1.53 (m, 2H)                                        | 19.43 |
| 26                 | 1.17 s              | 18.8 | CH <sub>3</sub> | 1.25 – 1.14 (m, 3H)                                        | 18.27 |
| 29                 | 0.78 d (J=6.3)      | 17.8 | CH <sub>3</sub> | 0.90 – 0.77 (m, 3H)                                        | 17.46 |
| 25                 | 1.12 s              | 13.6 | CH <sub>3</sub> | 1.25 – 1.14 (m, 3H)                                        | 13.79 |
| NH ISATIN          | 11.023              | --   | --              | 13.15 (s, 1H)                                              |       |
| NH-HYDRAZIDE       | 11                  |      | --              | 7.80 (s, 1H)                                               |       |

**Table S24. Gene distribution and correlation to KEGG enrichment and different biological process (BP), molecular functions(MF)**

| ID | Gene symbol | number of related KEGG | Numbers related BP | Numbers related MF |
|----|-------------|------------------------|--------------------|--------------------|
| 19 | PIK3R1      | 46/56                  | 61/445             | 24/103             |
| 1  | GRB2        | 36/56                  | 28/445             | 17/103             |
| 5  | EGFR        | 35/56                  | 70/445             | 22/103             |
| 16 | MET         | 17/56                  | 56/445             | 7/103              |
| 24 | STAT1       | 12/56                  | 46/445             | 14/103             |
| 13 | CYP2C9      | 8/56                   | 30/445             | 14/103             |
| 9  | GSTM1       | 7/56                   | 22/445             | 2/103              |
| 17 | CYP2C8      | 7/56                   | 25/445             | 15/103             |
| 15 | HMOX1       | 6/56                   | 93/445             | 9/103              |
| 20 | CCL5        | 6/56                   | 68/445             | 18/103             |
| 18 | EPHA2       | 5/56                   | 79/445             | 9/103              |
| 10 | CCNA2       | 3/56                   | 22/445             | 2/103              |
| 2  | RARB        | 2/56                   | 7/445              | 2/103              |
| 21 | HSD11B1     | 2/56                   | 1/445              | 1/103              |
| 26 | AR          | 2/56                   | 57/445             | 11/103             |
| 3  | TPH1        | 1/56                   | 14/445             | 4/103              |
| 22 | ALAD        | 1/56                   | 35/445             | 0/103              |
| 4  | SERPINA1    | 0/56                   | 3/445              | 0/103              |
| 6  | NR1H4       | 0/56                   | 71/445             | 12/103             |
| 7  | PARP1       | 0/56                   | 81/445             | 7/103              |
| 8  | HPRT1       | 0/56                   | 29/445             | 1/103              |
| 11 | ALB         | 0/56                   | 7/445              | 6/103              |
| 12 | SEC14L2     | 0/56                   | 13/445             | 2/103              |
| 14 | GPI         | 0/56                   | 41/445             | 3/103              |
| 23 | NR3C1       | 0/56                   | 33/445             | 7/103              |
| 25 | LGALS3      | 0/56                   | 50/445             | 8/103              |

**TableS25. Primer design and sequence for qPCR analysis**

| Gene          | Primer sequence               | Description |
|---------------|-------------------------------|-------------|
| TNF- $\alpha$ | 5'TGGAAGCTGGCAGAAGAGGGCACT 3' | Forward     |
|               | 5'AGAGGCTGAGACATAGGCACCG 3'   | Reverse     |
| GAPDH         | 5'-ACTCCACTCACGGCAAATTC-3'    | Forward     |
|               | R- 5'-GTCATGAGCCCTTCCACAAT-3' | Reverse     |

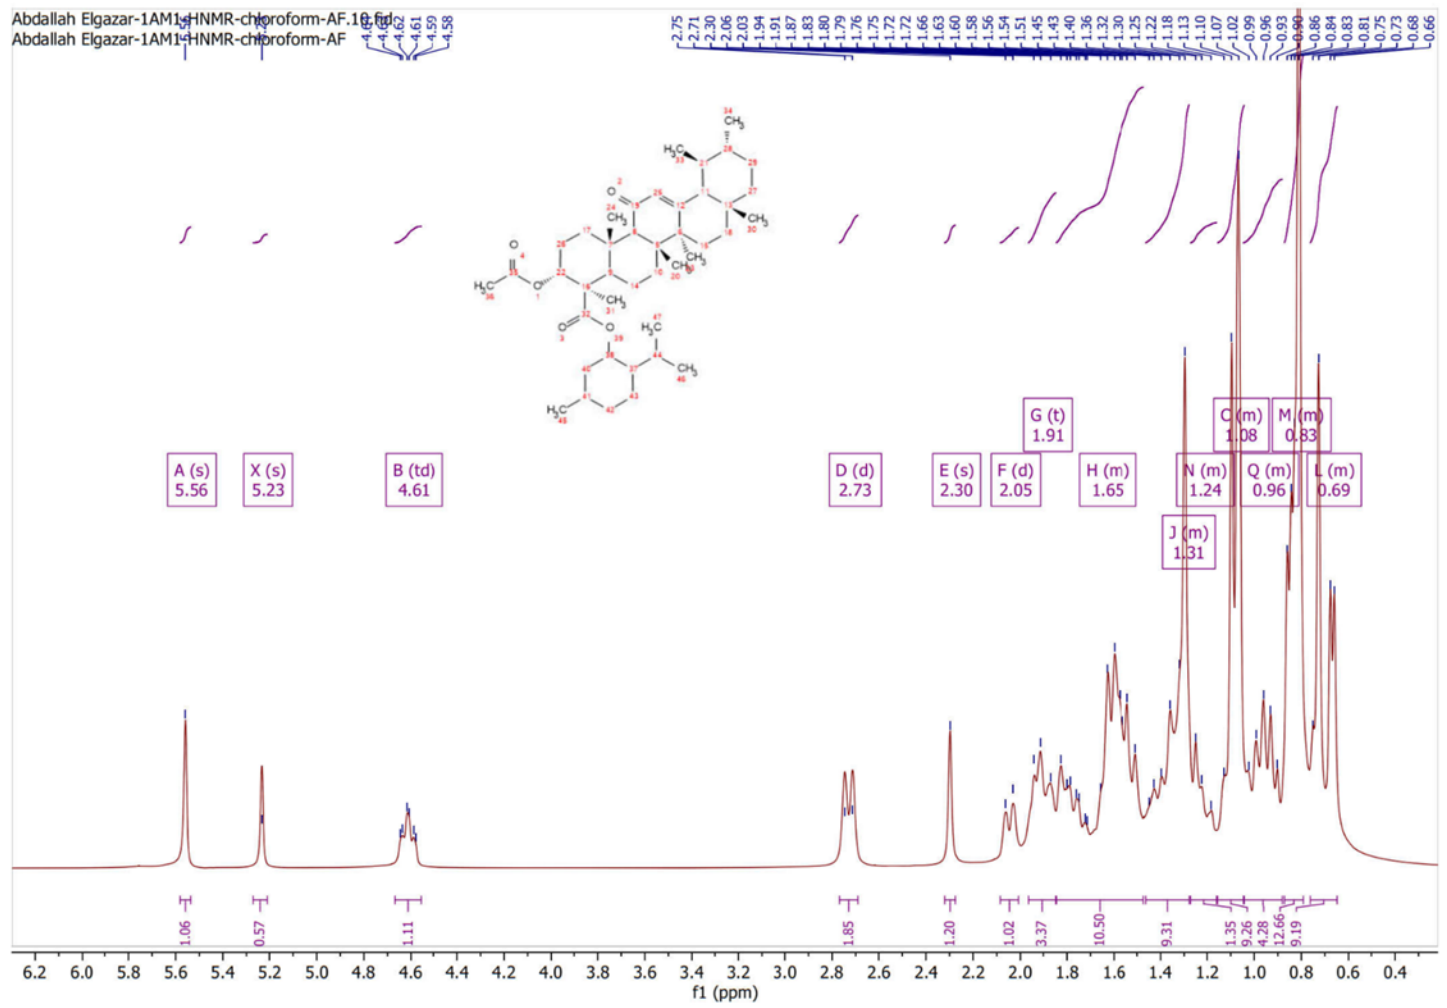

Figure S1. <sup>1</sup>H N.M.R spectrum of compound 3a

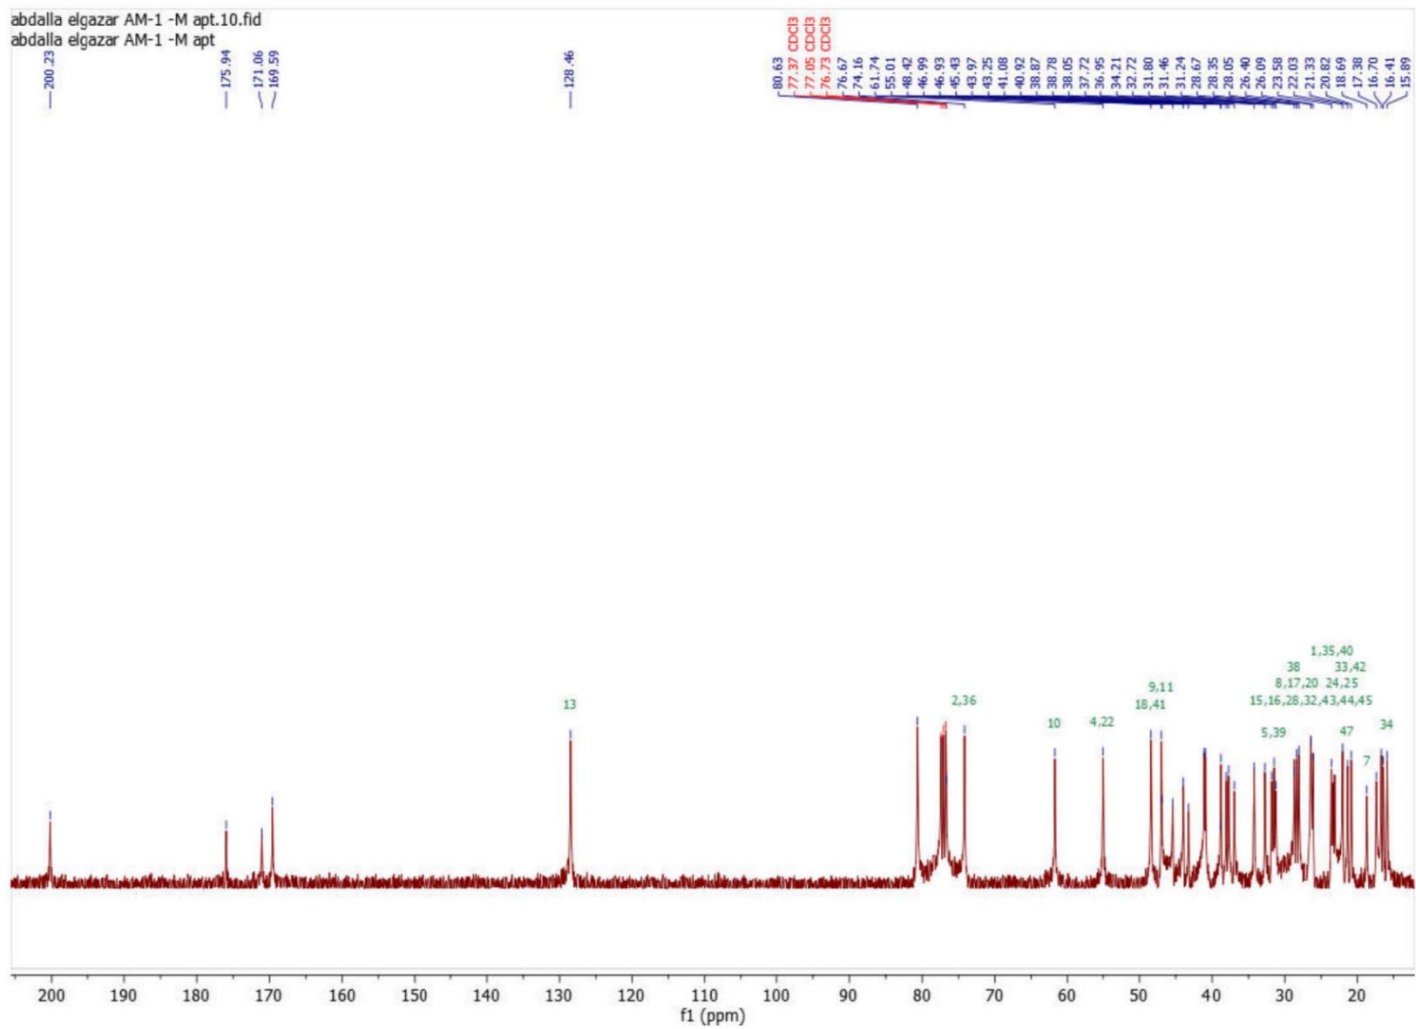

Figure S2. <sup>13</sup>C N.M.R spectrum of compound 3a





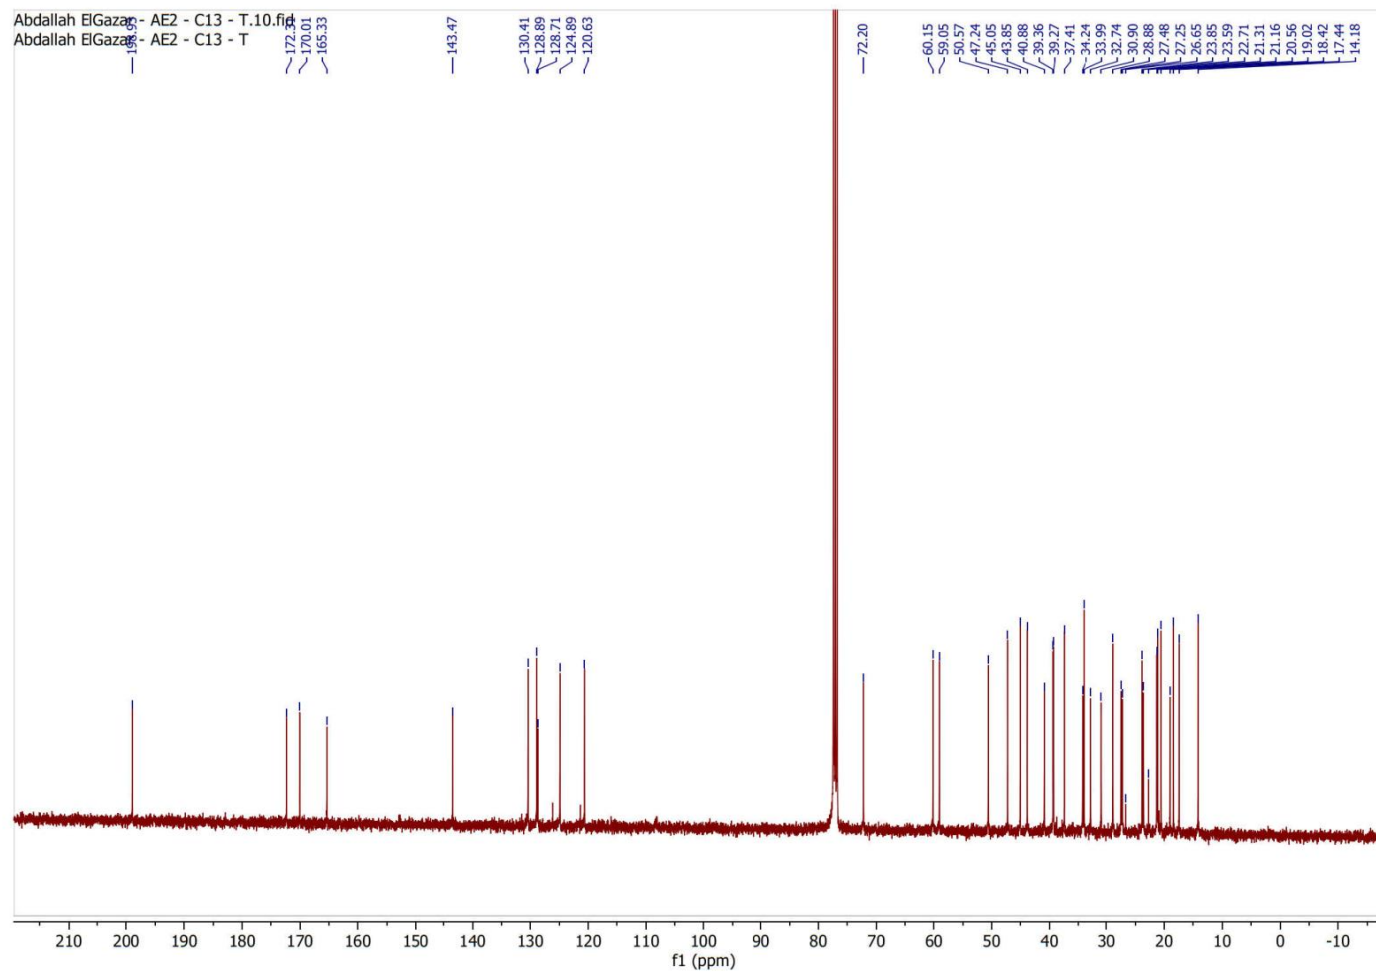

Figure S4.  $^{13}\text{C}$  N.M.R spectrum of compound 3b

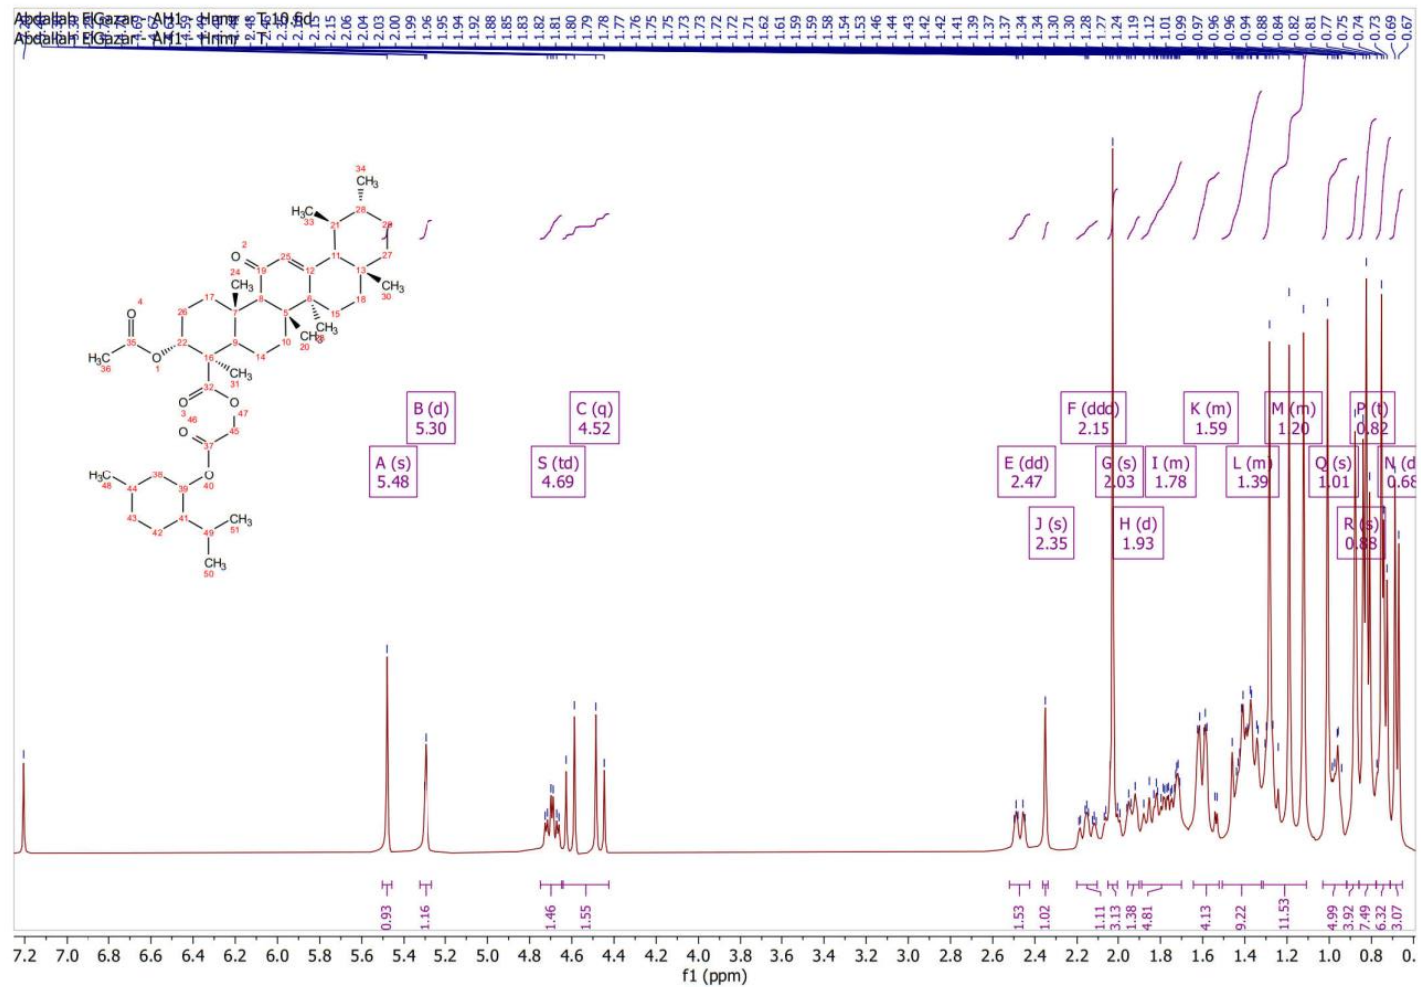

Figure S5 <sup>1</sup>H N.M.R spectrum of compound 5a

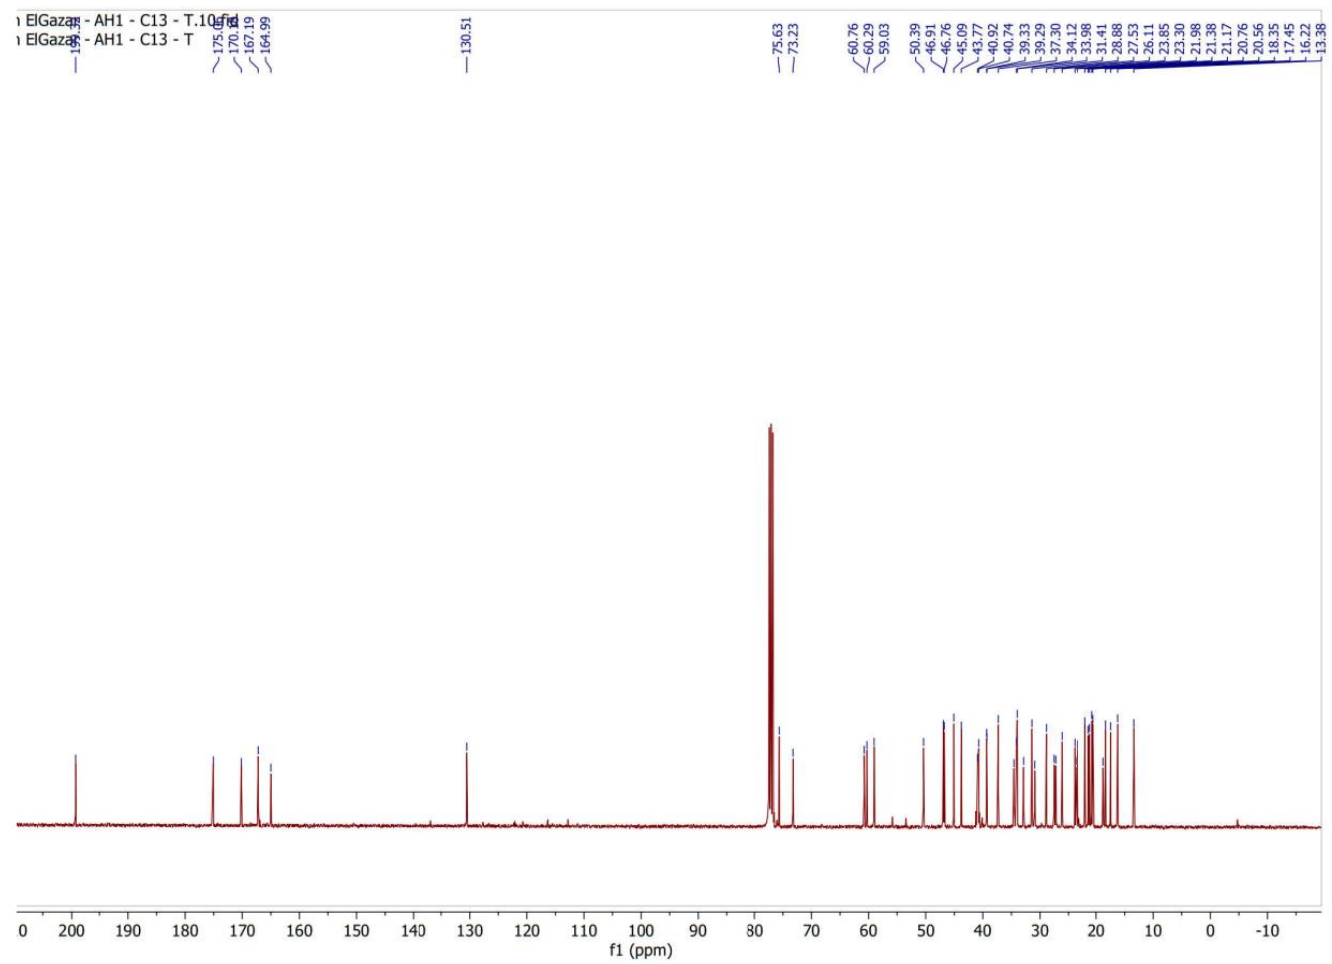

Figure S6.  $^{13}\text{C}$  N.M.R spectrum of compound 5a

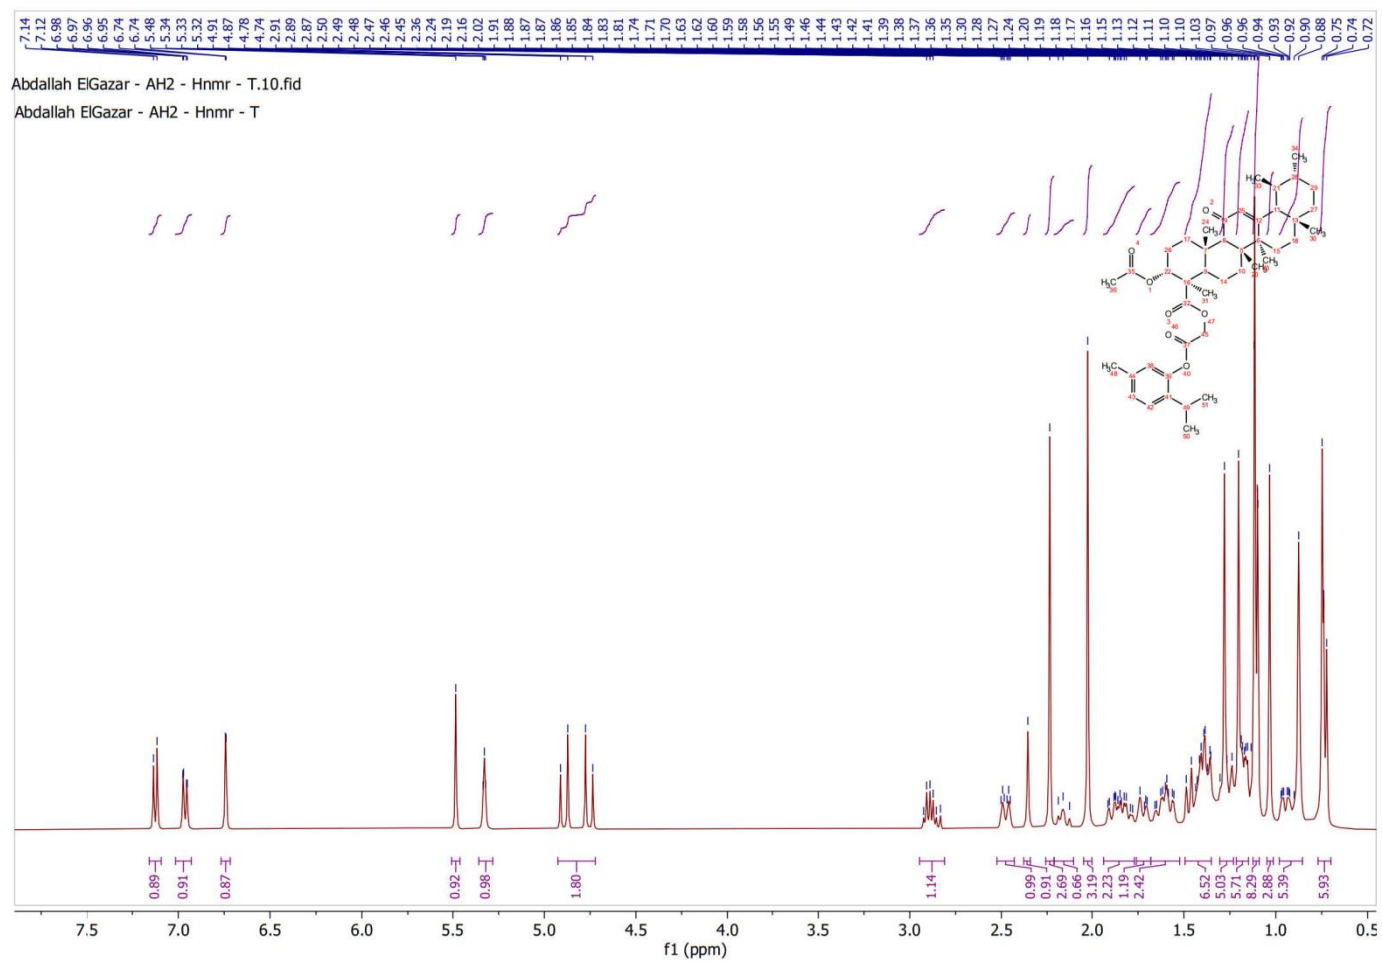

Figure S7. <sup>1</sup>H N.M.R spectrum of compound 5b

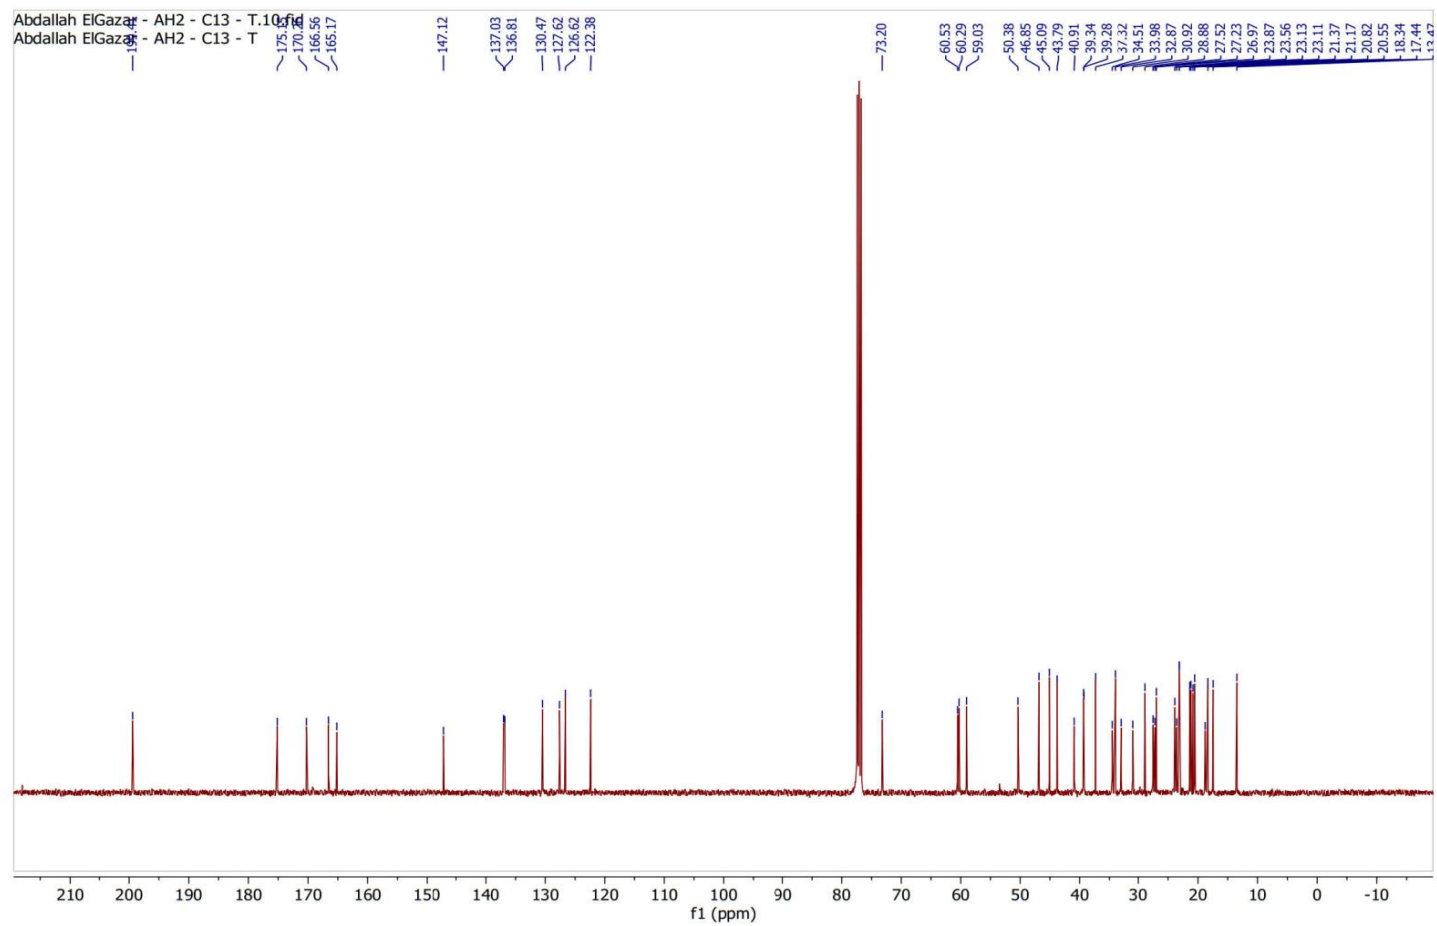

Figure S8.  $^{13}\text{C}$  N.M.R spectrum of compound **5b**

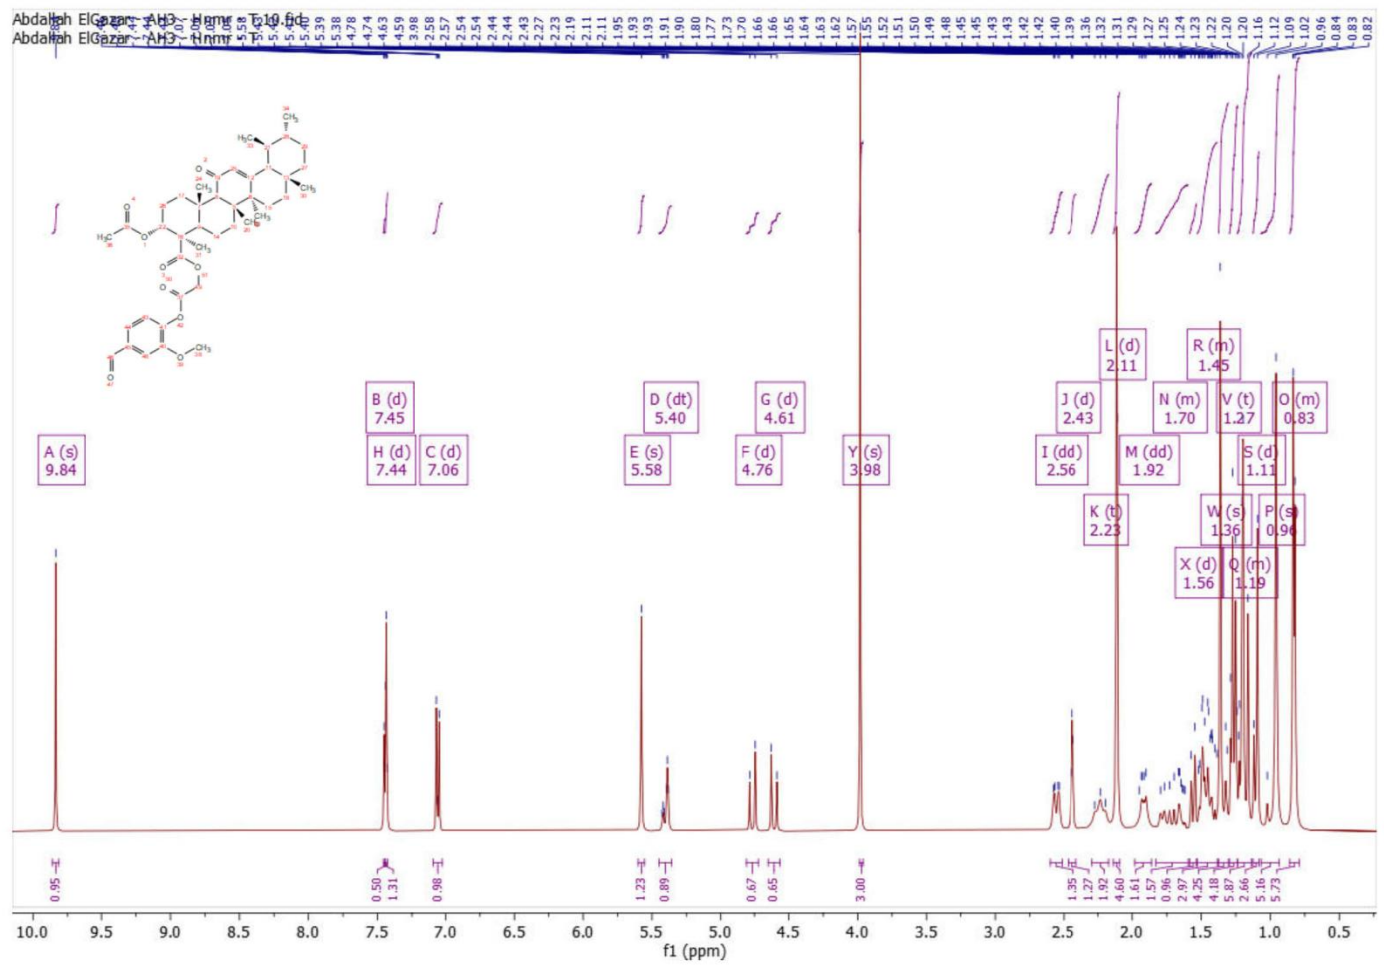

Figure S9. <sup>1</sup>H N.M.R spectrum of compound 5c

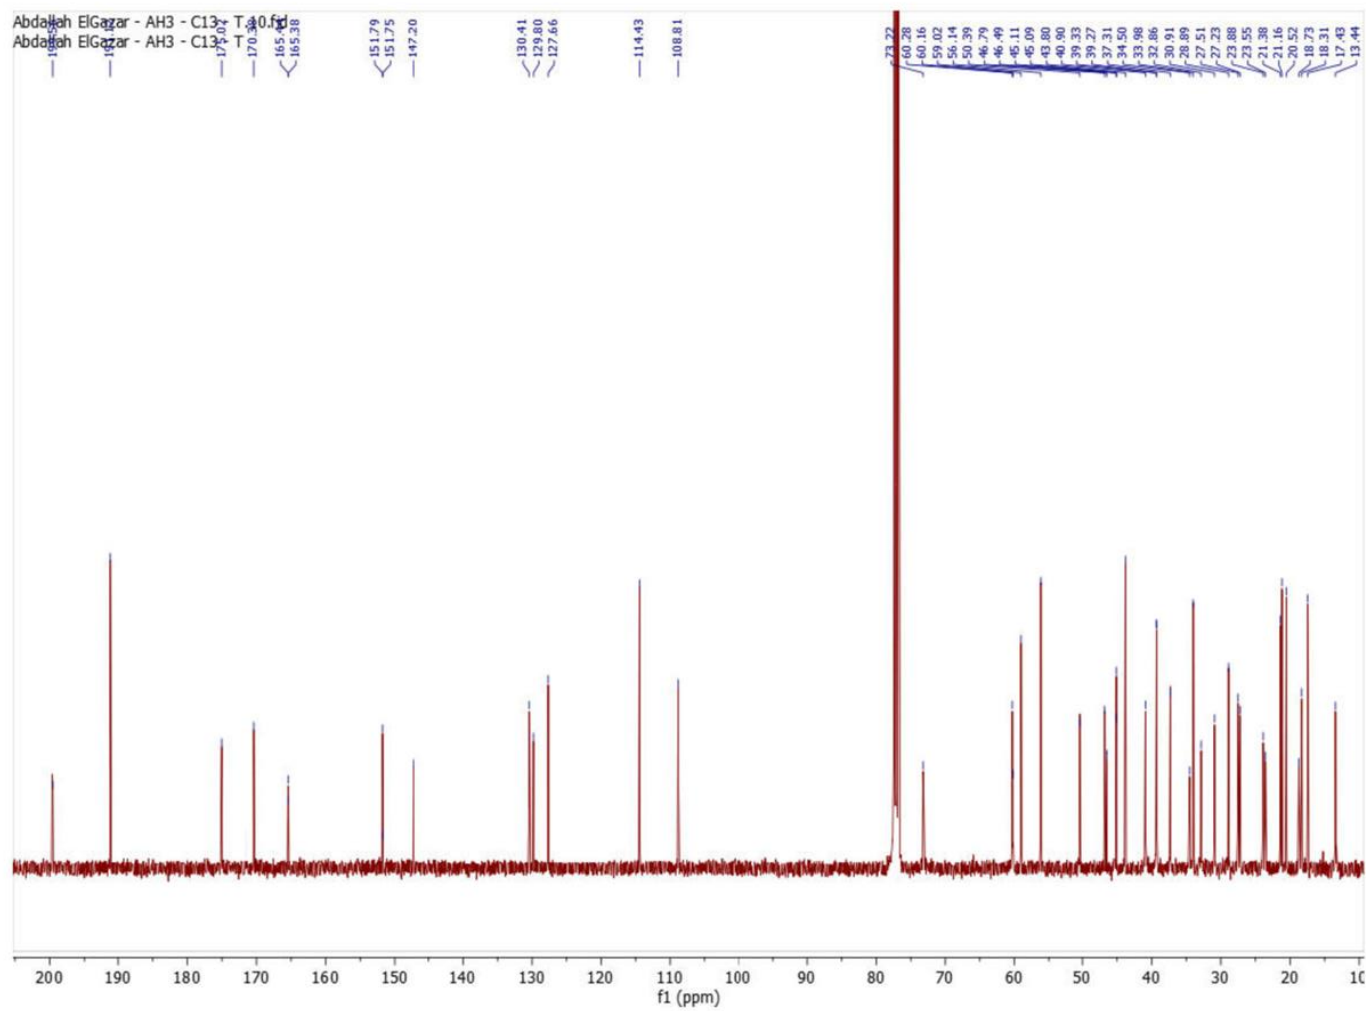

Figure S10.  $^{13}\text{C}$  N.M.R spectrum of compound 5c



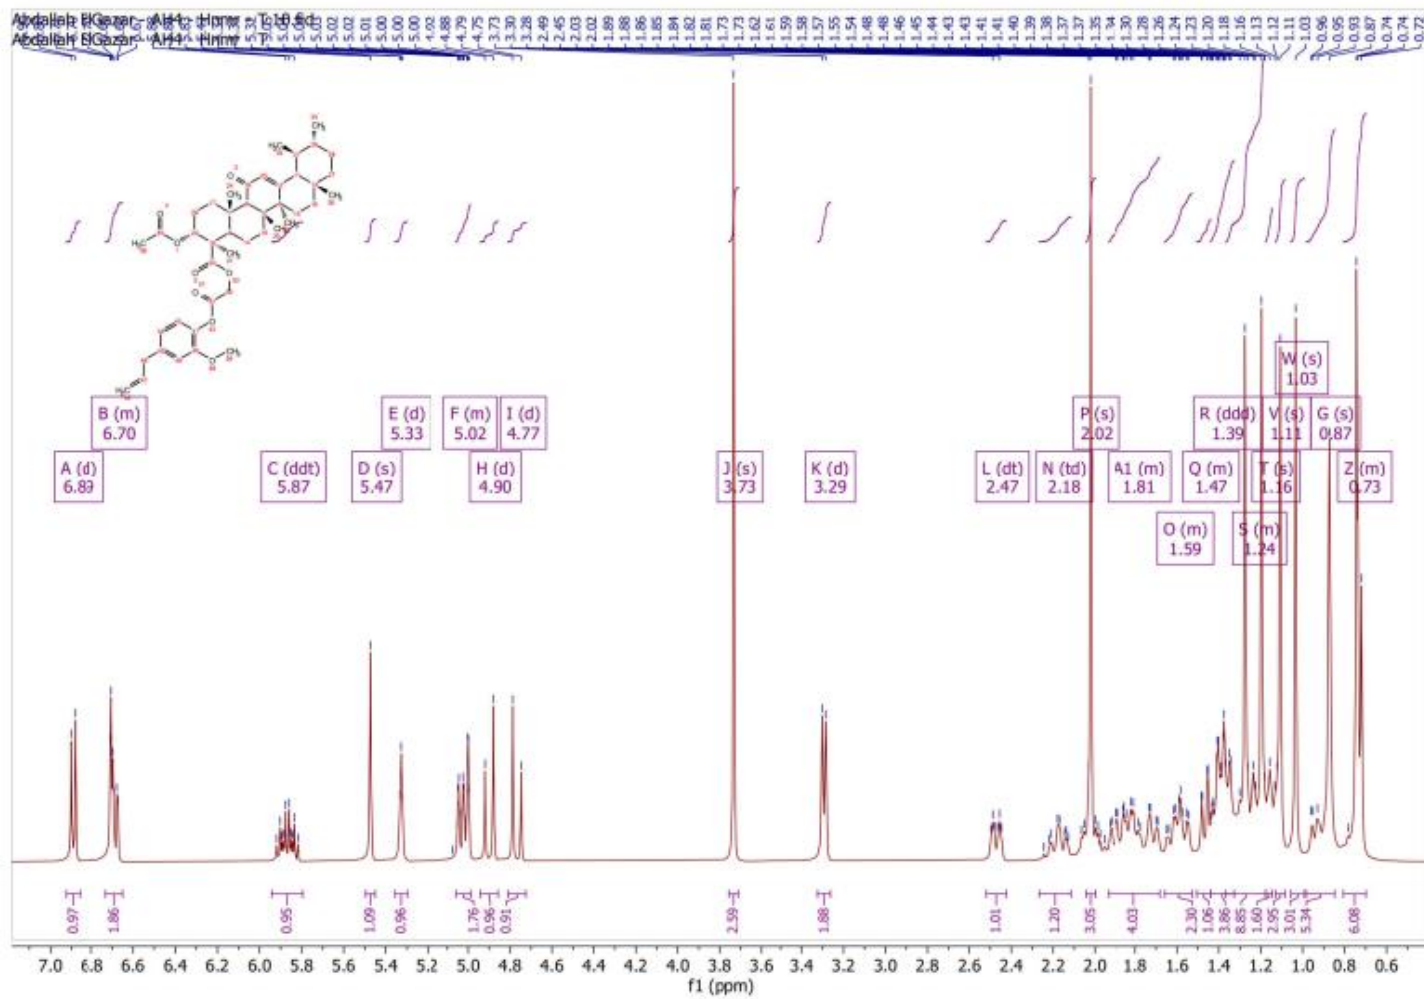

Figure S11. <sup>1</sup>H N.M.R spectrum of compound 5d

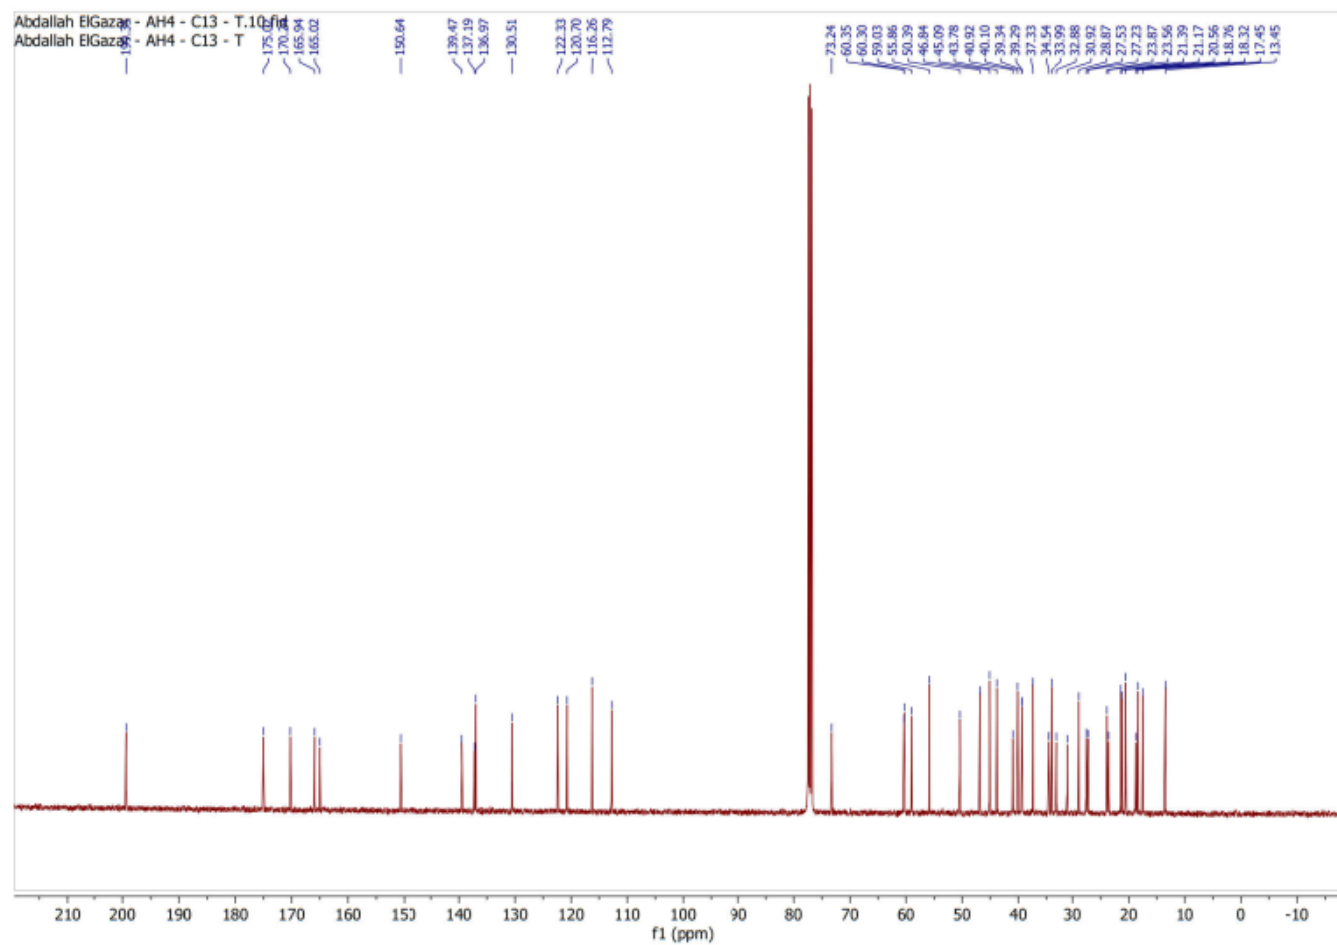

Figure S12.  $^{13}\text{C}$  N.M.R spectrum of compound 5d

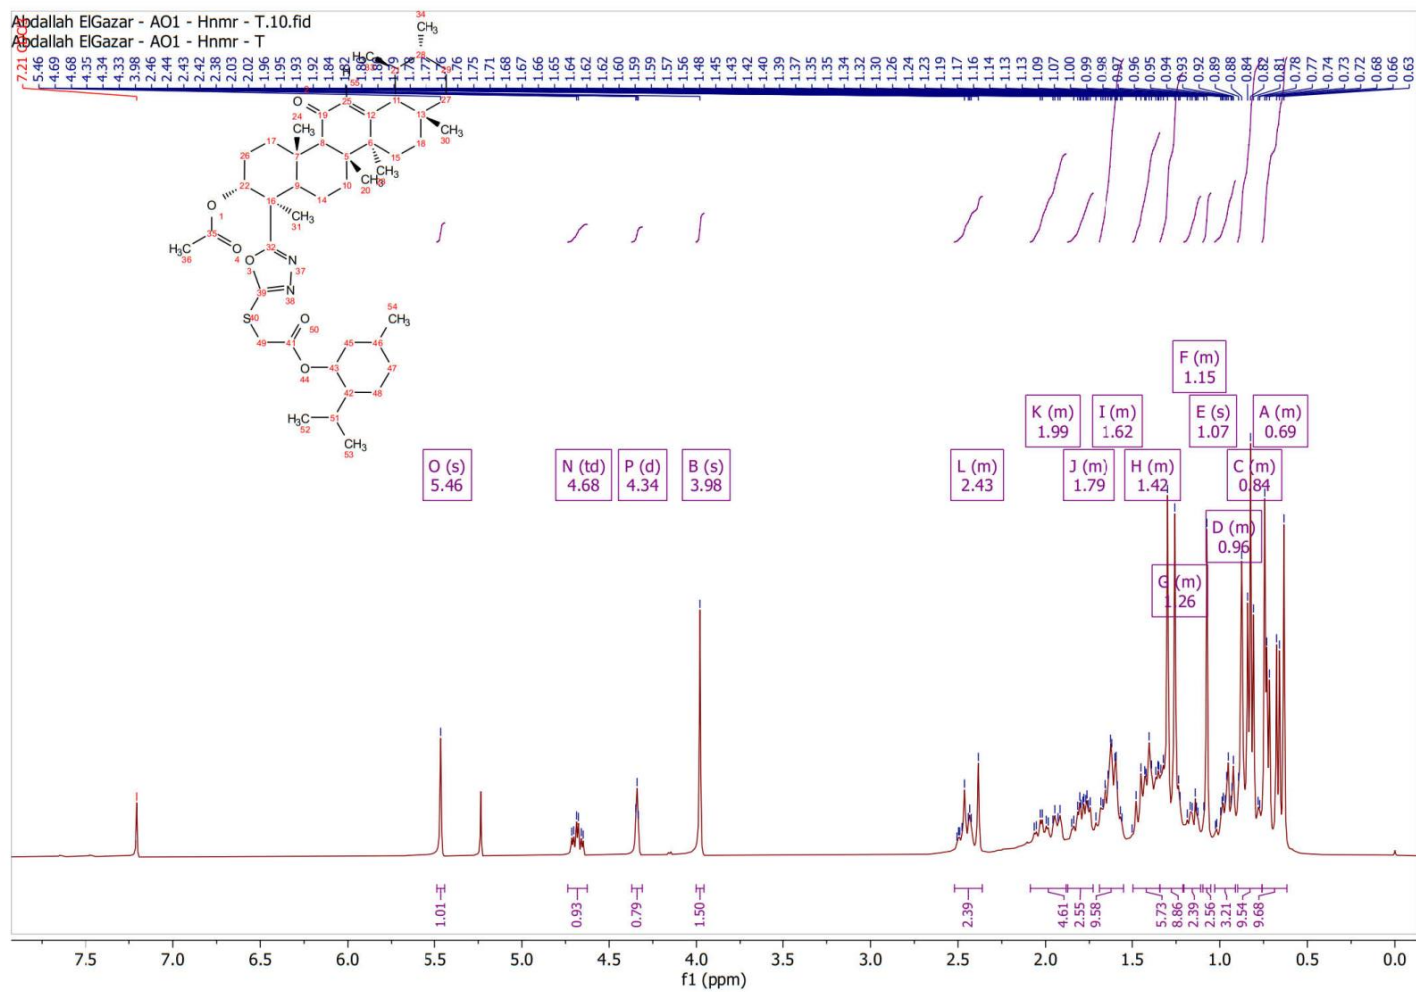

Figure S13. <sup>1</sup>H N.M.R spectrum of compound 8a

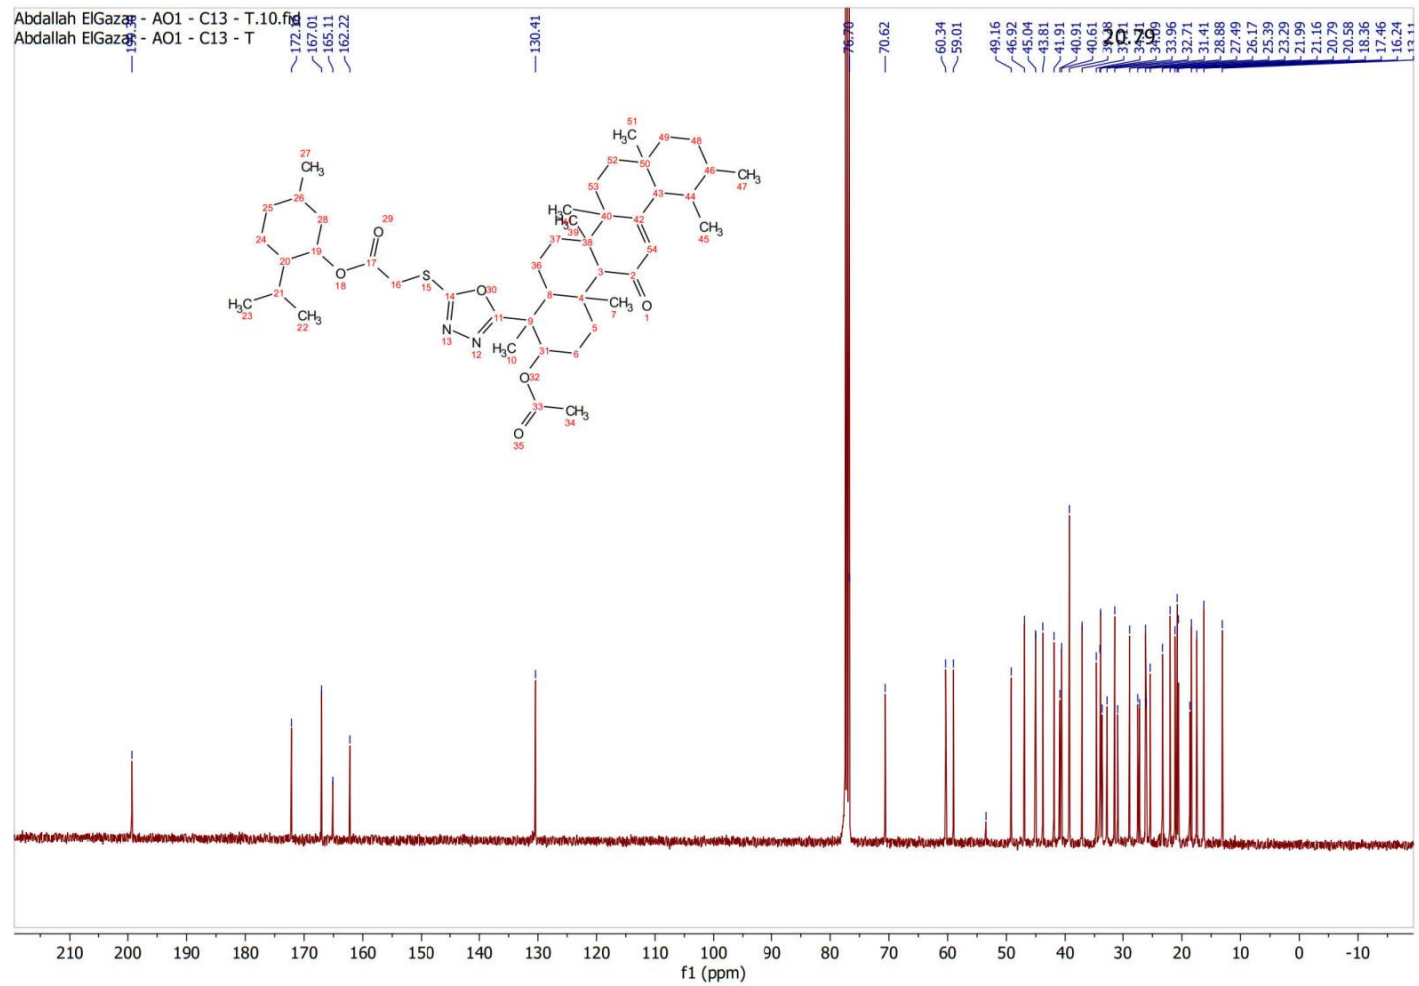

Figure S14.  $^{13}\text{C}$  N.M.R spectrum of compound 8a

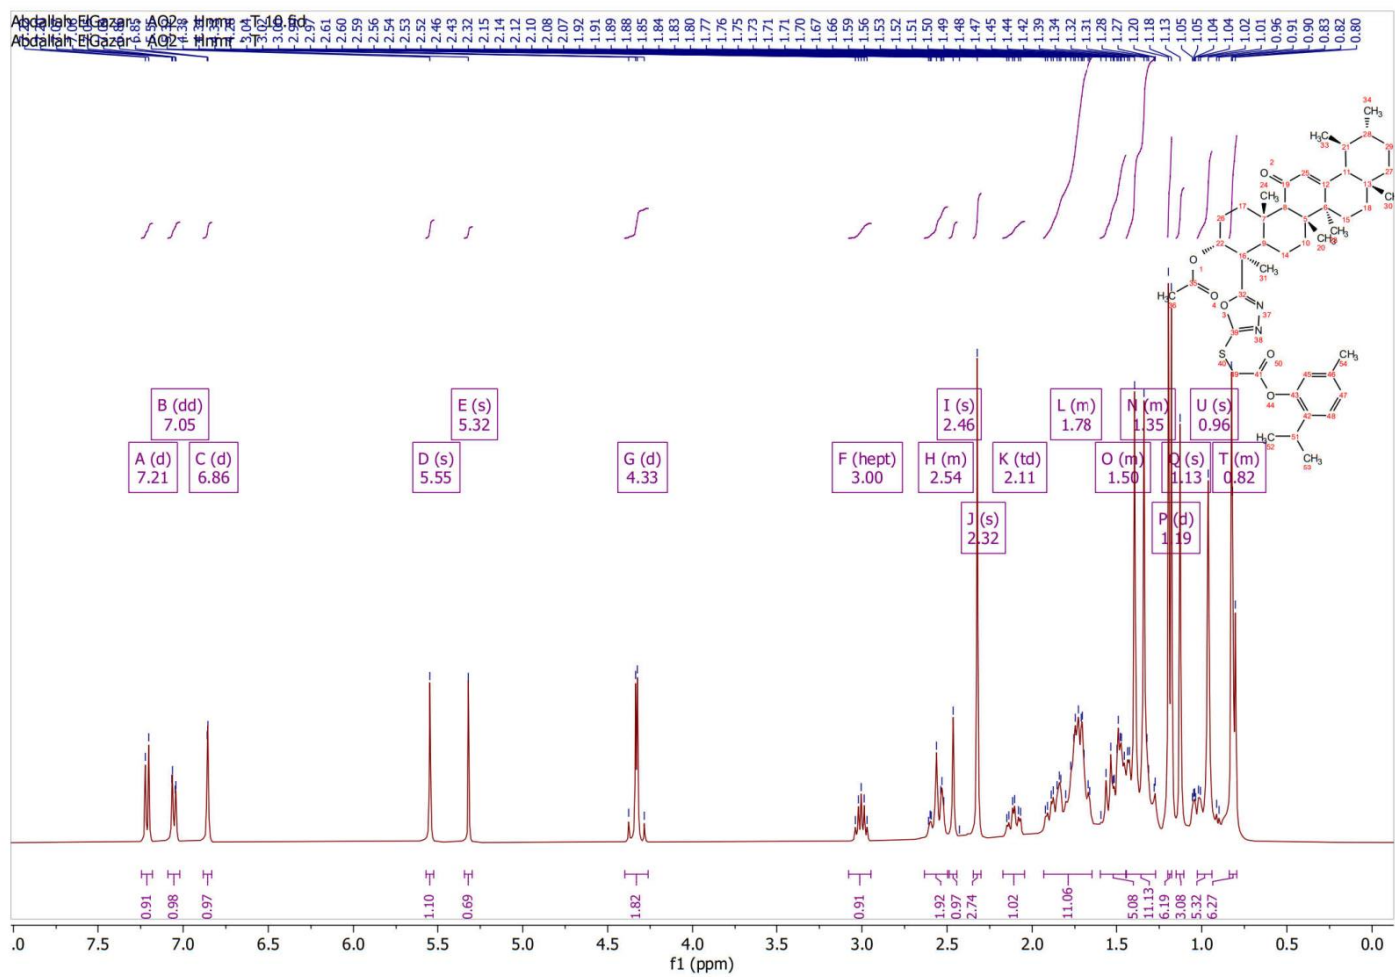

Figure S15. <sup>1</sup>H N.M.R spectrum of compound 8b

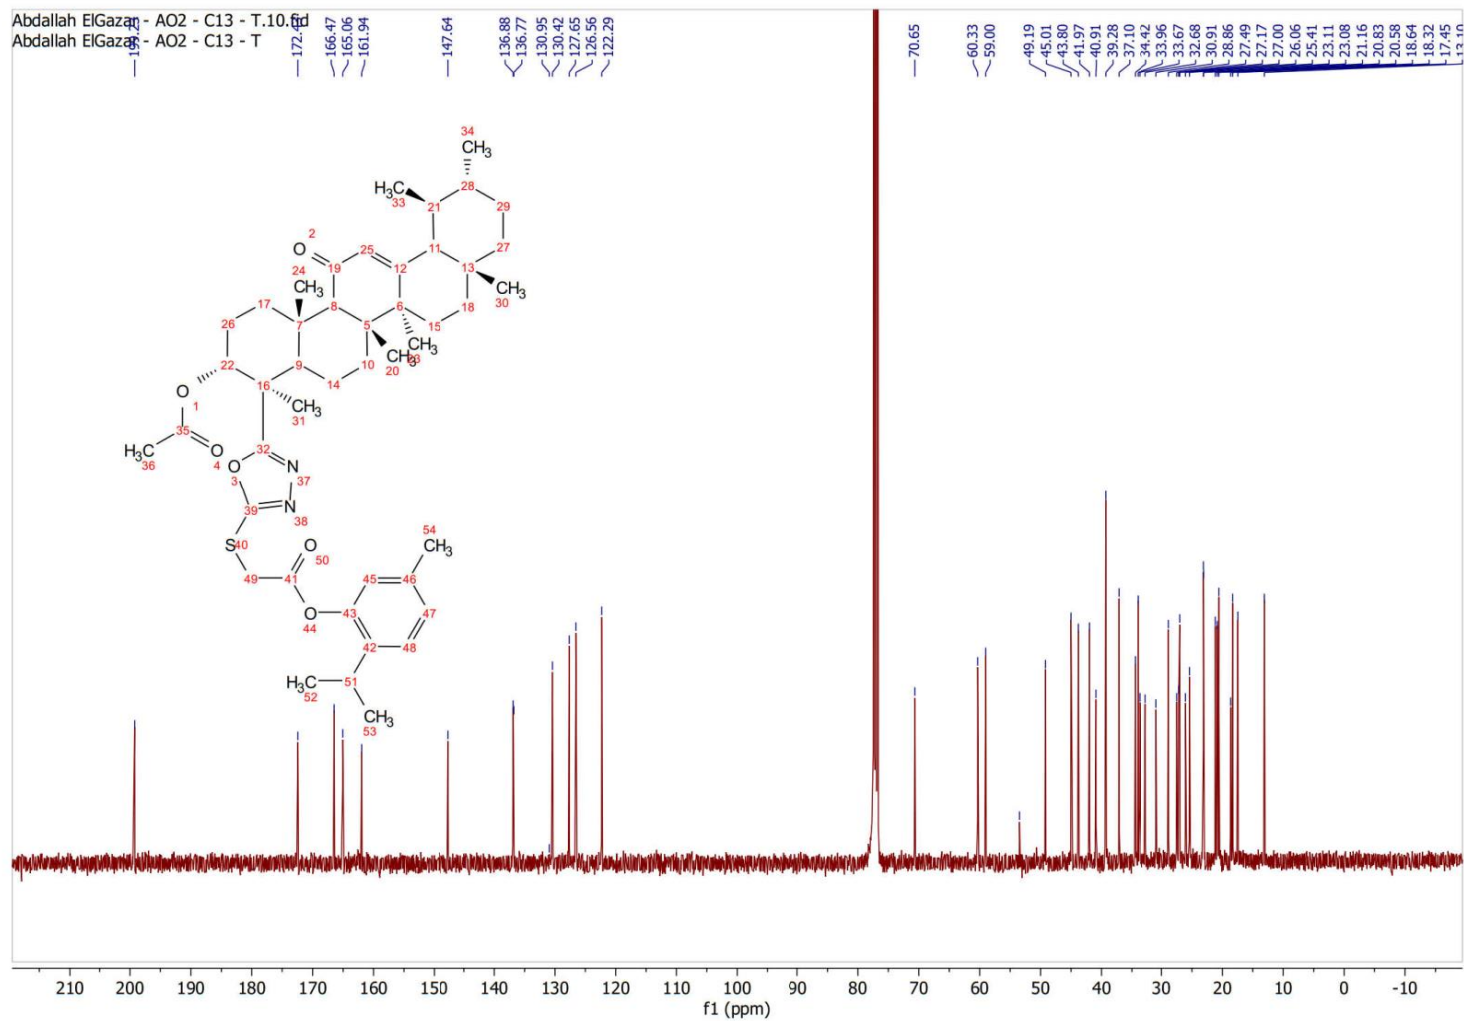

Figure S16.  $^{13}\text{C}$  N.M.R spectrum of compound 8b

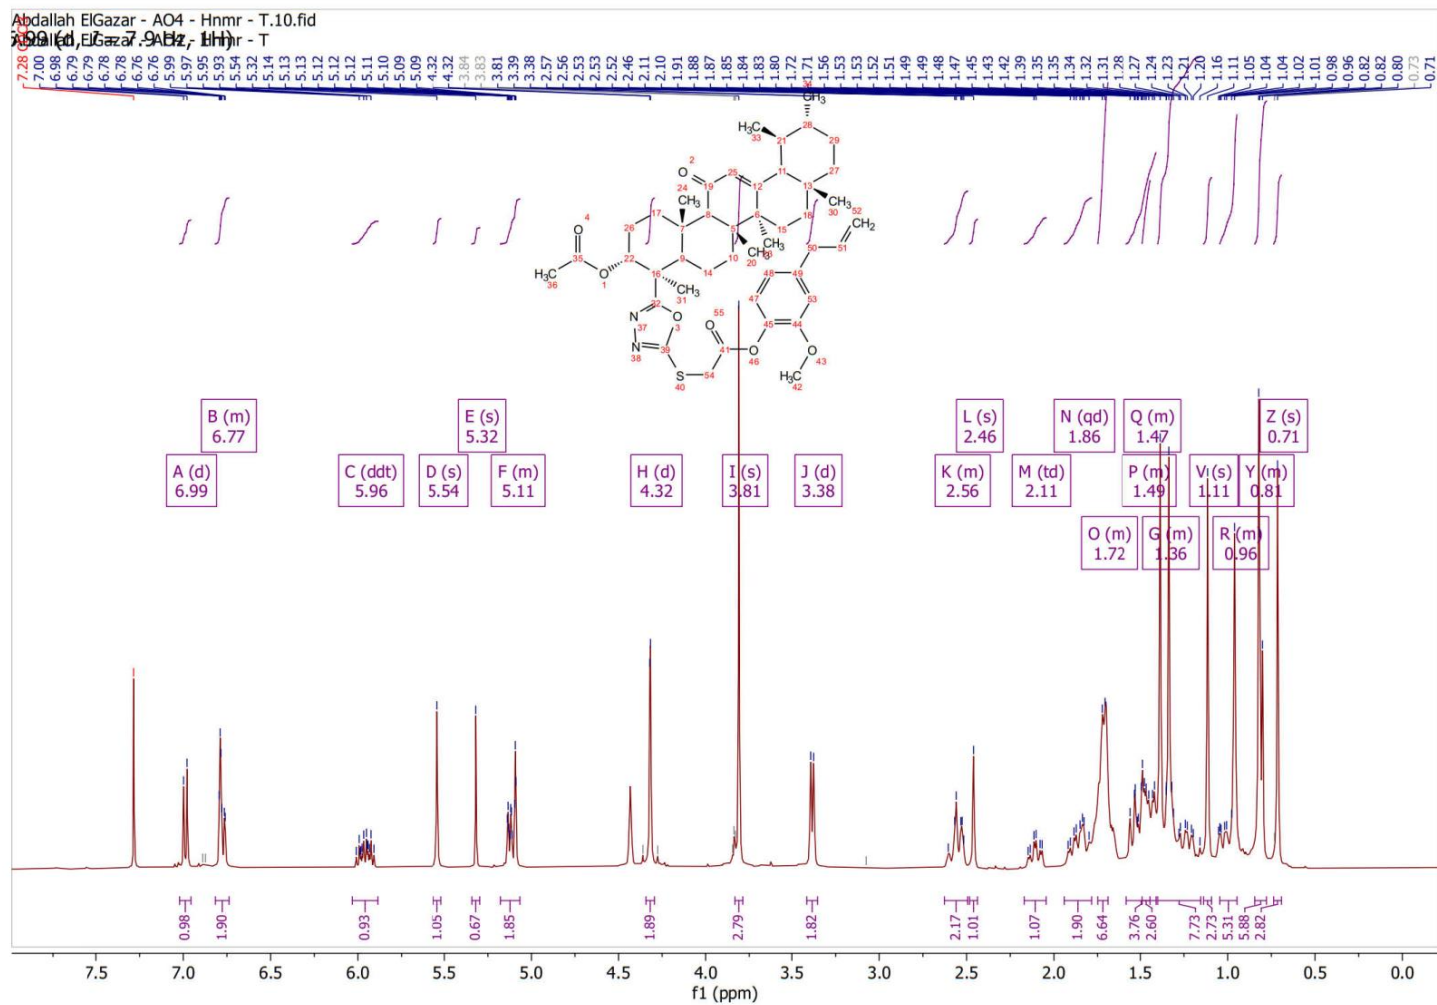

Figure S17.  $^1\text{H}$  N.M.R spectrum of compound 8c

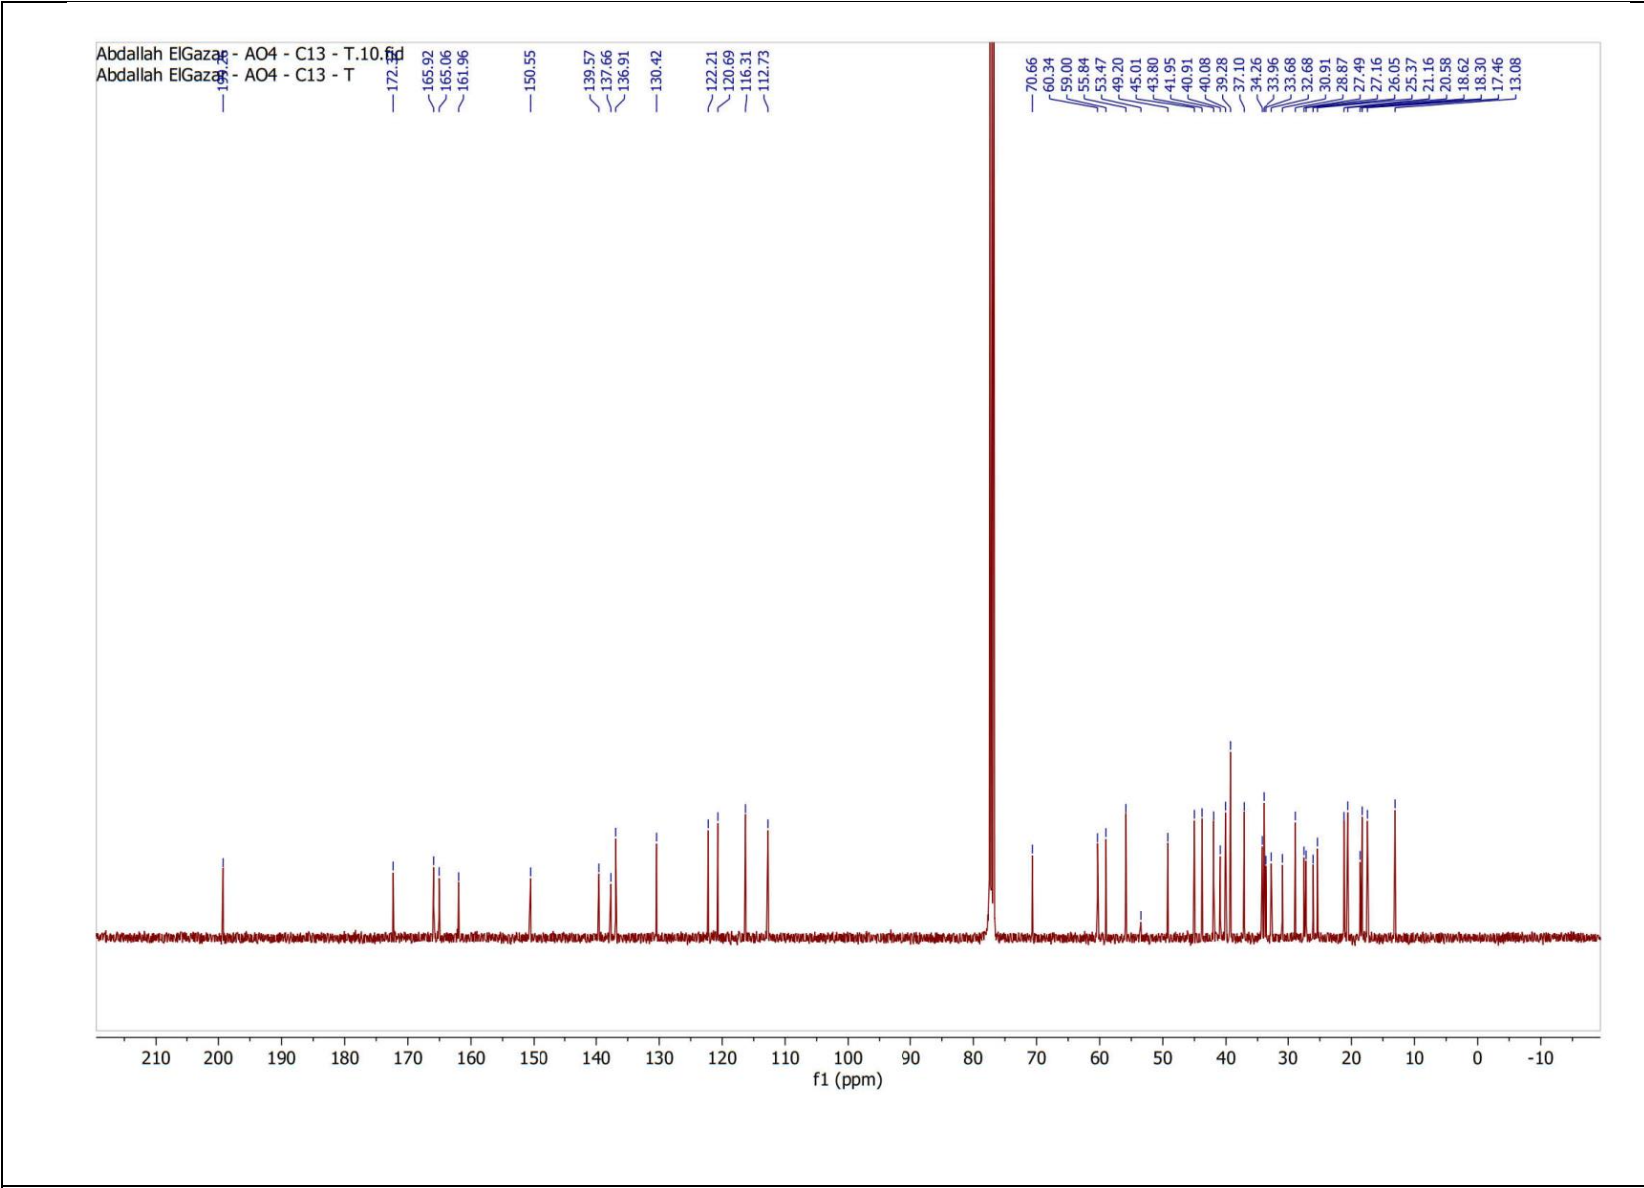

Figure S18. <sup>13</sup>C N.M.R spectrum of compound 8c





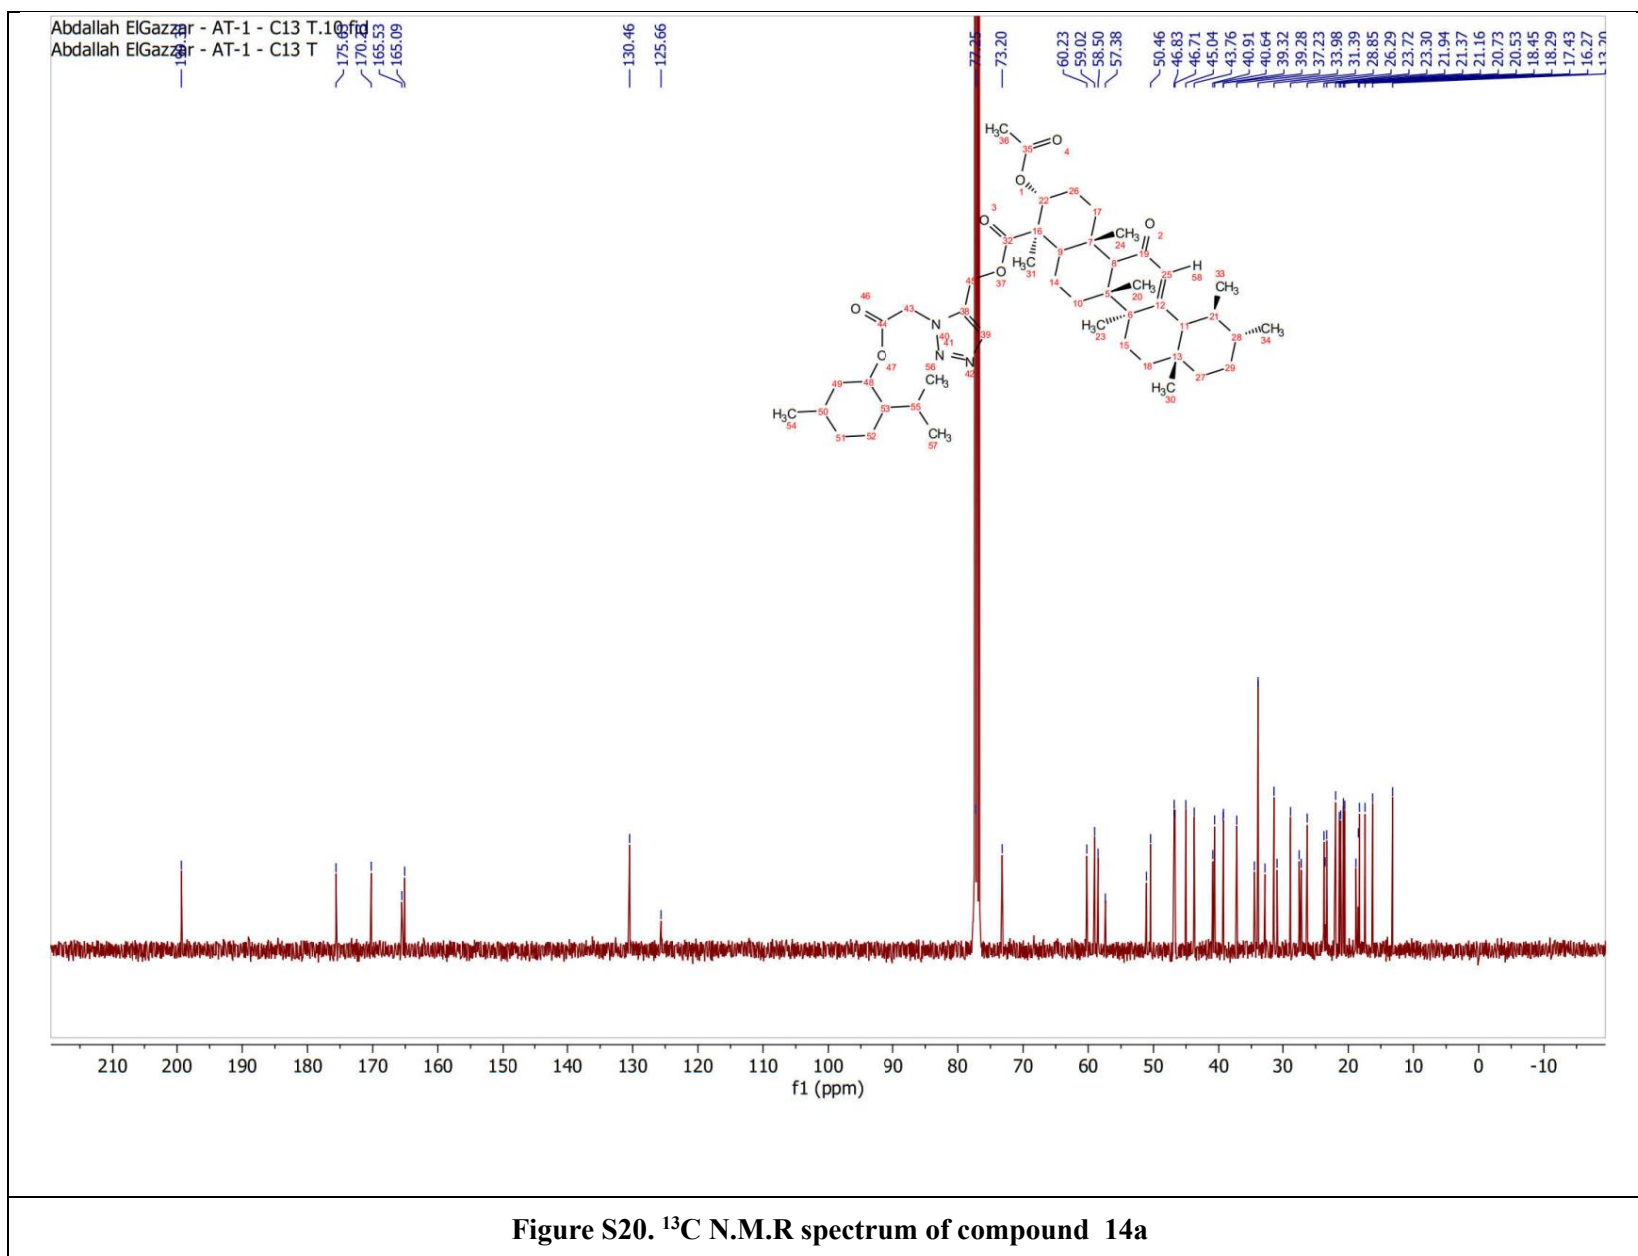

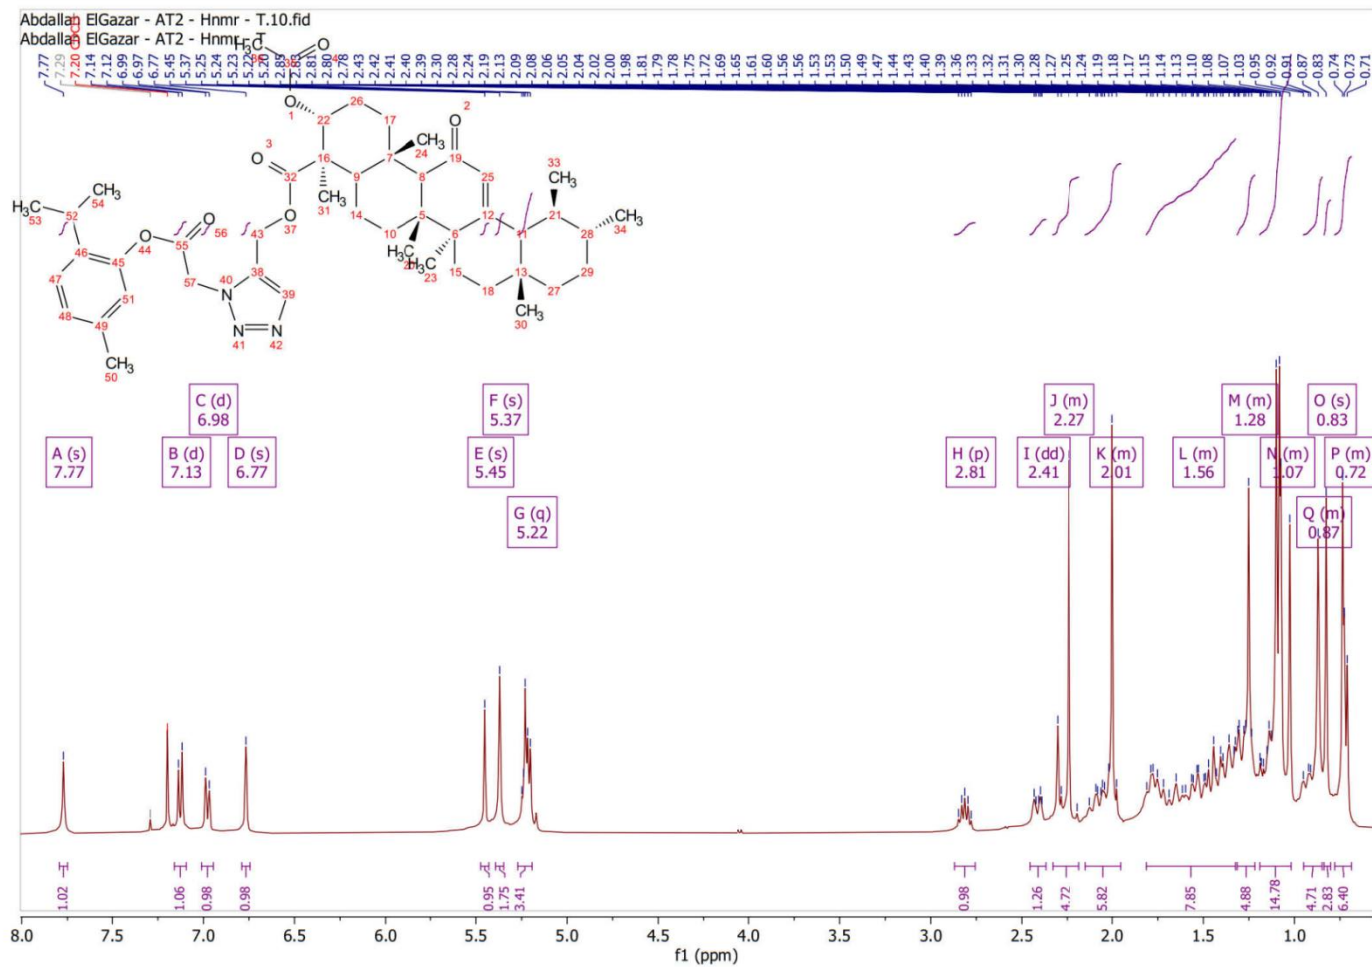

Figure S21. <sup>1</sup>H NMR spectrum of compound 14b

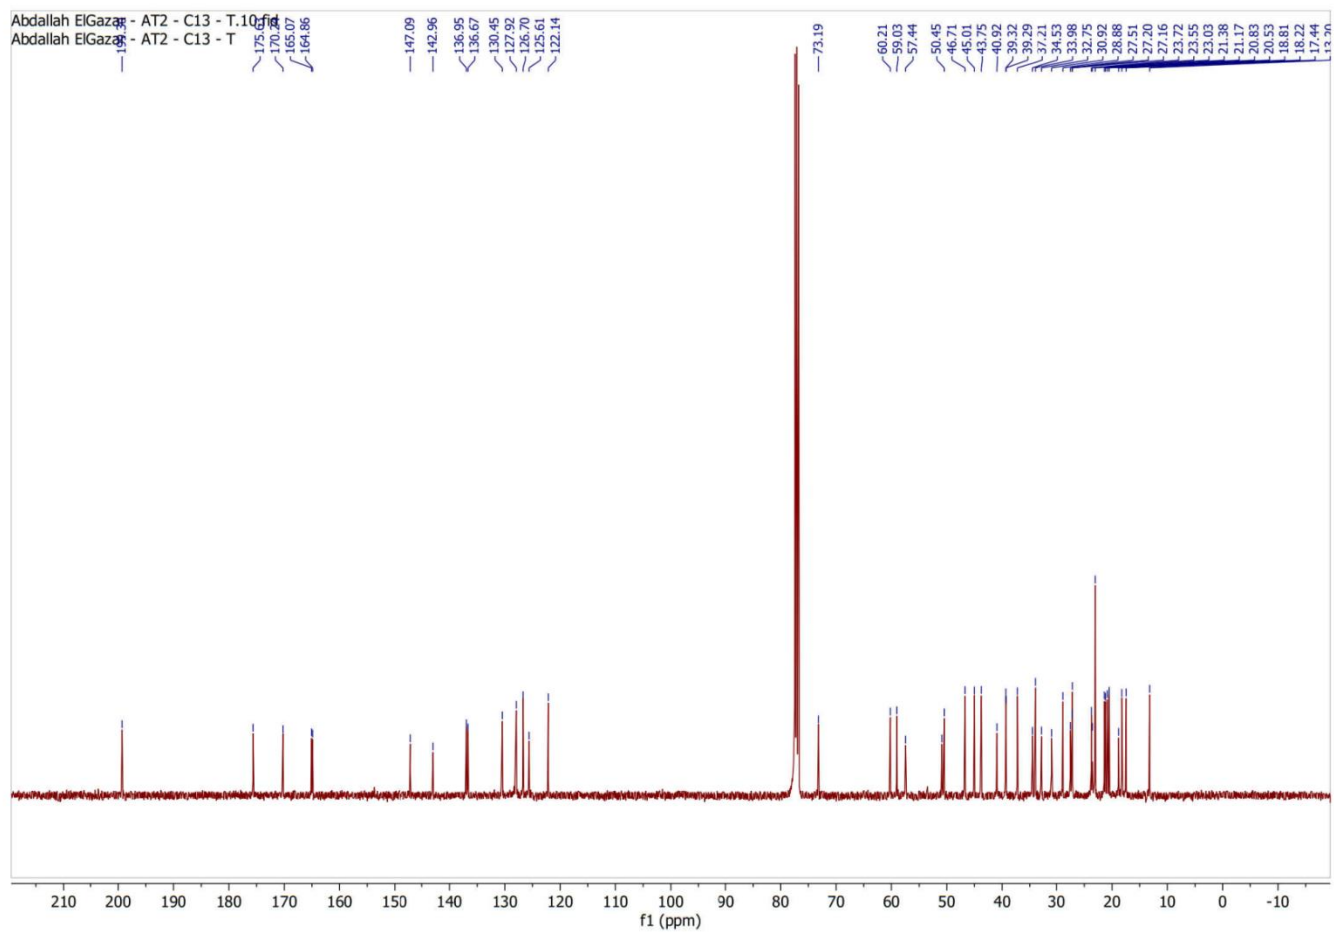

Figure S22.  $^{13}\text{C}$  N.M.R spectrum of compound 14b

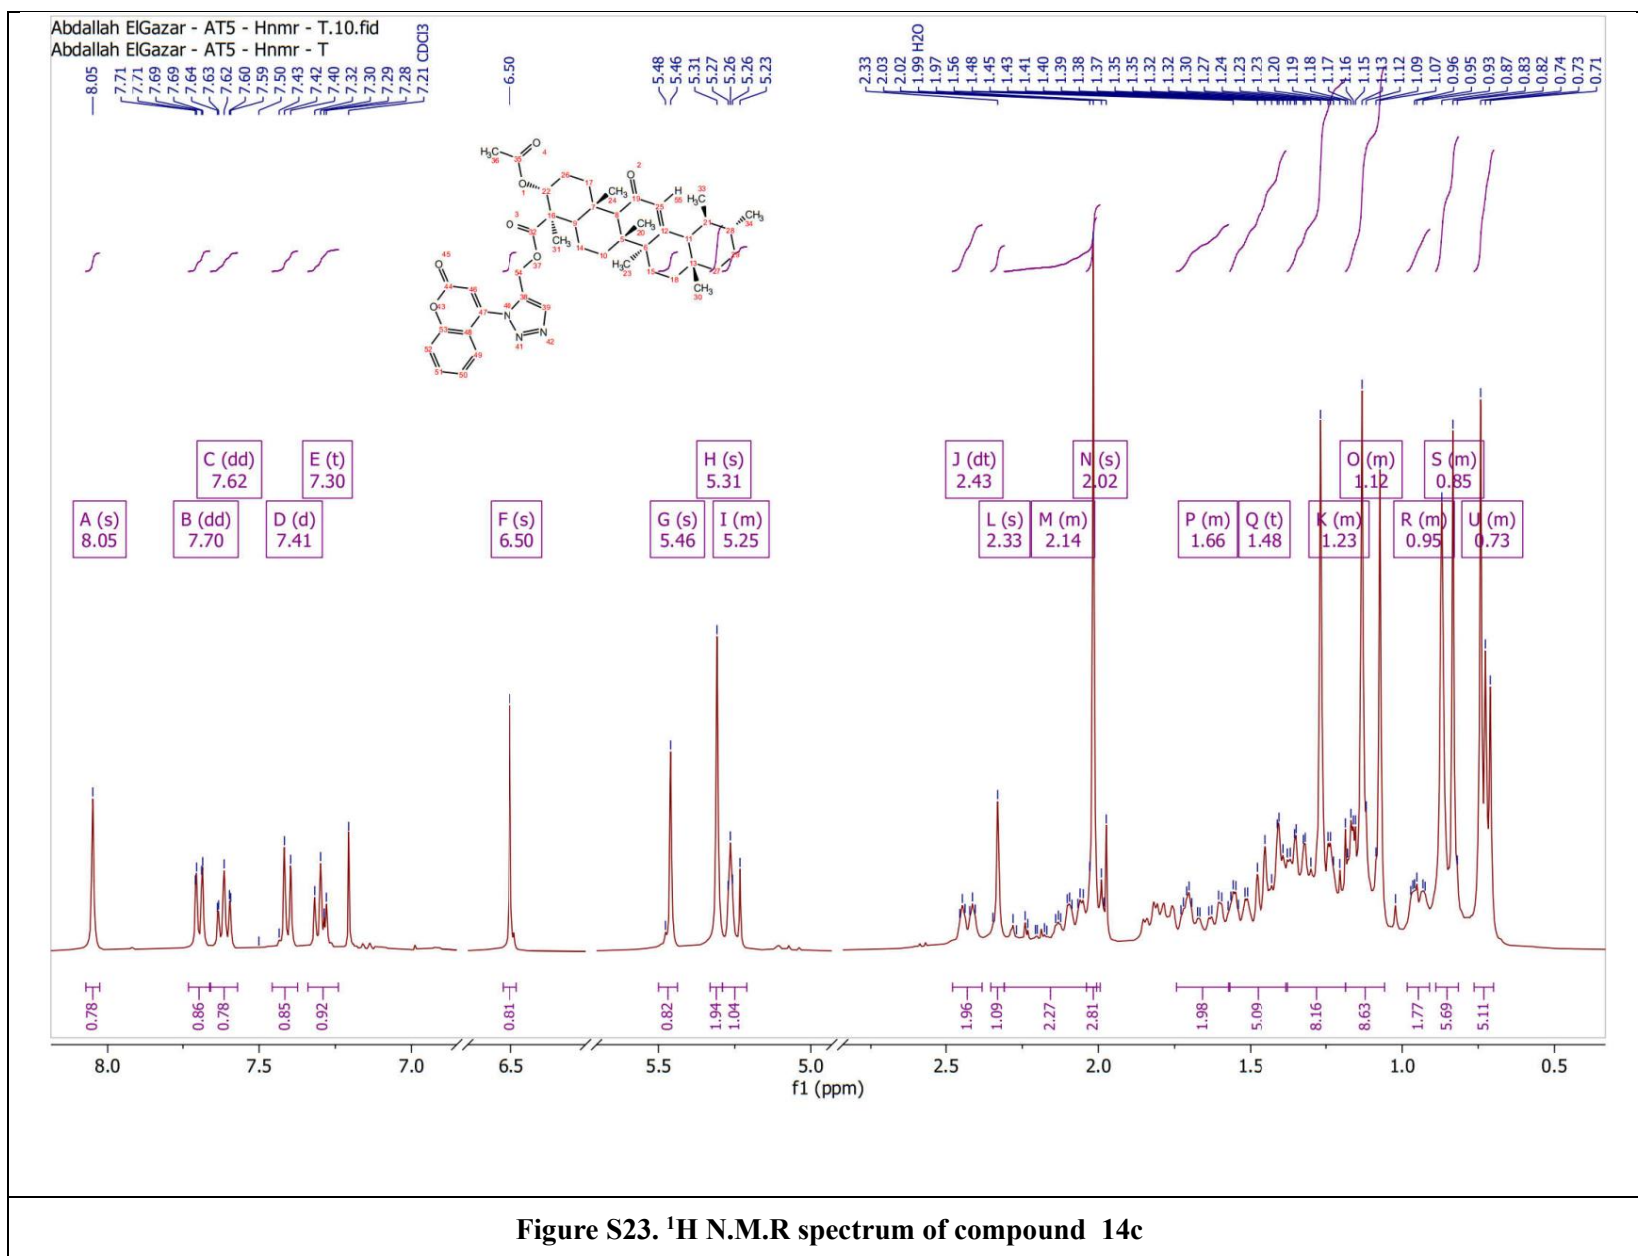

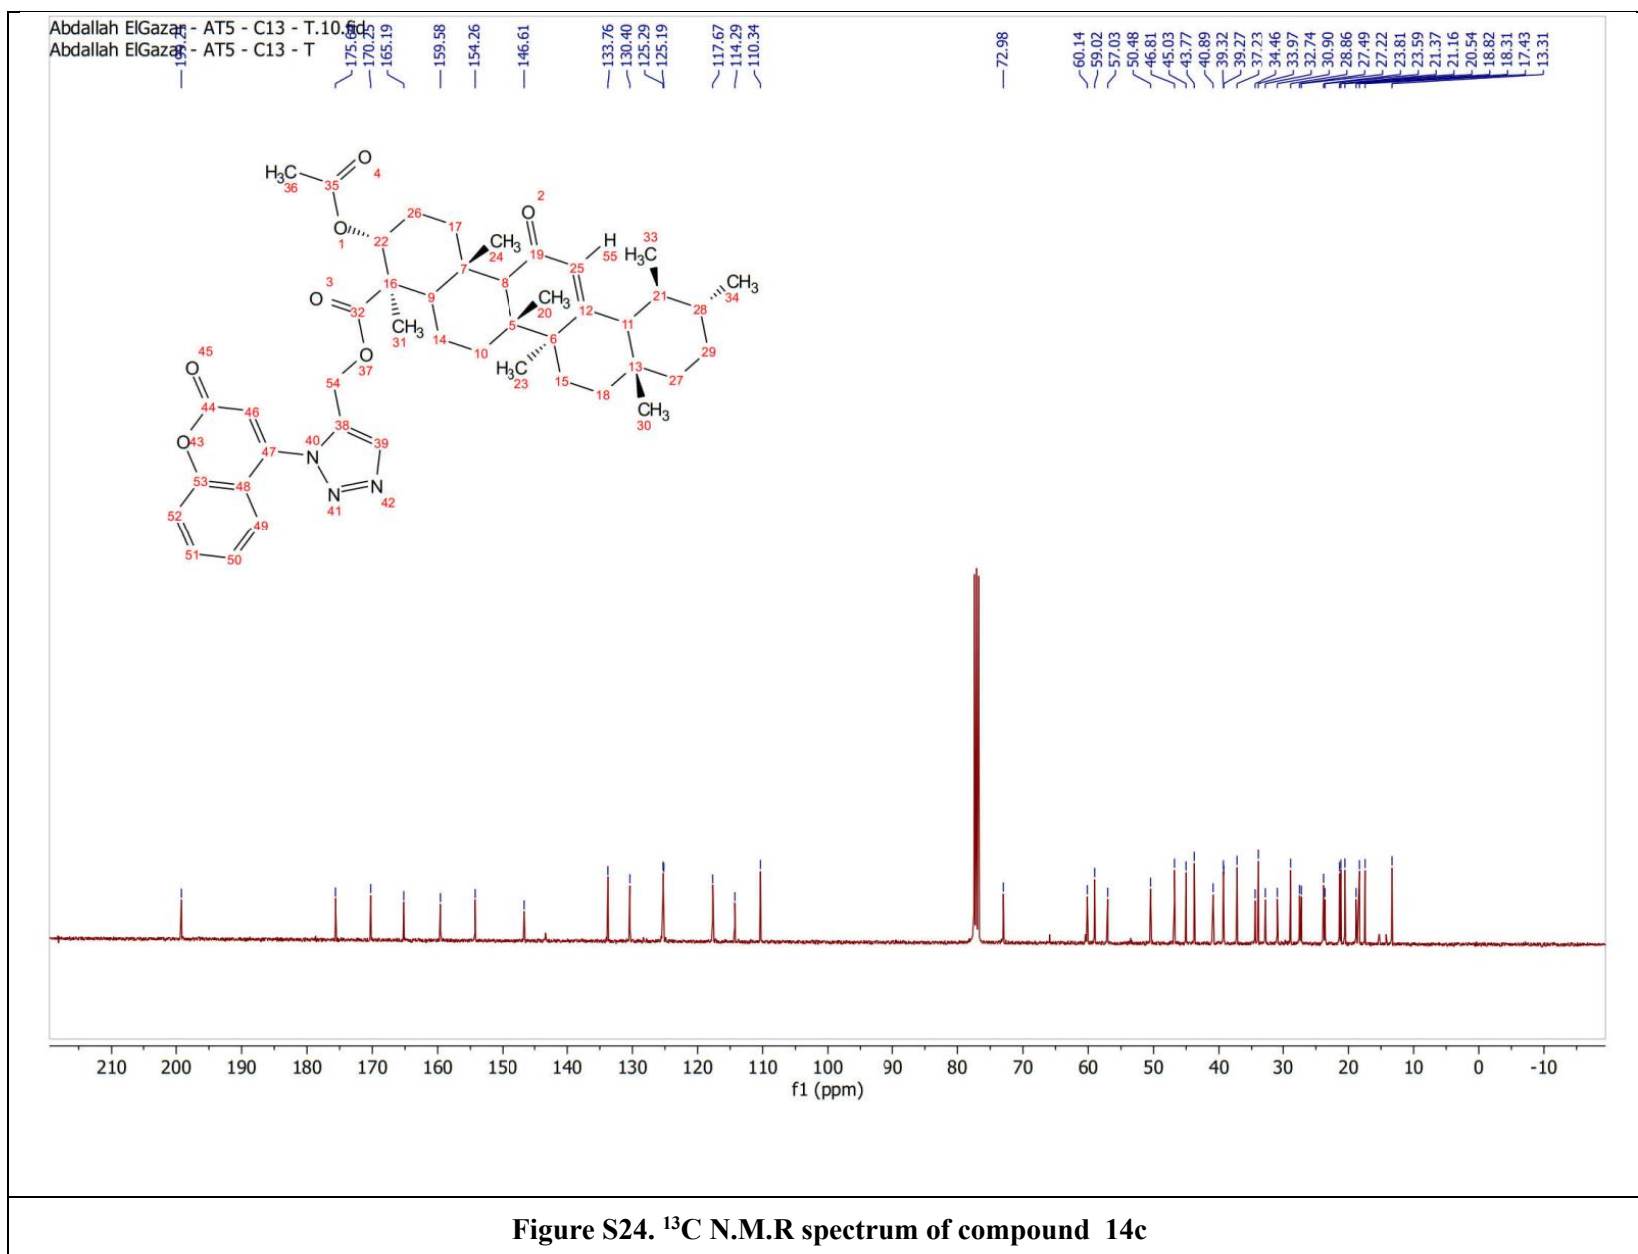

Figure S24.  $^{13}\text{C}$  N.M.R spectrum of compound 14c

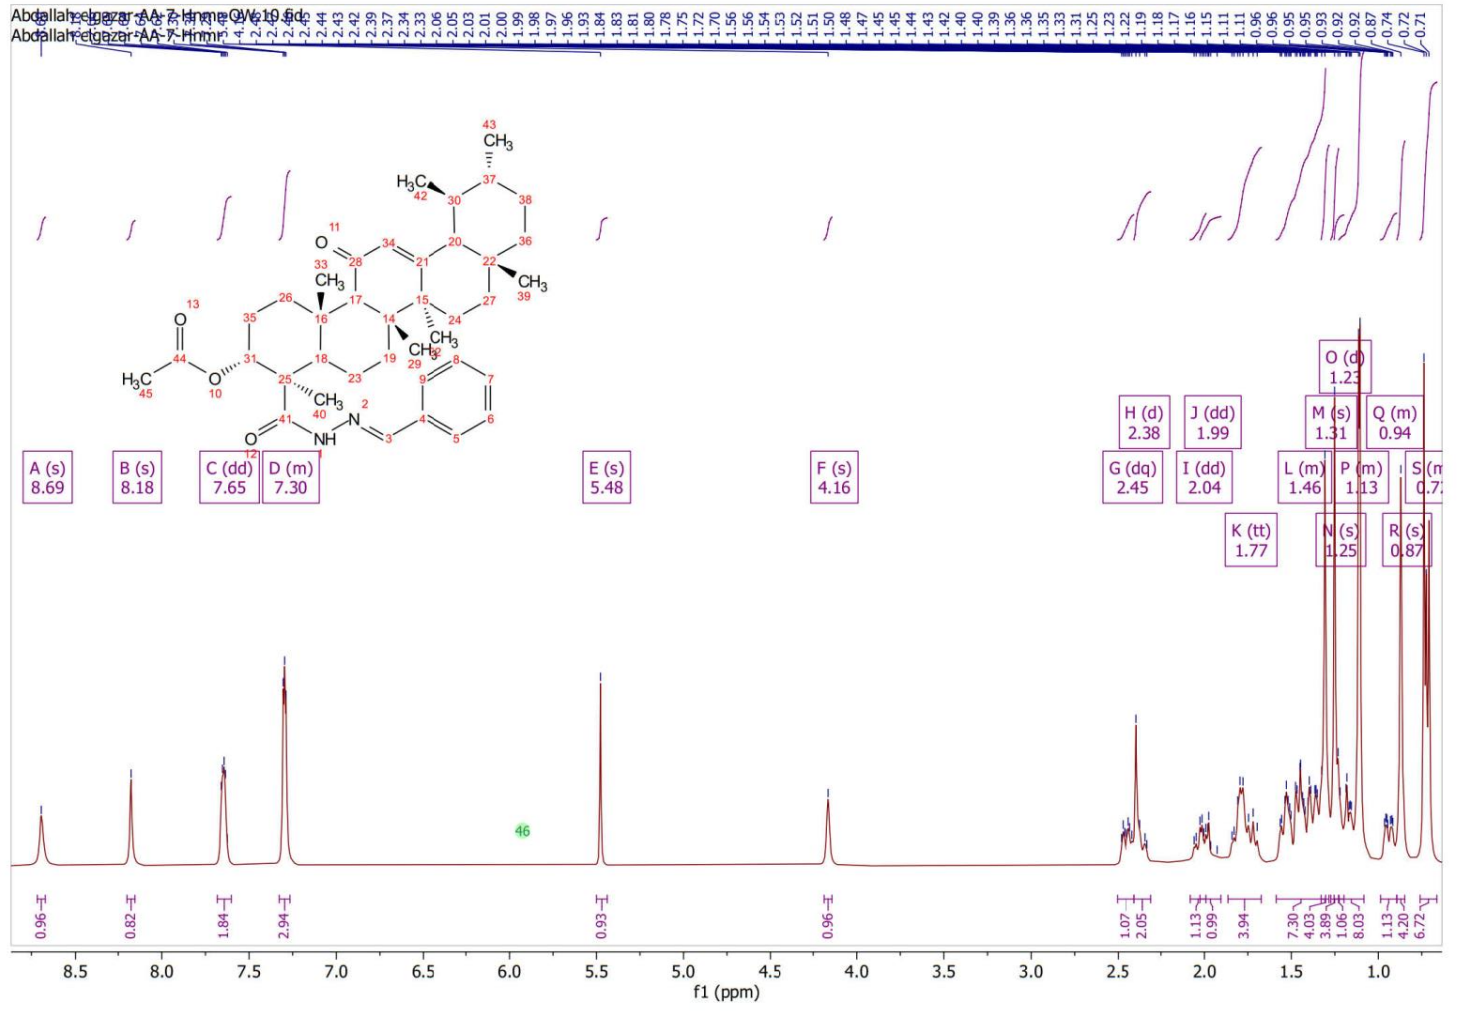

Figure S25. <sup>1</sup>H N.M.R spectrum of compound 16a

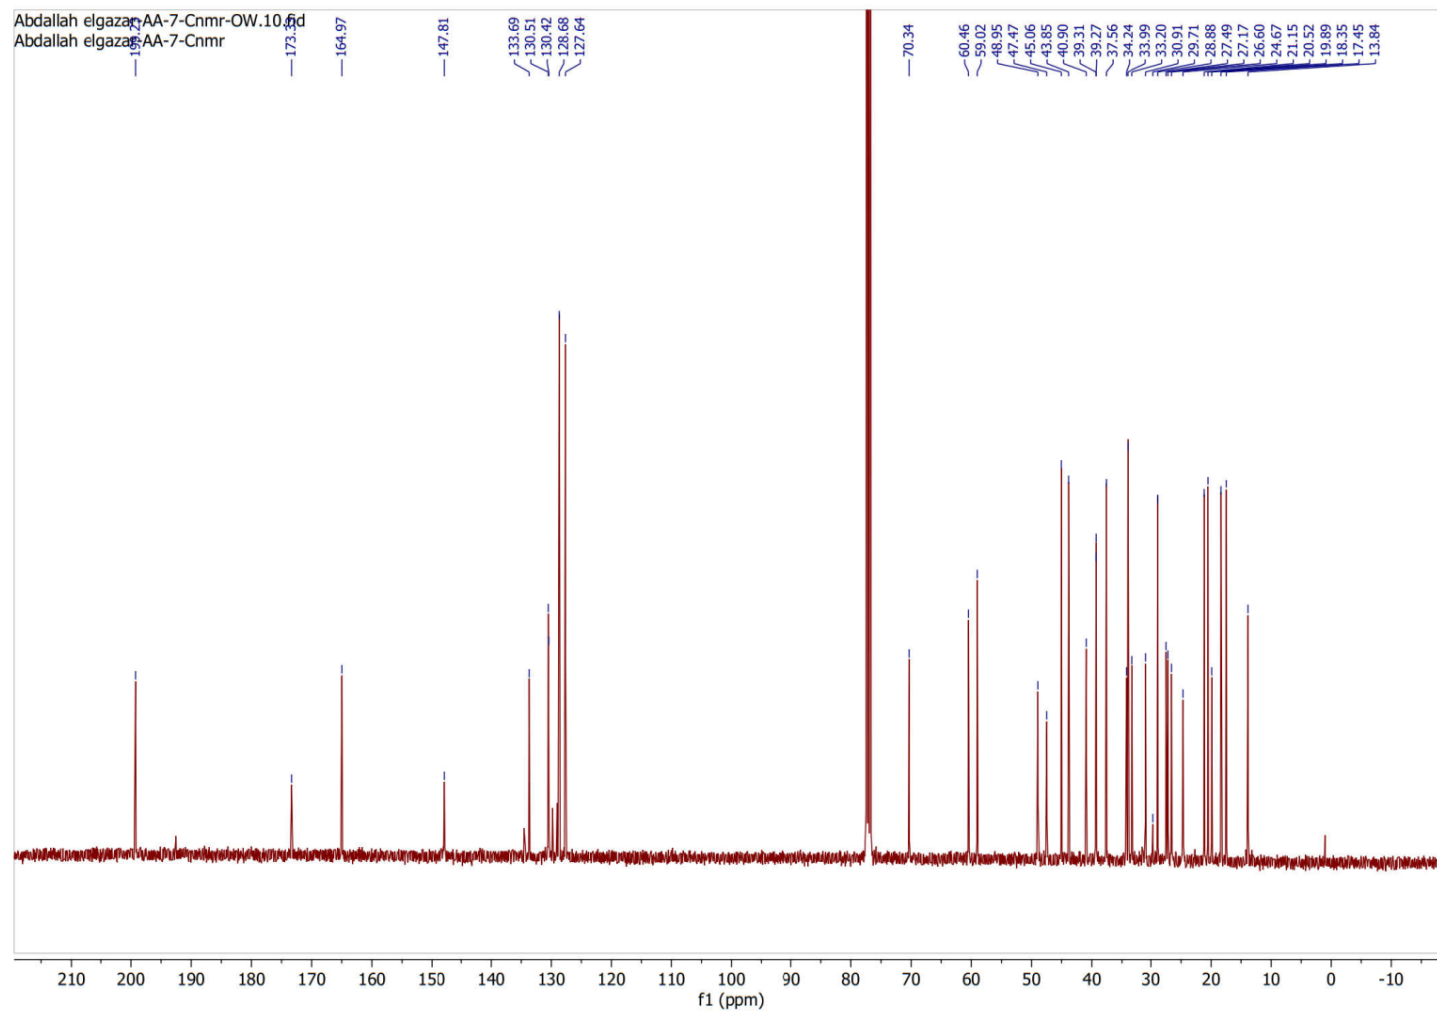

Figure S26.  $^{13}\text{C}$  N.M.R spectrum of compound 16a



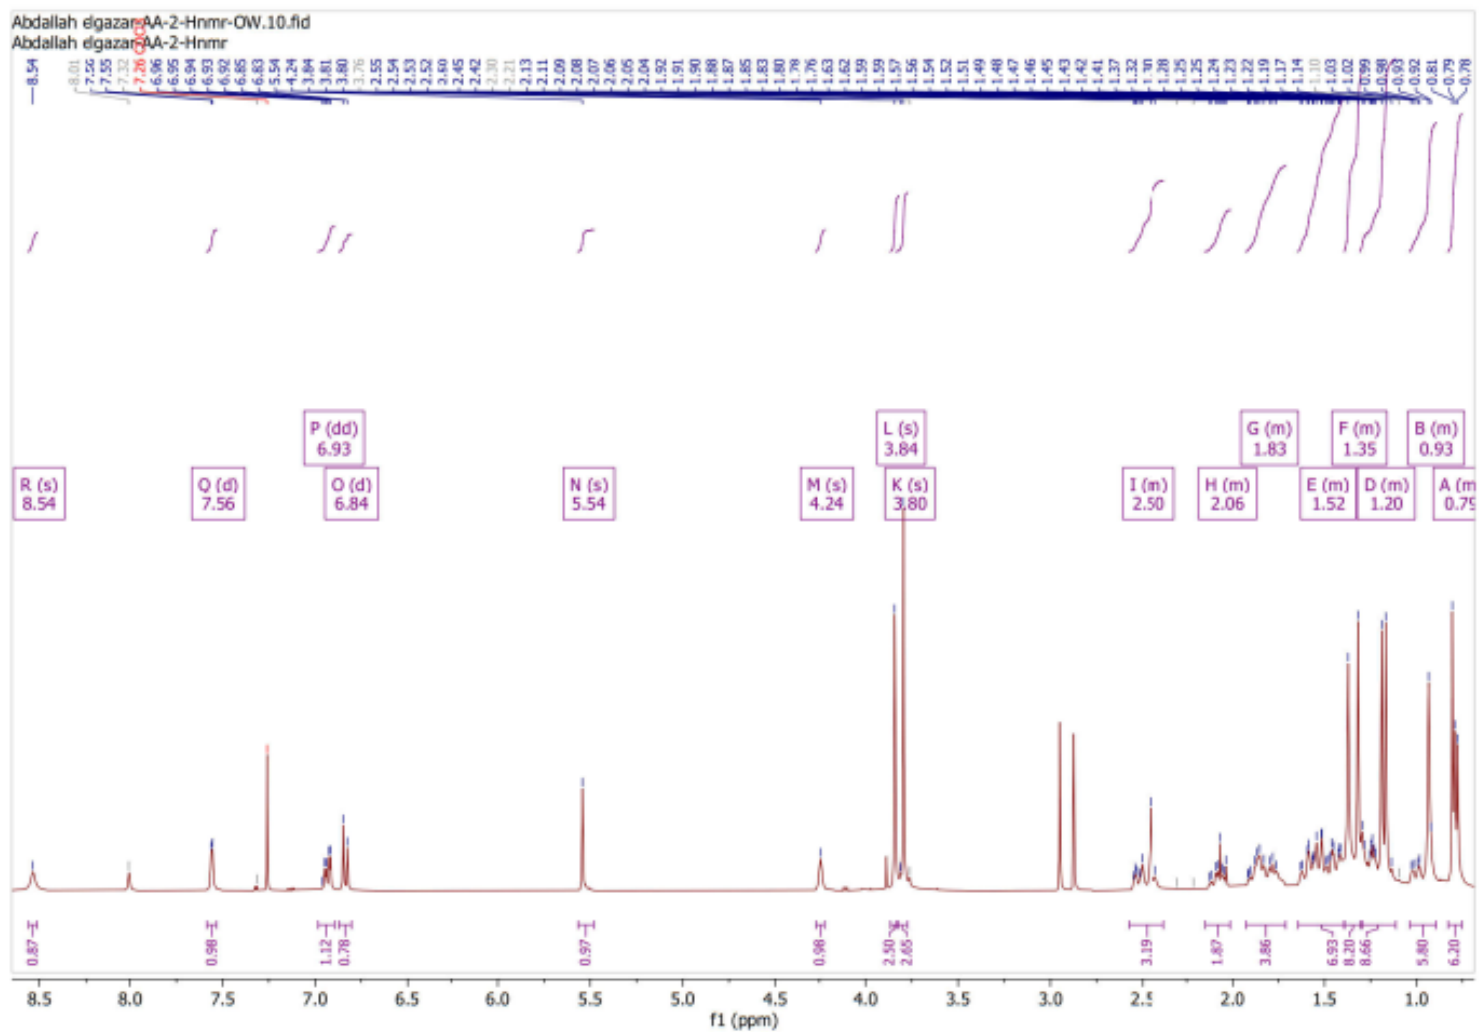

Figure S27. <sup>1</sup>H N.M.R spectrum of compound 16b

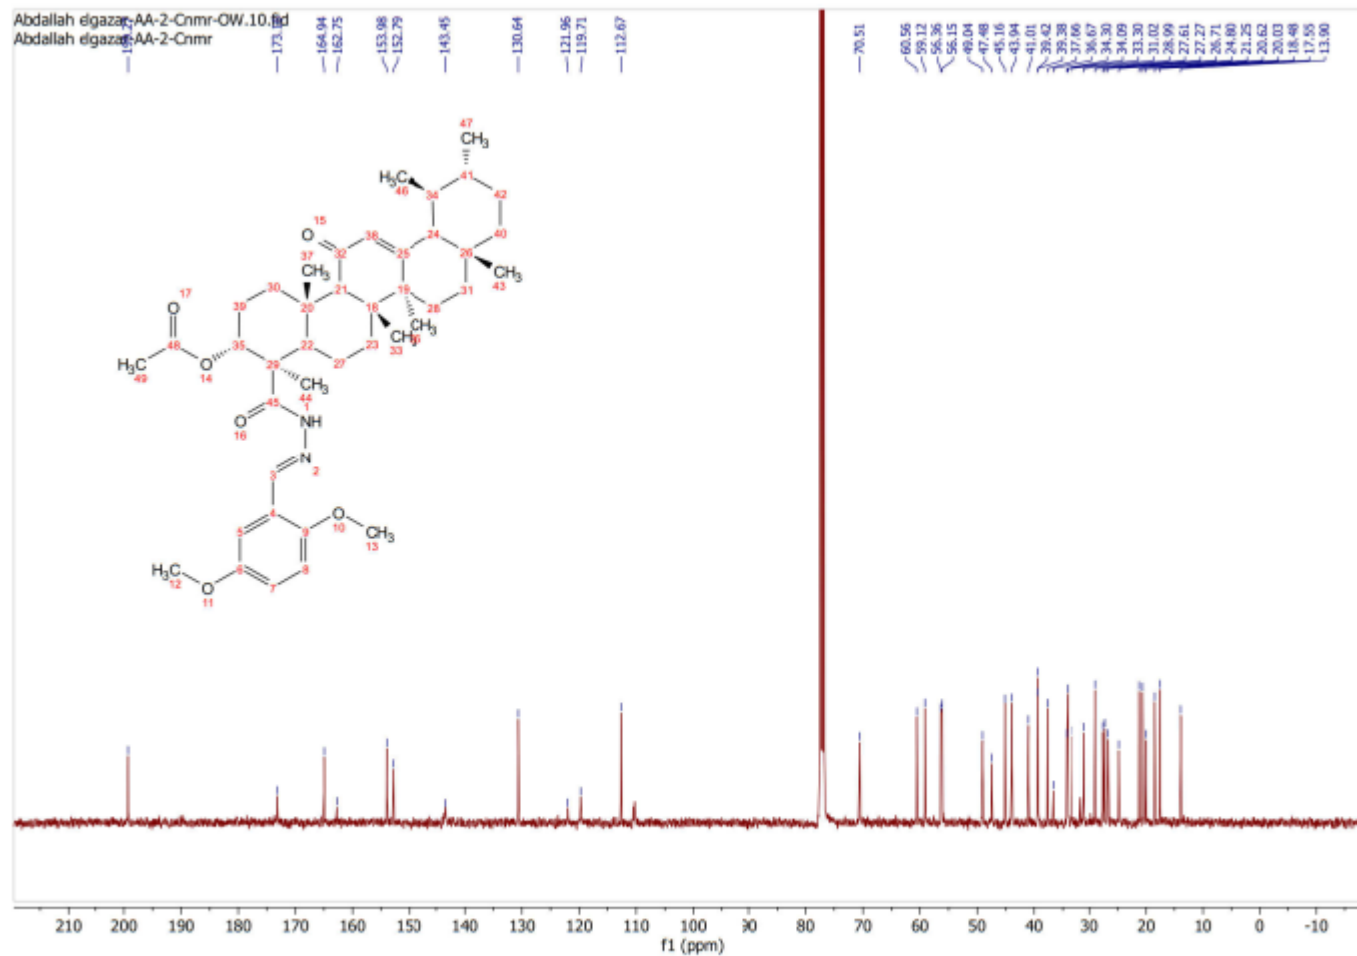

Figure S28.  $^{13}\text{C}$  N.M.R spectrum of compound 16b

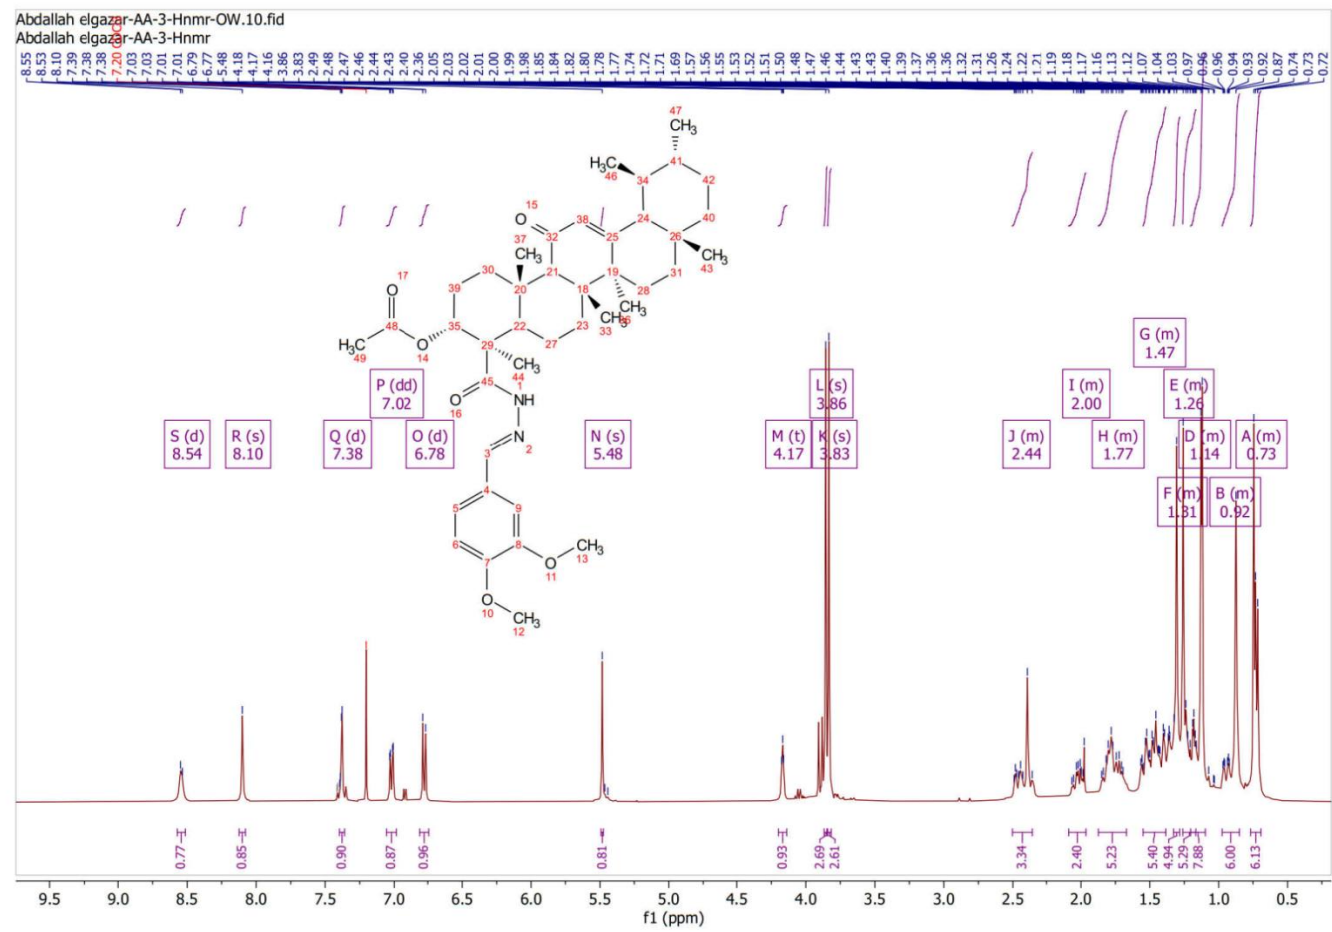

Figure S29. <sup>1</sup>H N.M.R spectrum of compound 16c

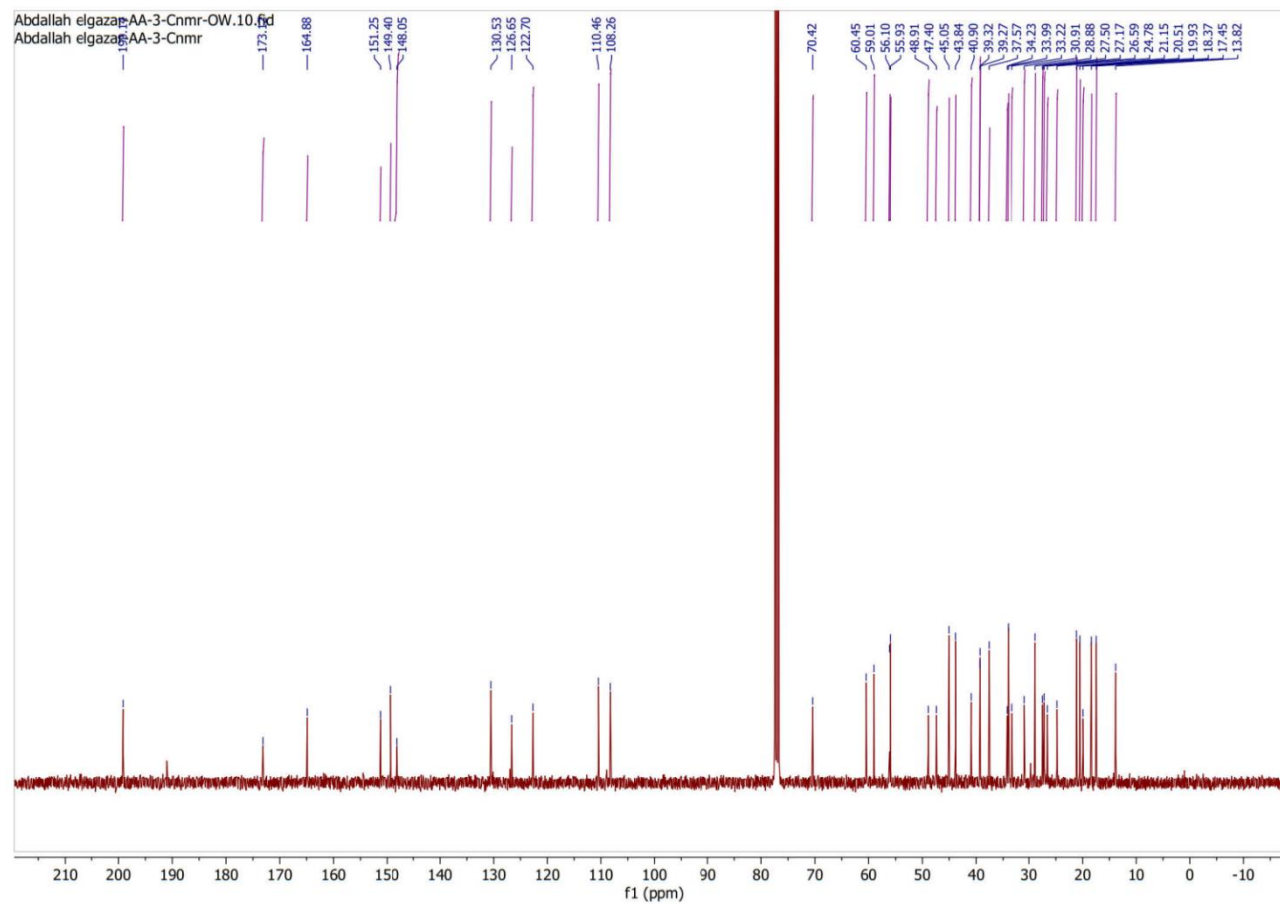

Figure S30.  $^{13}\text{C}$  N.M.R spectrum of compound 16c

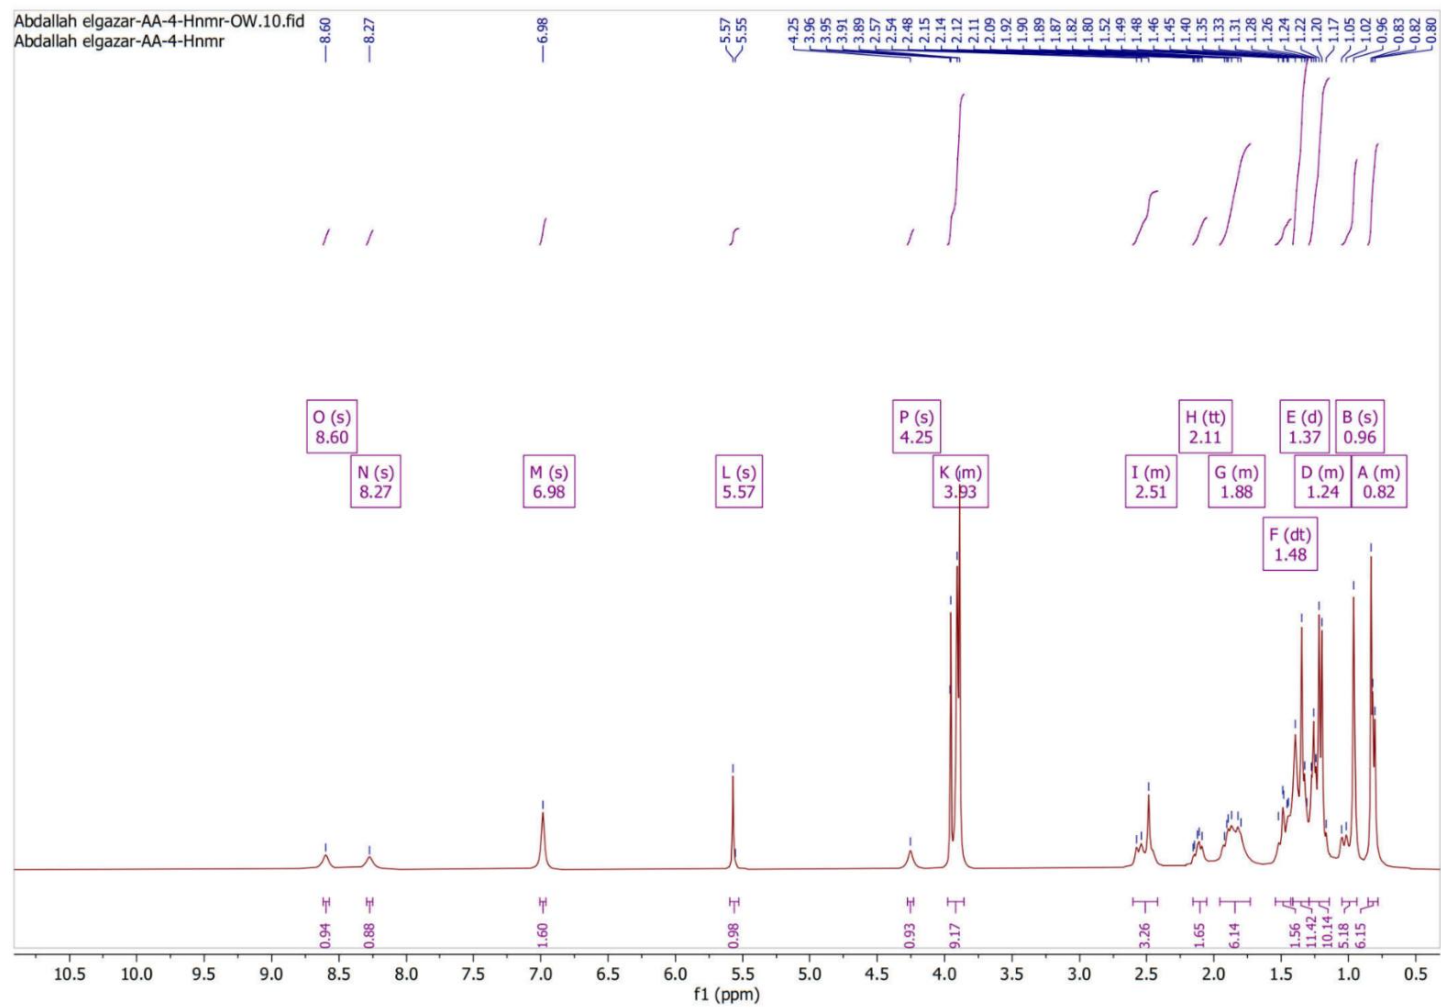

Figure S31 . <sup>1</sup>H N.M.R spectrum of compound 16d

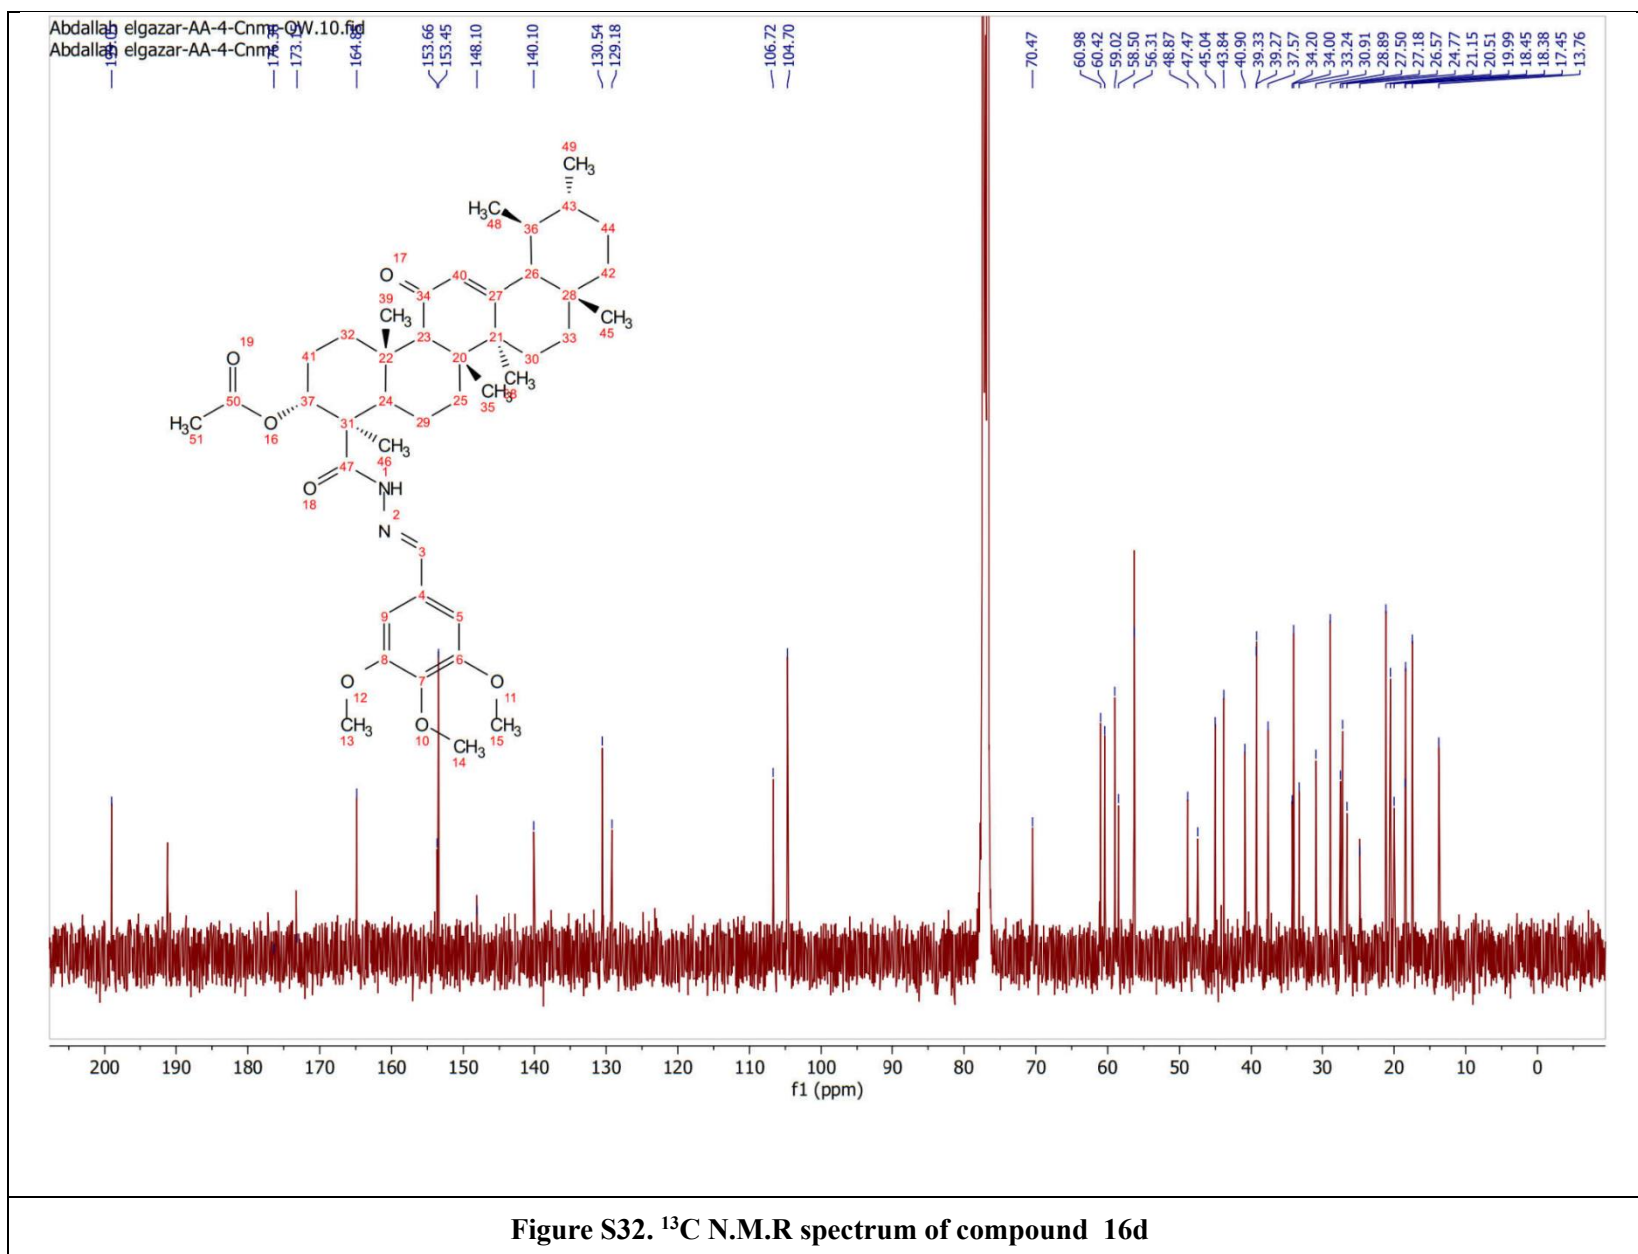

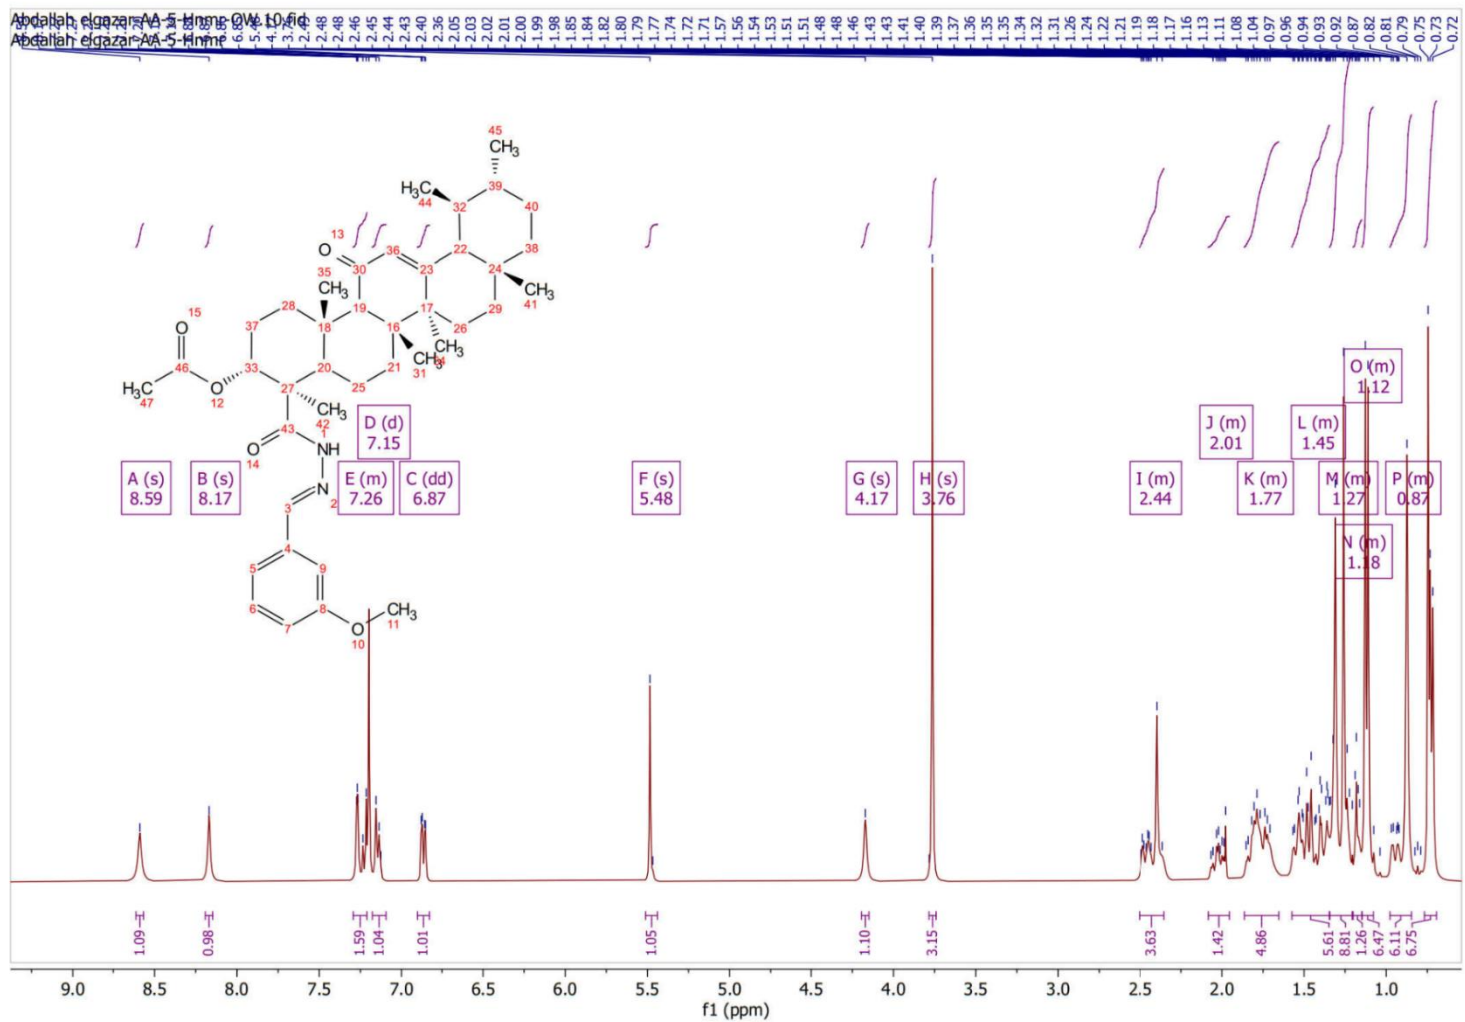

Figure S33. <sup>1</sup>H N.M.R spectrum of compound 16e

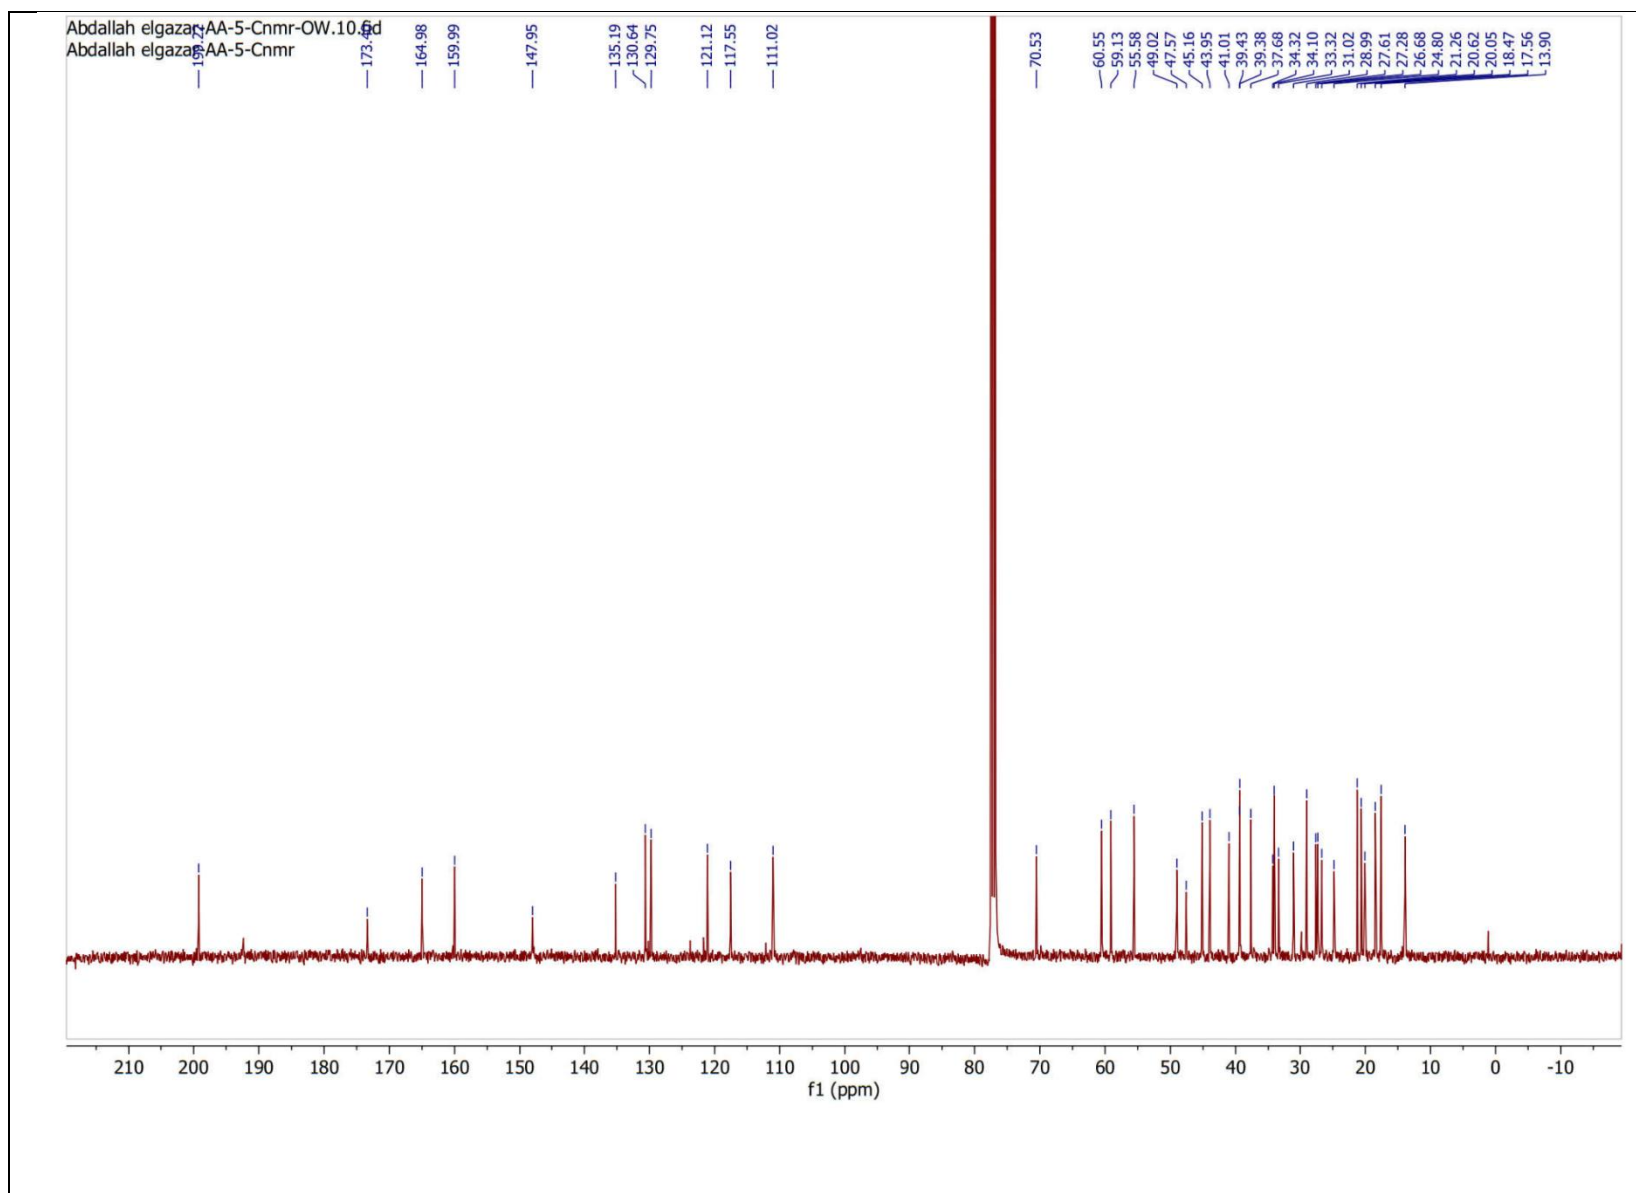

Figure S34.  $^{13}\text{C}$  N.M.R spectrum of compound 16e



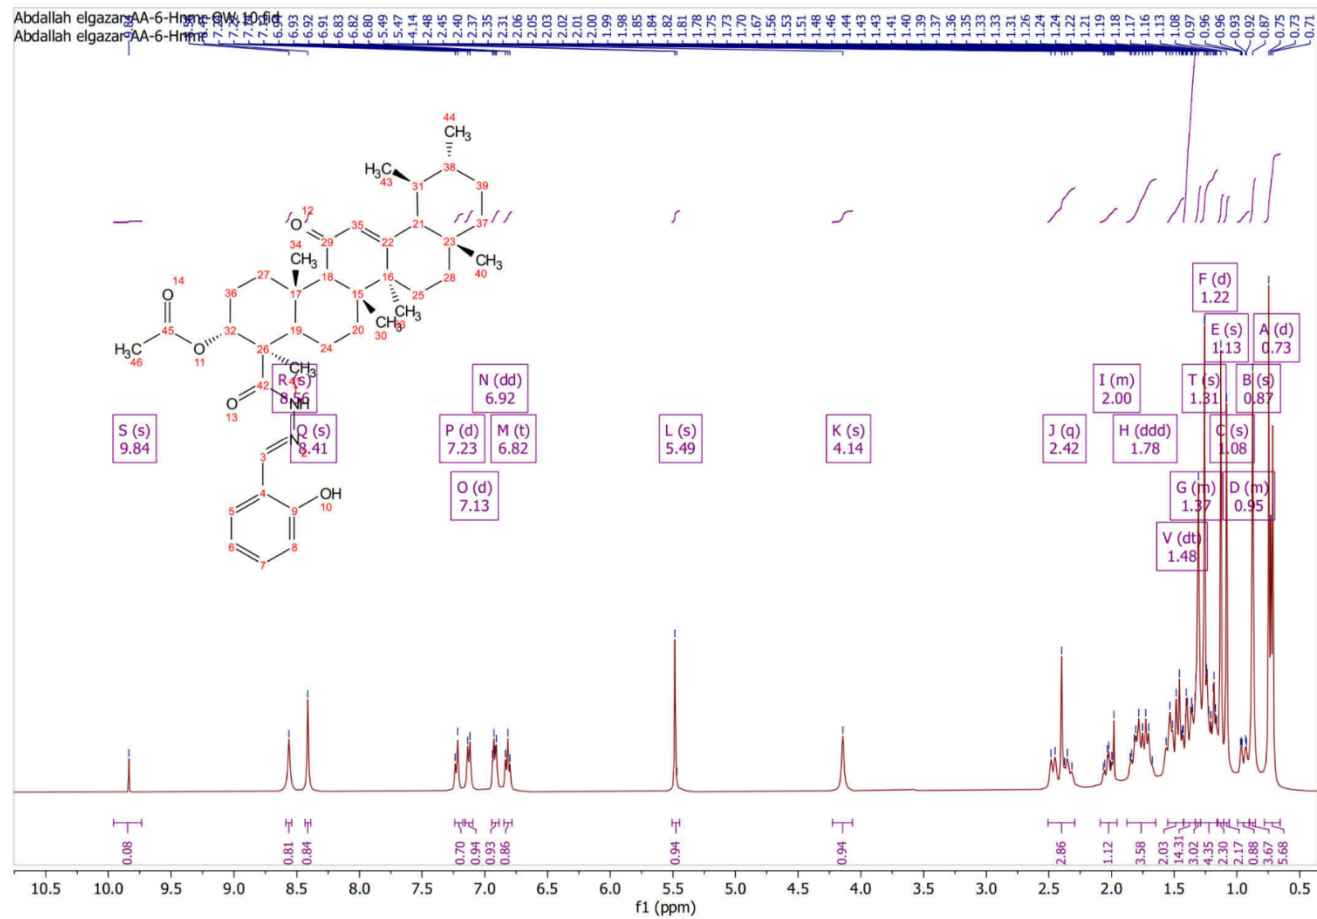

Figure S35.  $^1\text{H}$  N.M.R spectrum of compound 16f

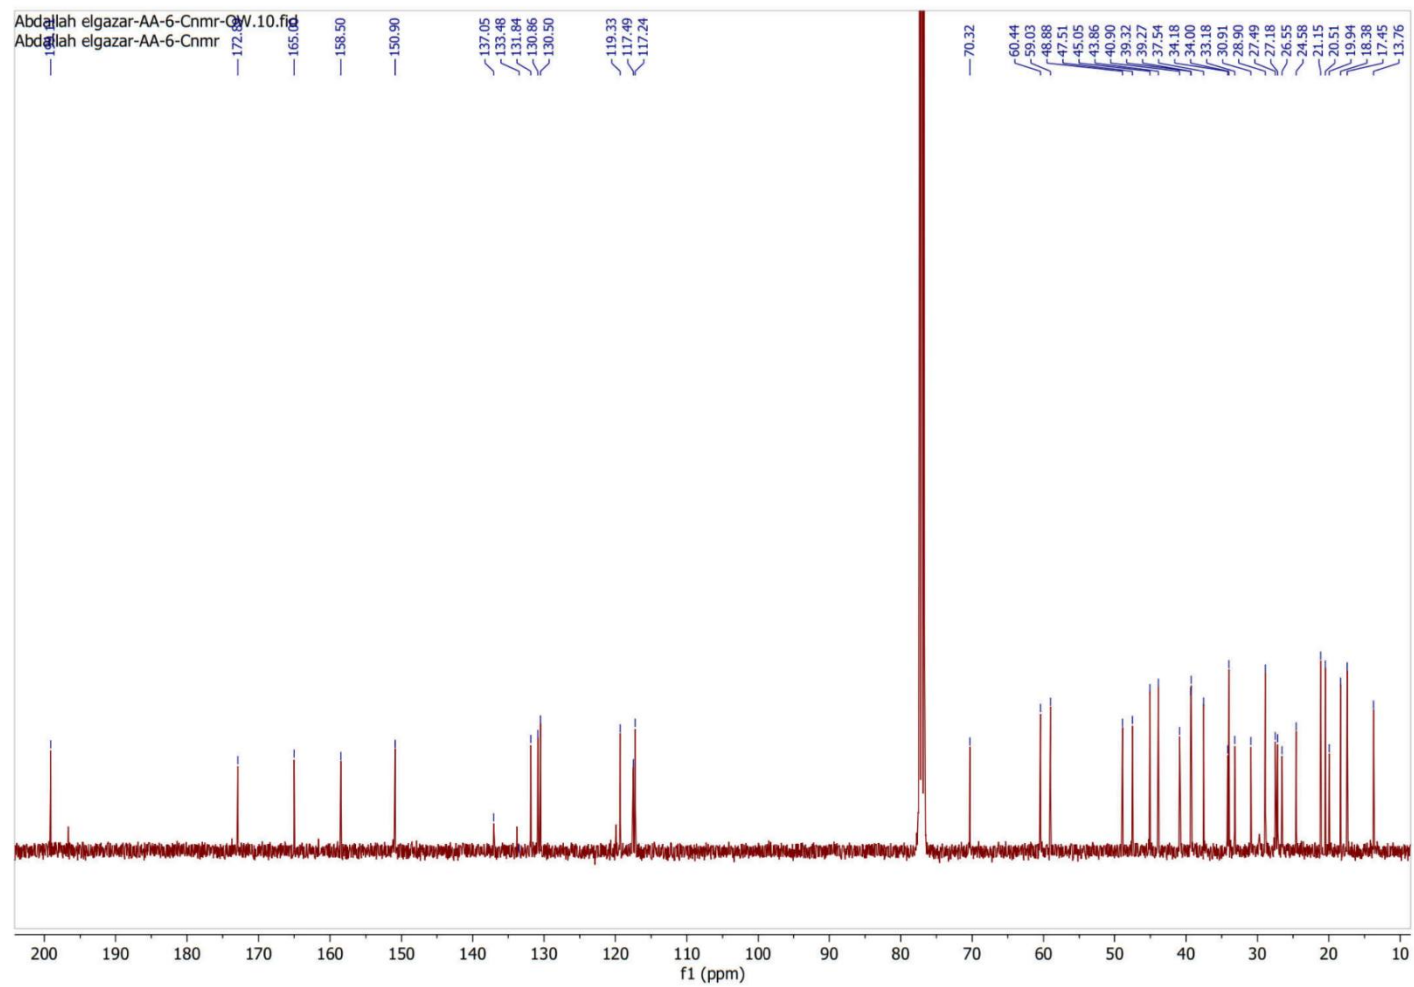

Figure S36.  $^{13}\text{C}$  N.M.R spectrum of compound 16f



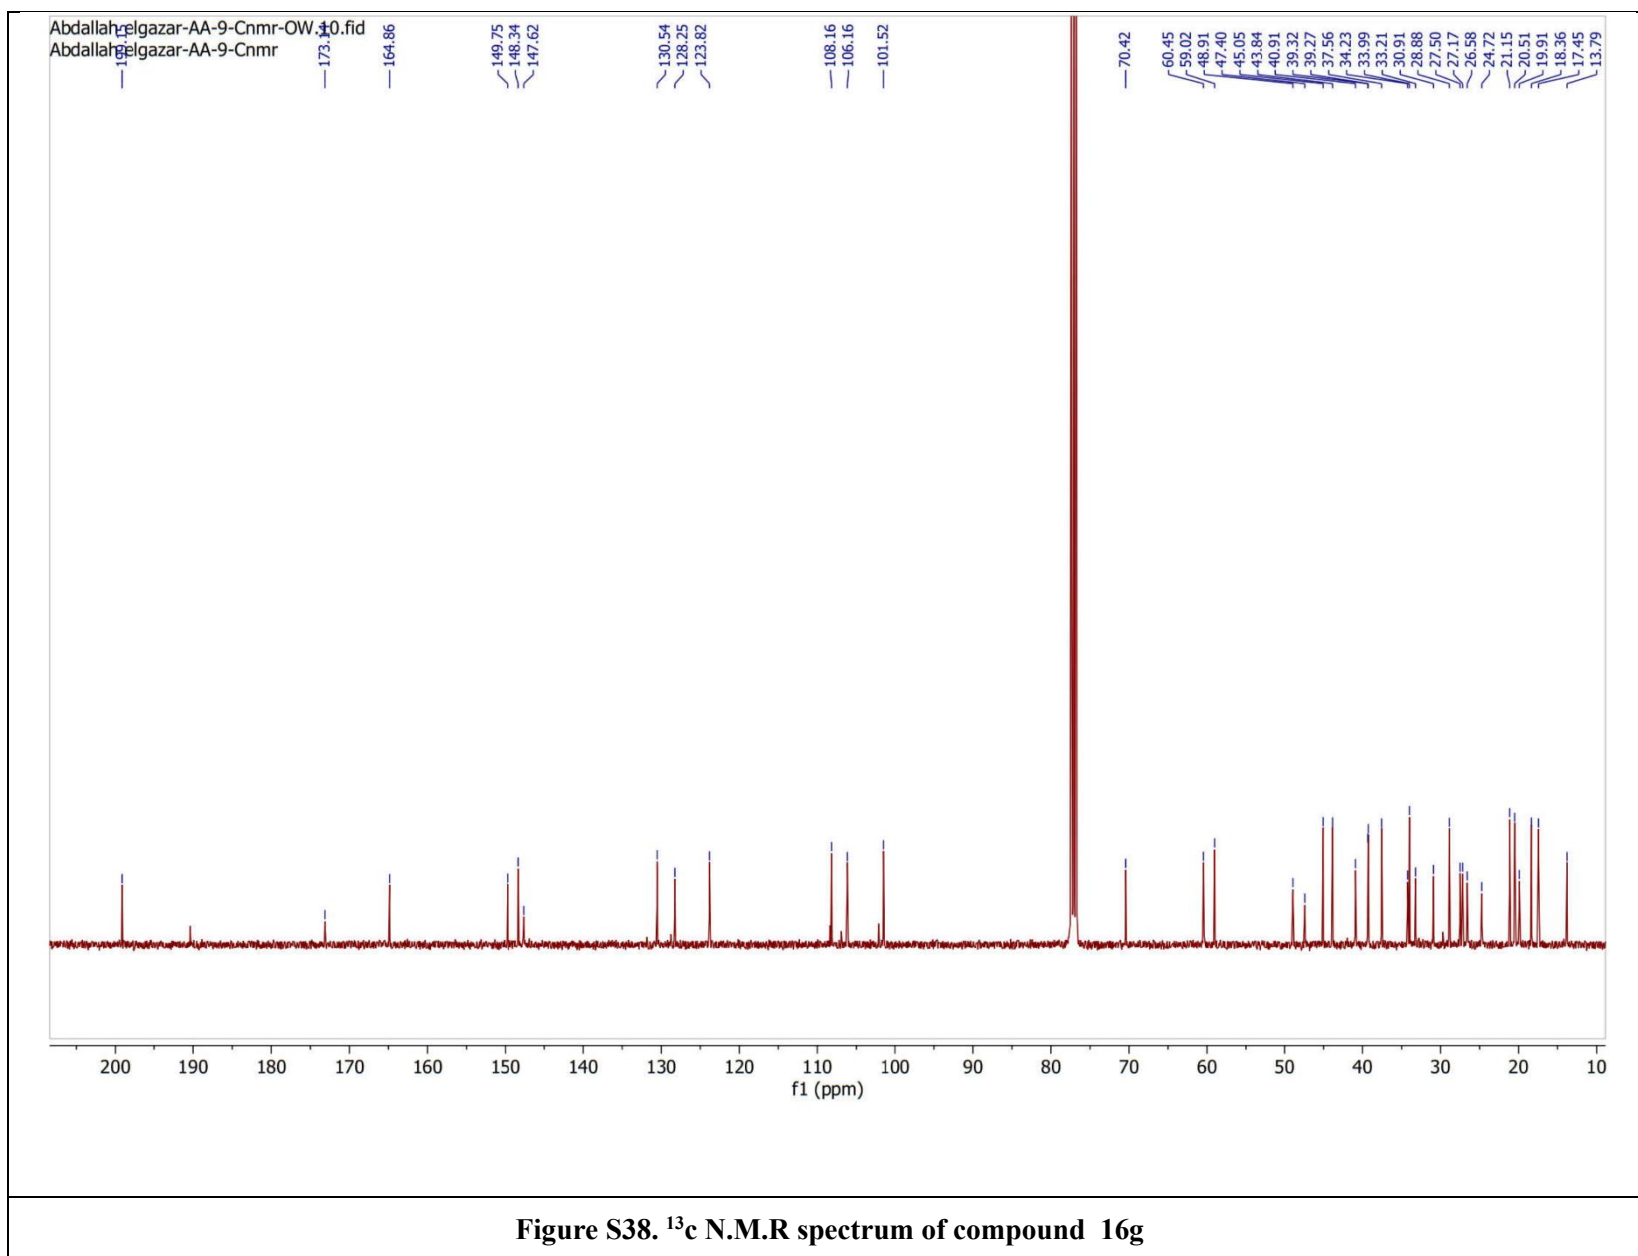

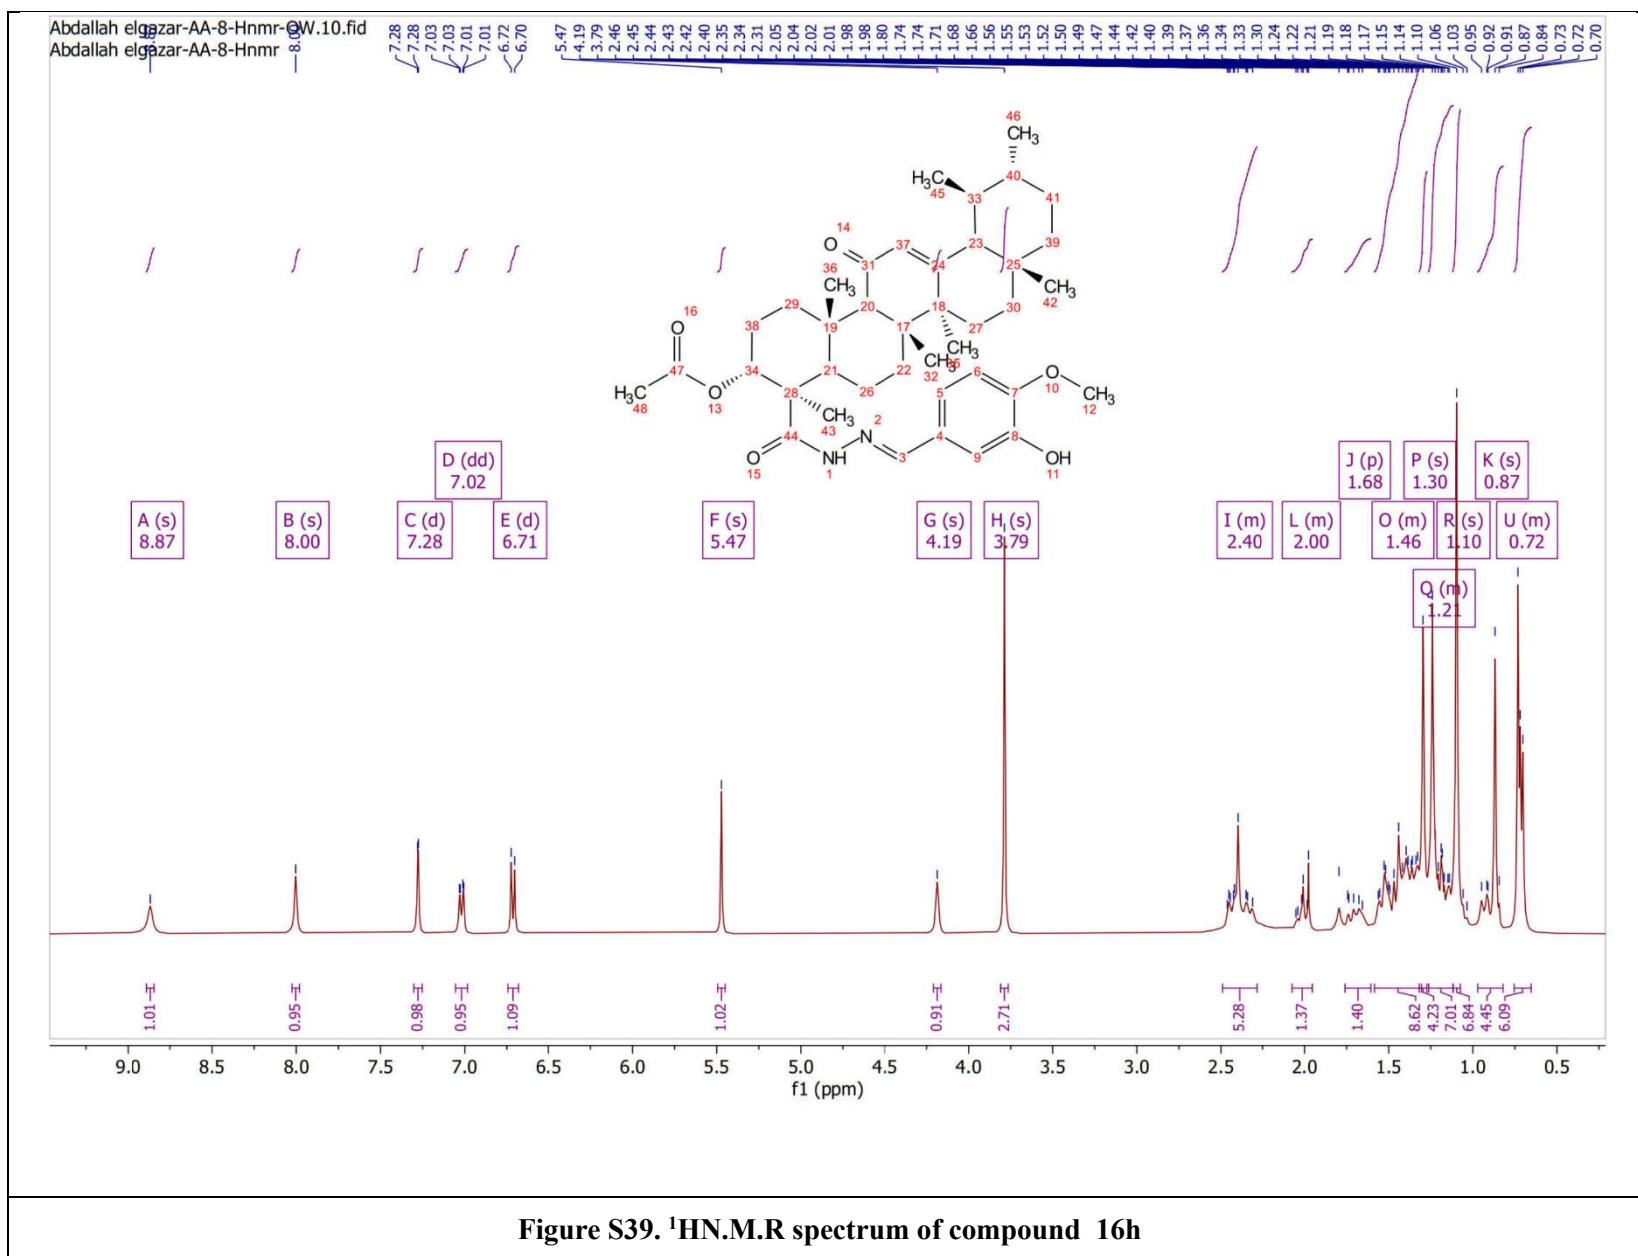

Figure S39. <sup>1</sup>H NMR spectrum of compound 16h

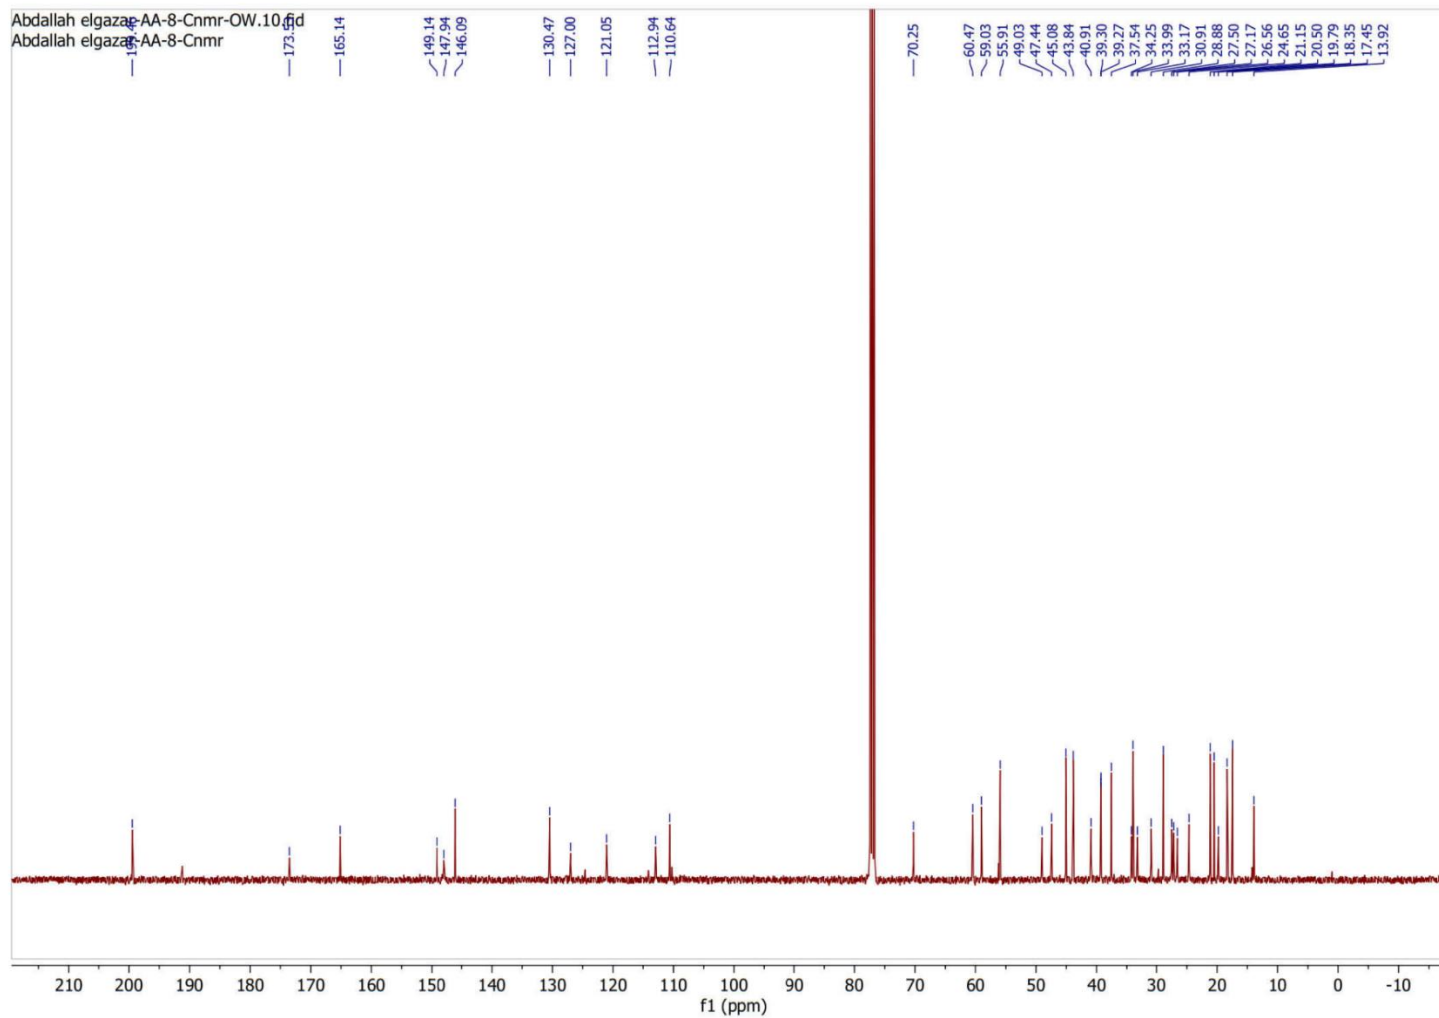

Figure S40.  $^{13}\text{C}$  N.M.R spectrum of compound 16h

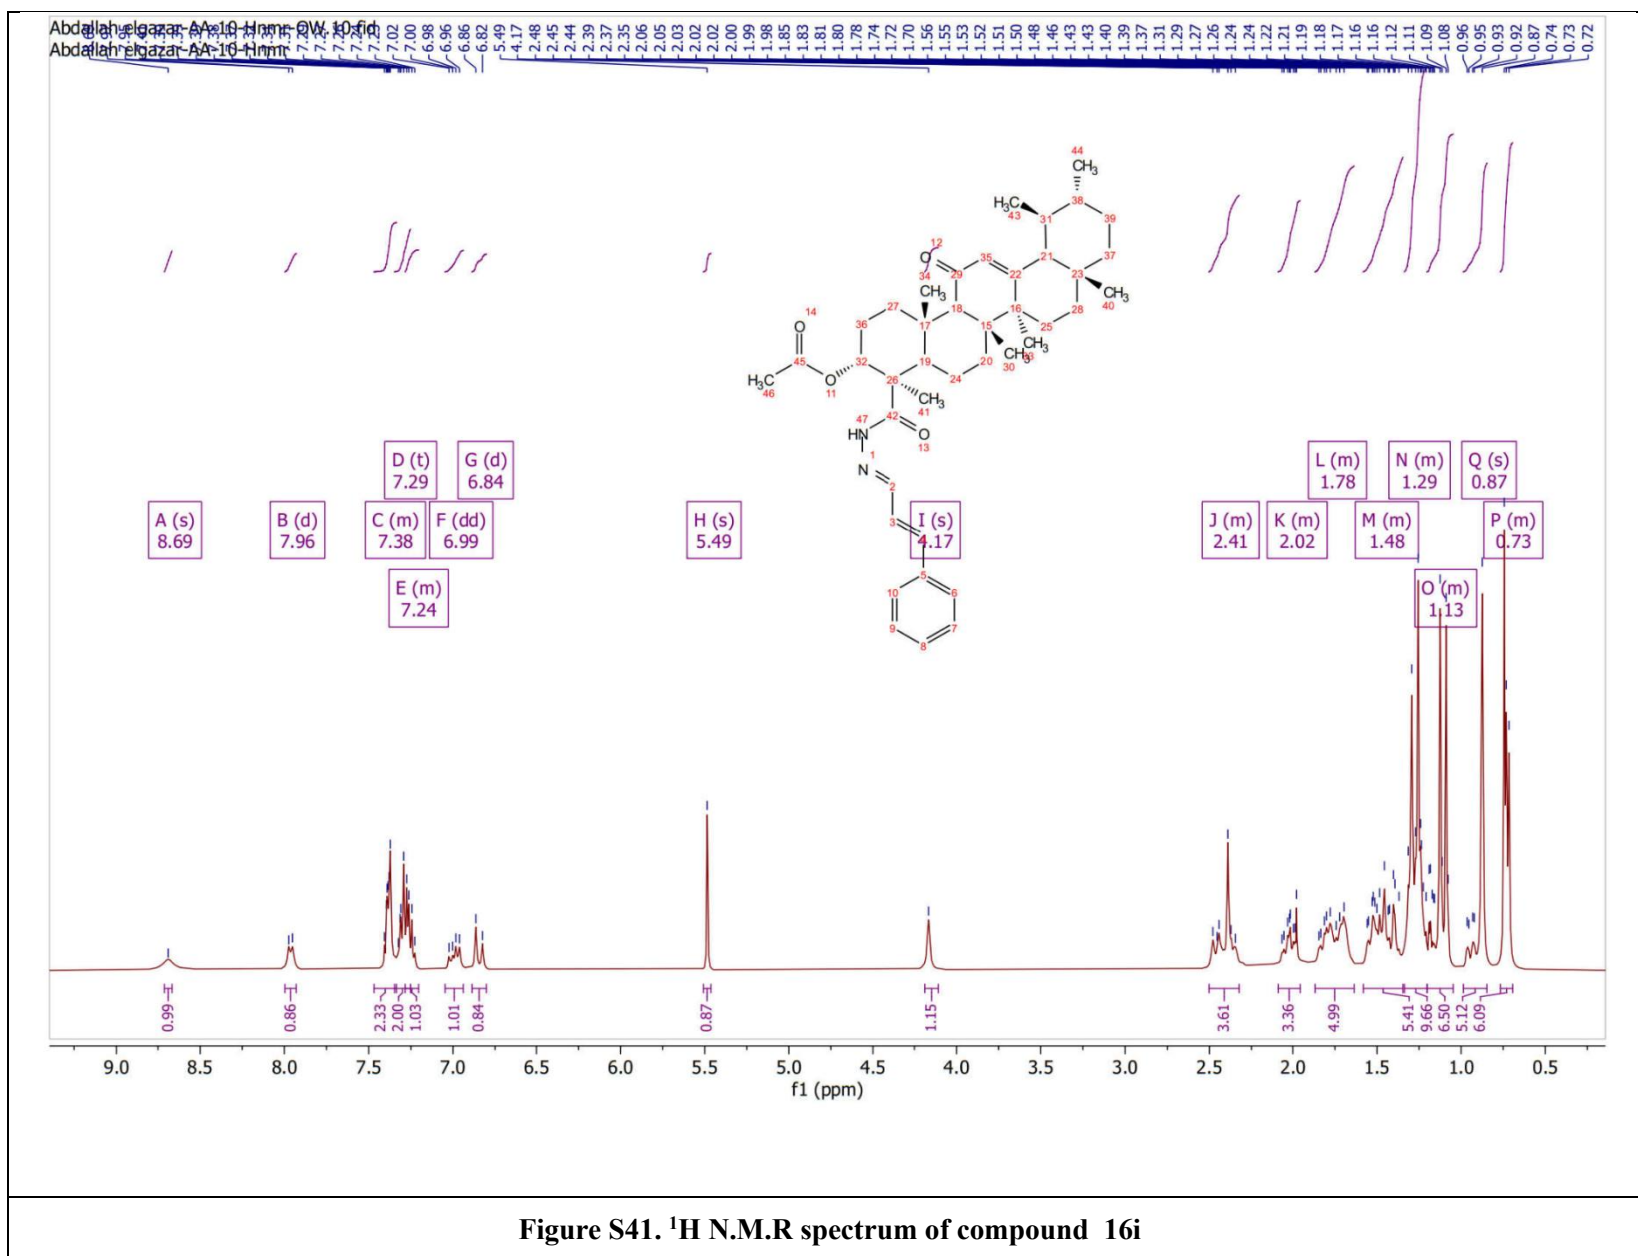

Figure S41. <sup>1</sup>H N.M.R spectrum of compound 16i

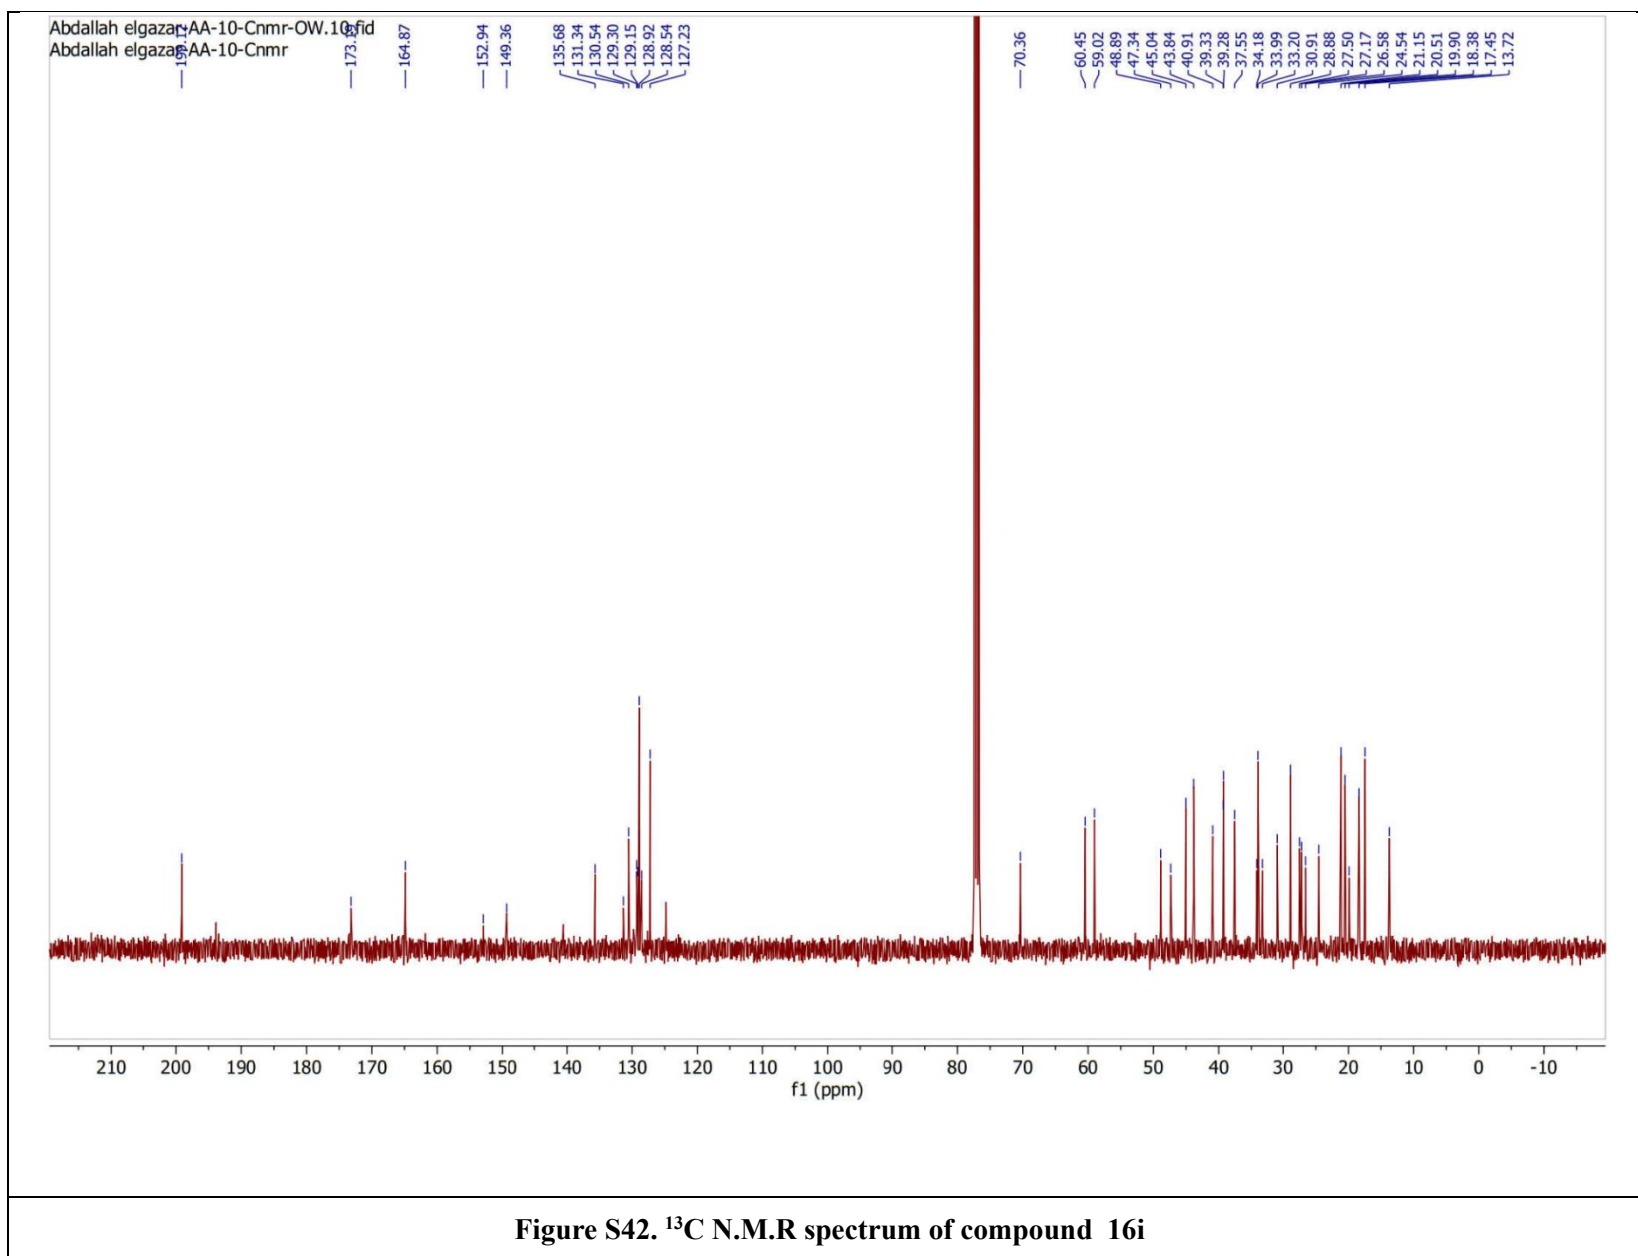



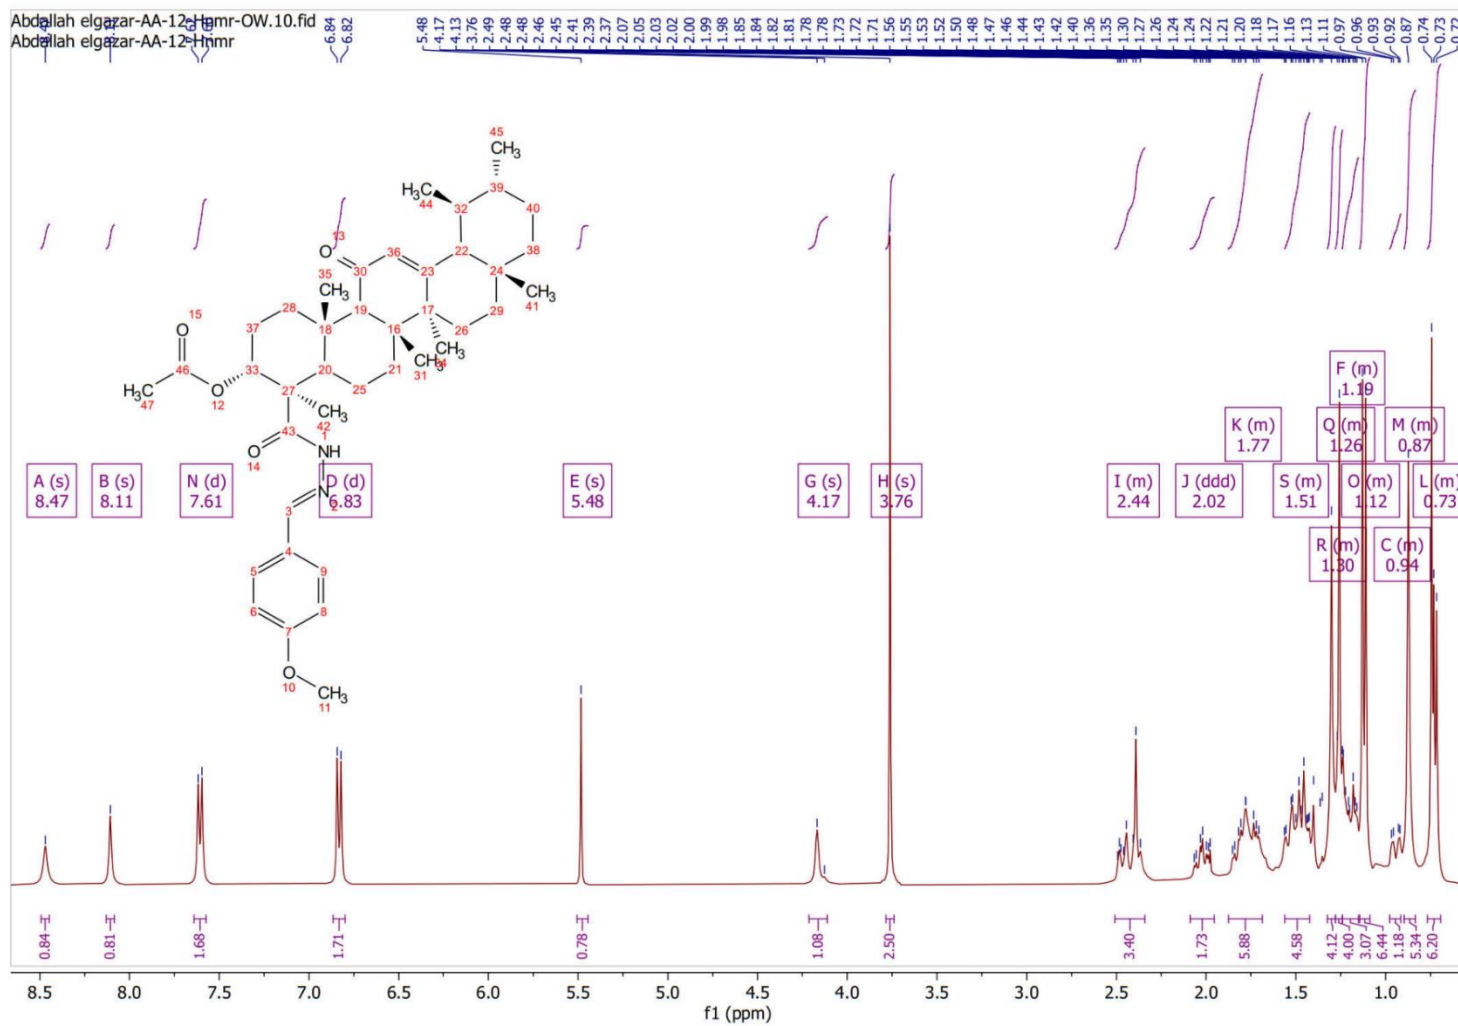

Figure S43. <sup>1</sup>H N.M.R spectrum of compound 16j

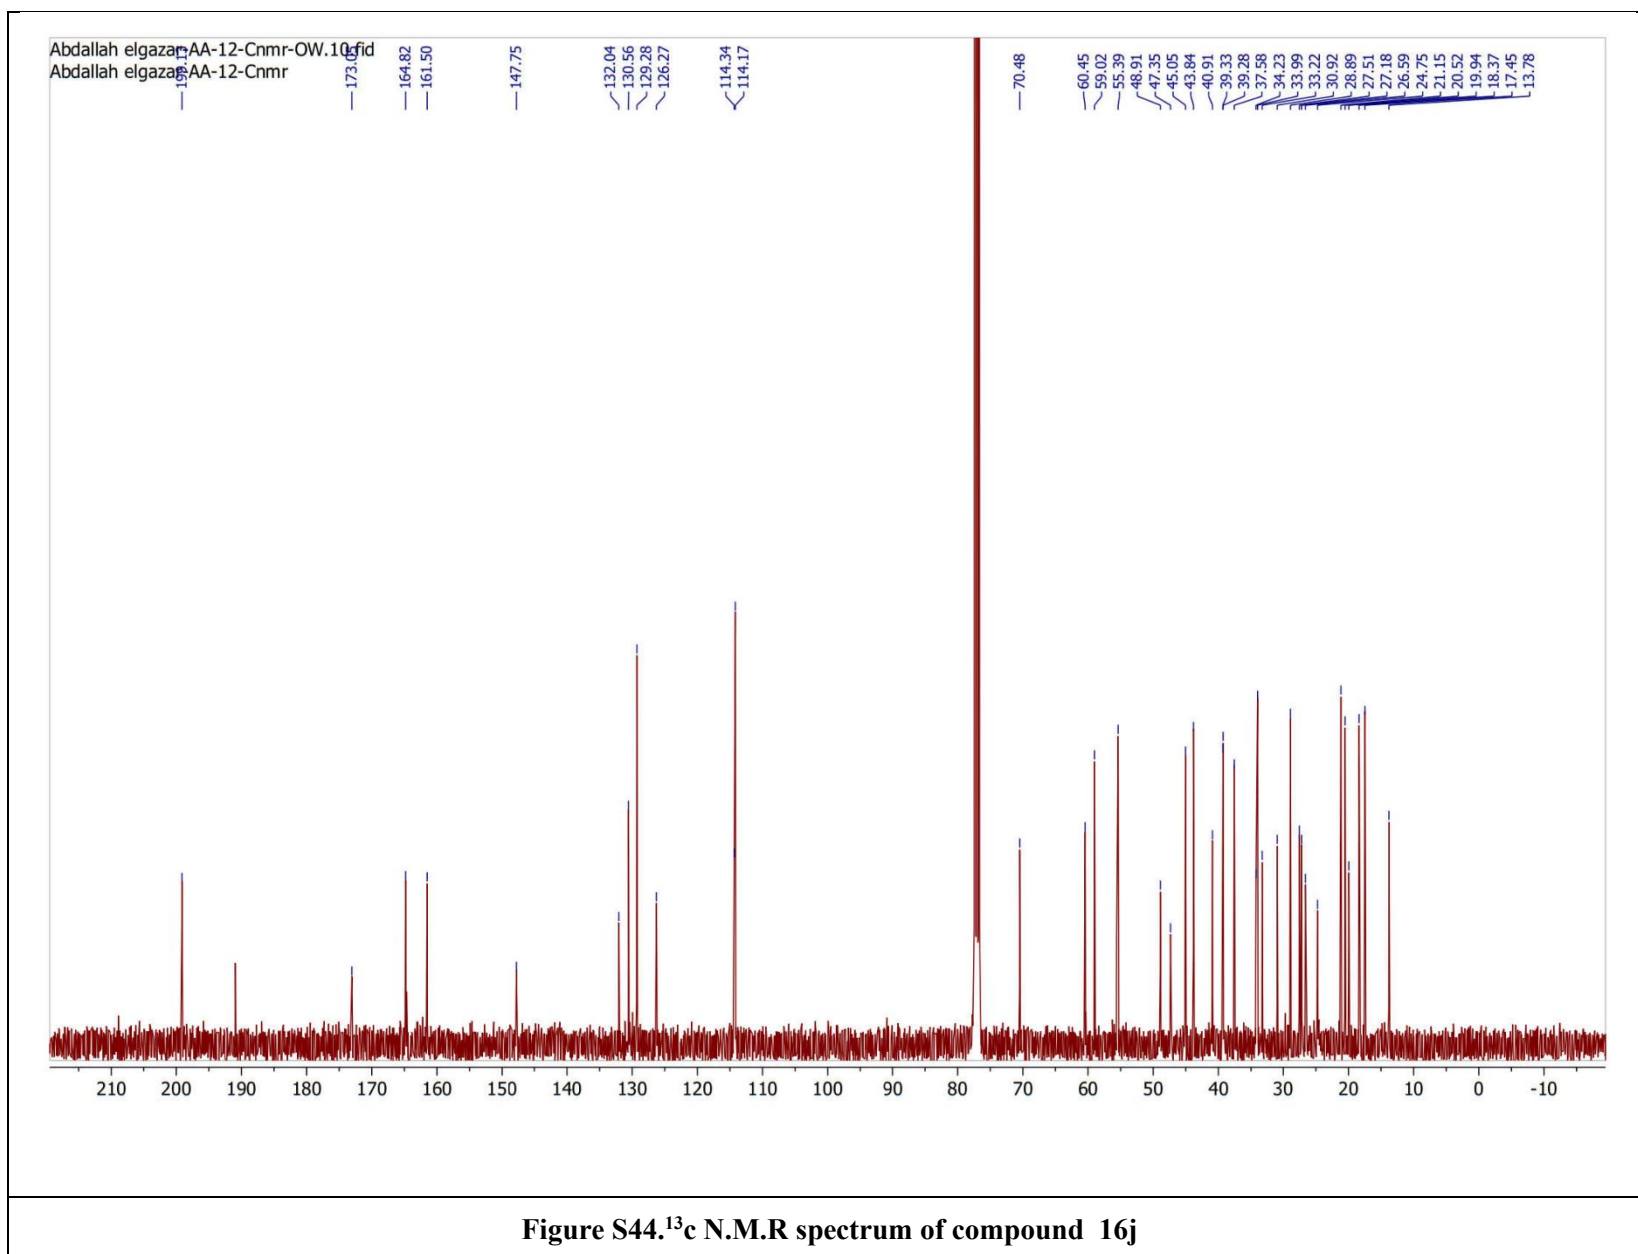

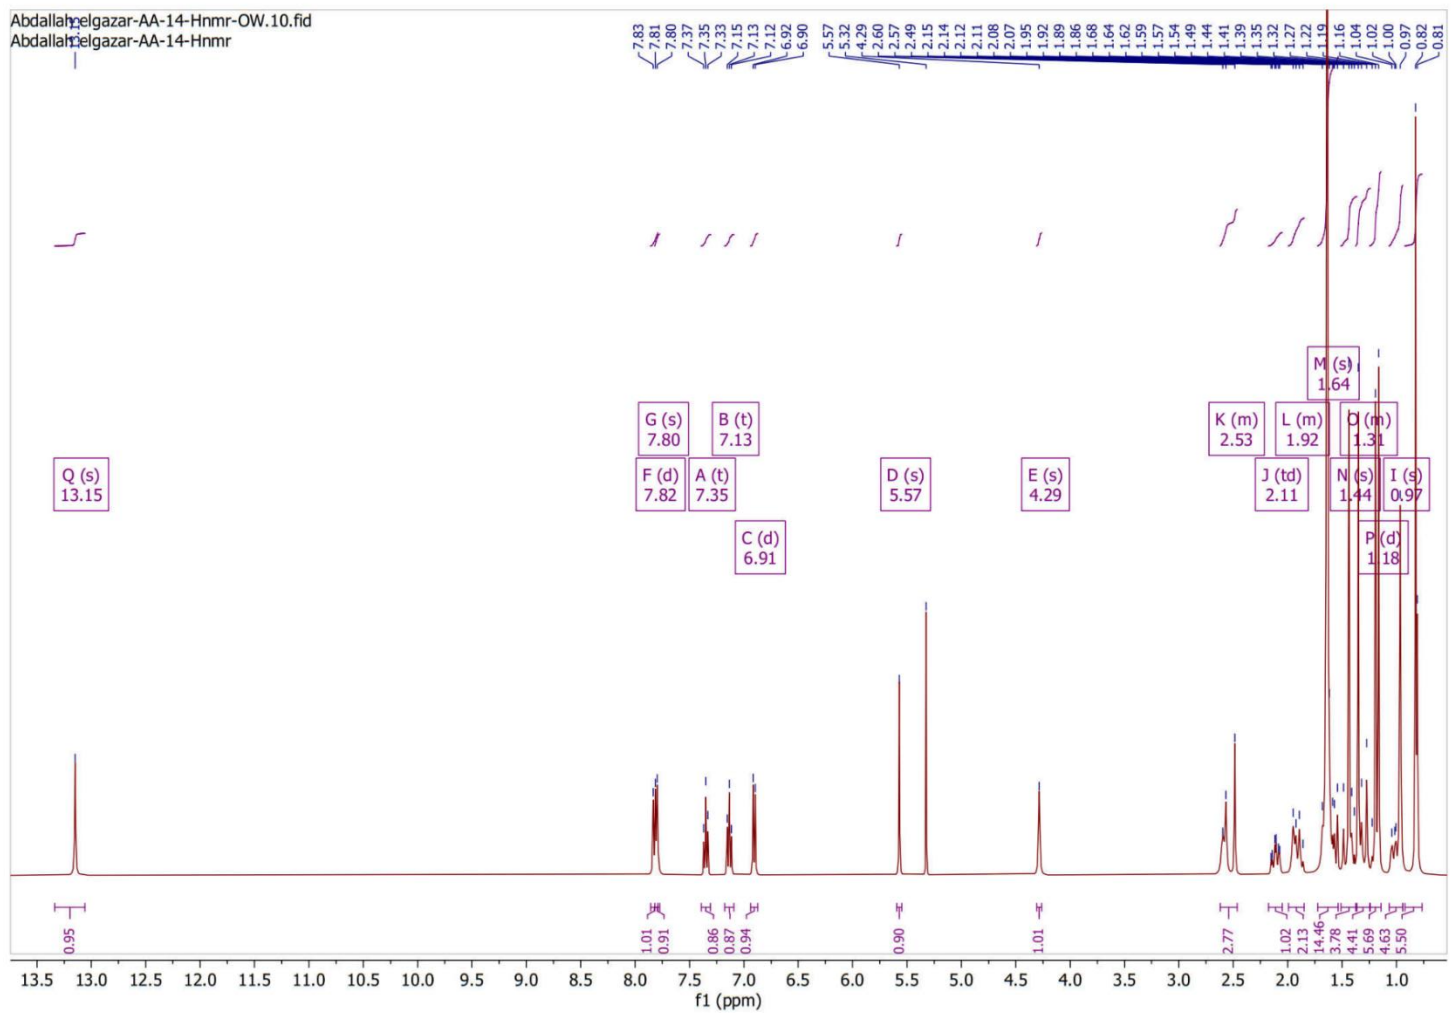

Figure S45. <sup>1</sup>H N.M.R spectrum of compound 18

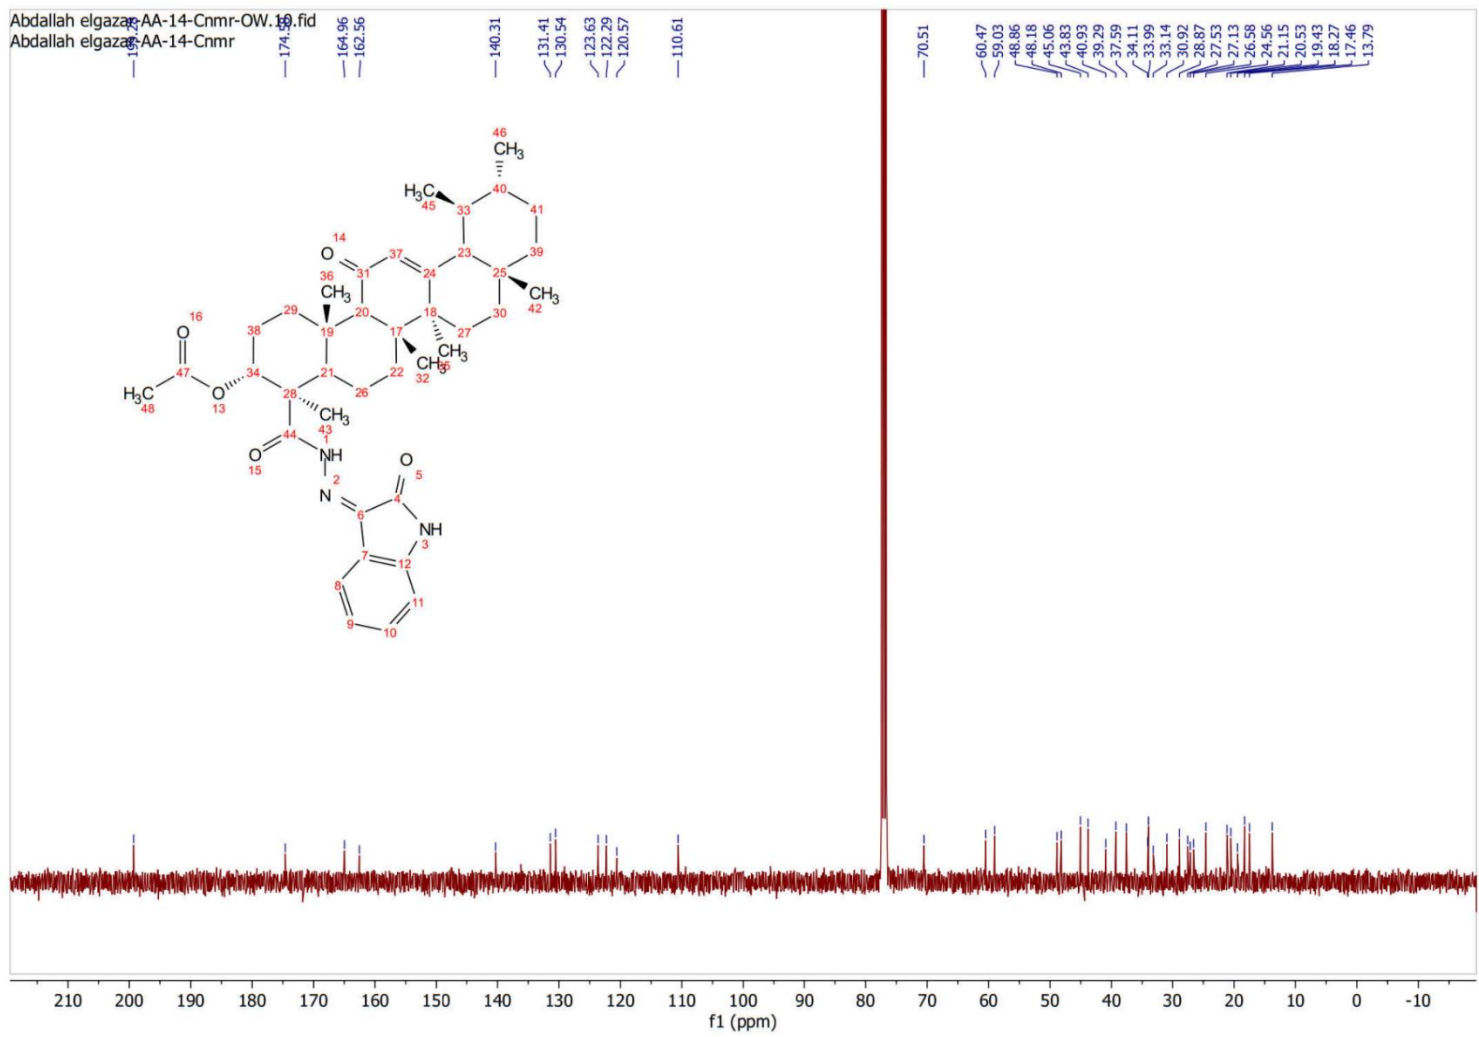

Figure S46. <sup>13</sup>C N.M.R spectrum of compound 18
